# Supplementary material for: Do smartphone applications and activity trackers increase physical activity in adults? Systematic review, meta-analysis and metaregression
Source: HighWire-hosted journal article supplement (doi:10.1136/bjsports-2020-102892), 2020-12-21
Supplement: bjsports-2020-102892supp001_data_supplement.pdf [file bjsports-2020-102892supp001_data_supplement.pdf]

## **Supplementary Online Content**

**Supplement 1: eMethods 1. Search Strategy**

**Supplement 2: eTable 1. Inclusion and exclusion criteria**

**Supplement 3: eMethods 2. Differences between protocol and review**

**Supplement 4: eMethods 3. Strategy for data synthesis in studies reporting several arms or outcomes**

**Supplement 5: eMethods 4. Calculating effect sizes as daily step counts from standardized difference in means**

**Supplement 6: eMethods 5. Sensitivity analyses conducted**

**Supplement 7: eMethods 6. Subgroup analyses and meta-regression, with differences from protocol**

**Supplement 8: eResults 1. List of articles excluded after full-text review for not meeting inclusion criteria regarding the population, intervention, outcome or study design**

**Supplement 9: eTable 2. Kappa score for pairs of investigators in title and abstract screening and full-text screening**

**Supplement 10: eTable 3. Characteristics of studies not included in the meta-analysis**

**Supplement 11: eTable 4. Studies not included in the meta-analysis: Components and behaviour change techniques of intervention and control groups, as well as theories, incentives, and study retention rates**

**Supplement 12: eTable 5. Risk of bias of studies not included in the meta-analysis**

**Supplement 13: eTable 6. Risk of bias of studies included in the meta-analysis**

**Supplement 14: eTable 7. Conflict of interests, funding sources, and adherence to reporting guidelines in included studies**

**Supplement 15: eTable 8. Information about outcomes from each study included in the meta-analysis**

**Supplement 16: eTable 9. Engagement with the intervention and retention rates in included studies**

**Supplement 17: eTable 10. Incentives for study compliance in included studies**

**Supplement 18: eTable 11. Behaviour change techniques, theories, models, and constructs in included studies**

**Supplement 19: eTable 12. Presence of gamification and games in included studies**

**Supplement 20: eTable 13. Presence of personalization in included studies**

**Supplement 21: eFigure 1. Funnel plot of standard error by standardised difference in means**

**Supplement 22: eTable 14. Sensitivity analyses**

**Supplement 23: eFigure 2. Forest plot of effect sizes and 95% confidence intervals by ascending order of retention rate representing the effect of interventions involving mobile applications or activity trackers in increasing physical activity (random effects model)**

**Supplement 24: eFigure 3: Forest plot of effect sizes and 95% confidence intervals by ascending order of study duration representing the effect of interventions involving mobile applications or activity trackers in increasing physical activity (random effects model)**

**Supplement 25: eFigure 4: Forest plot of effect sizes and 95% confidence intervals by decreasing order of number of low risk of bias categories (out of 6 categories in the Cochrane risk of bias tool) representing the effect of interventions involving mobile applications or activity trackers in increasing physical activity (random effects model)**

**Supplement 26: eFigure 5. Forest plot of effect sizes and 95% confidence intervals by subgroup of studies where the intervention included behaviour change techniques in the ‘goals and planning’ category, representing the effect of interventions involving mobile applications or activity trackers in increasing physical activity (random effects model)**

**Supplement 27: eFigure 6. Forest plot of effect sizes and 95% confidence intervals by subgroup of studies where the intervention included text-messaging, representing the effect of interventions involving mobile applications or activity trackers in increasing physical activity (random effects model)**

**Supplement 28: eFigure 7. Forest plot of effect sizes and 95% confidence intervals by subgroup of studies mentioning personalisation features, representing the effect of interventions involving mobile applications or activity trackers in increasing physical activity (random effects model)**

**Supplement 29: eFigure 8. Forest plot of effect sizes and 95% confidence intervals by subgroup of studies where authors mentioned conflicts of interest, representing the effect of interventions involving mobile applications or activity trackers in increasing physical activity (random effects model)**

**Supplement 30: eFigure 9. Forest plot of effect sizes and 95% confidence intervals by subgroup of studies where the intervention included the behaviour change technique ‘graded tasks’, representing the effect of interventions involving mobile applications or activity trackers in increasing physical activity (random effects model)**

**Supplement 31: eFigure 10. Forest plot of effect sizes and 95% confidence intervals by subgroup of studies mentioning a behaviour change theory, representing the effect of interventions involving mobile applications or activity trackers in increasing physical activity (random effects model)**

**Supplement 32: eTable 15. Subgroup analyses**

## **Supplement 1: eMethods 1. Search Strategy**

Search strategy defined in collaboration with a medical librarian.

### **1.1. Search strategy for MEDLINE (via PubMed interface)**

URL: <https://www.ncbi.nlm.nih.gov/pubmed/>

Limits: last 10 years

- #1      “Mobile applications”[MeSH] OR “Smartphone”[MeSH] OR tablet computer\*[tiab] OR wearable device\*[tiab] OR acceleromet\*[tiab] OR activity monitor\*[tiab] OR “Fitness trackers”[MeSH] OR fitbit\*[tiab] OR armband\*[tiab] OR arm band\*[tiab] OR fitness watch\*[tiab] OR pedomet\*[tiab] OR wearable technolog\*[tiab] OR wearable system\*[tiab] OR wearable sensor\*[tiab] OR fitness monitor\*[tiab] OR garmin[tiab] OR bodymedia[tiab] OR nike fuelband[tiab] OR jawbone[tiab] OR step count[tiab] OR smartwatch\*[tiab] OR smart watch\*[tiab] OR sports watch\*[tiab] OR wristband\*[tiab] OR wrist band\*[tiab] OR MyFitnessPal [tiab]
- #2      "Sedentary Lifestyle"[MeSH] OR "Obesity"[MeSH] OR "Weight Loss"[Mesh:NoExp] OR "Weight Reduction Programs"[MeSH] OR "Exercise"[MeSH] OR "Overweight"[MeSH] OR “Healthy LifeStyle”[MeSH] OR “Caloric Restriction”[MeSH] OR “Diet, Diabetic”[MeSH] OR “Diet, Mediterranean”[MeSH] OR “Diet, Reducing”[MeSH]
- #3      #1 AND #2

### **1.2. Search strategy for EMBASE**

URL: Macquarie University Library (via OVID interface)

Limits: last 10 years

- #1      Mobile Application/ or Smartphone/ or pedometer/ or (“tablet computer” or "wearable device\*" or "activity track\*" or fitbit\* or "fitness track\*" or "fitness watch\*" or "wearable system\*" or "fitness monitor\*" or garmin or bodymedia or "nike fuelband" or jawbone or "step count\*" or smartwatch\* or "smart watch\*" or "sports watch\*" or wristband\* or "wrist band\*").mp
- #2      Weight reduction/ or lifestyle modification/ or “healthy lifestyle”.mp or physical activity/ or diet/ or diet restriction/
- #3      #2 and #3

### **1.3. Search strategy for PsychINFO**

URL: Macquarie University Library (via OVID interface)

Limits: last 10 years

[mp=title, abstract, heading word, table of contents, key concepts, original title, tests & measures]

- #1      ("mobile application\*" or smartphone\* or "tablet computer\*" or pedomet\* or "wearable device\*" or acceleromet\* or "activity track\*" or fitbit\* or "fitness track\*" or "wearable system\*" or "wearable technolog\*" or "fitness monitor\*" or garmin or bodymedia or "nike fuelband" or jawbone or "step count\*" or smartwatch\* or "smart watch\*" or "sports watch\*" or wristband\* or "wrist band\*" or armband\* or "arm band\*").mp
- #2      (“weight loss” or “weight maintenance” or “weight reduction” or diet or “physical activity” or walking or exercise or “healthy lifestyle”).mp
- #3      #1 AND #2

### **1.4. Search strategy for CINAHL**

URL: Macquarie University Library (via EBSCO Publishing)

- #1 "mobile application\*" OR smartphone\* OR "tablet computer\*" OR pedomet\* OR "wearable device\*" OR "activity track\*" OR fitbit\* OR "fitness tracker\*" OR "fitness watch\*" OR "wearable system\*" OR "fitness monitor\*" OR "wearable technolog\*" OR garmin OR bodymedia OR "nike fuelband" OR jawbone OR "step count\*" OR smartwatch\* OR "smart watch\*" OR "sports watch\*" OR wristband OR "wrist band\*" OR armband\* OR "arm band"
- #2 "weight loss" OR "weight maintenance" OR "weight reduction" OR diet OR "physical activity" OR walking OR exercise OR "healthy lifestyle"
- #3 #1 AND #2

### 1.5. Search strategy for ACM Digital Library

URL: Macquarie University Library (via EBSCO Publishing)

[ACM Digital does not allow the use of boolean operators]

Fitbit; mhealth; "activity tracker"; "mobile health"; "fitness tracker"; armband; wristband; pedomet\*

### 1.6. Search strategy for SciELO (Scientific Electronic Library Online)

URL: [www.scielo.org](http://www.scielo.org)

[SciELO does not allow the use of boolean operators]

Filters: Health Sciences

Wearable\*; Fitbit; pedomet\*; acceleromet\*; smartphone\*; "Mobile application"

### 1.7. Search strategy for ClinicalTrials.gov

URL: <https://clinicaltrials.gov/ct2/search/advanced>

Filters:

Study type: Interventional studies

Age group: adult

Condition: Body Weight OR Body Weight Changes OR Obesity OR Overweight OR Weight Loss OR Physical Activity OR Sedentary OR Diet OR Diet Modification OR Dietary intervention OR Healthy Lifestyle Behaviors OR Dietary habits OR Sedentary Lifestyle

- #1 Mobile application\* OR Smartphone\* OR tablet computer\* OR wearable device\* OR activity monitor\* OR Fitness tracker\* OR fitbit\* OR pedomet\* OR wearable system\* OR fitness monitor\* OR wrist band\* OR MyFitnessPal

### 1.8. Cochrane Central Register of Controlled Trials

URL: <http://onlinelibrary.wiley.com/cochranelibrary/search/>

Title, Abstract, Keywords

Publication Year from 2006 to 2017

Filter: Trials

- #1 "Mobile application\*" OR Smartphone\* OR "tablet computer\*" OR "wearable device\*" OR "activity monitor\*" OR "fitness tracker\*" OR fitbit\* OR pedomet\* OR "wearable system\*" OR "fitness monitor\*" OR "wrist band\*" OR MyFitnessPal
- #2 "weight loss" OR "weight maintenance" OR "weight reduction" OR diet OR "physical activity" OR walking OR exercise OR "healthy lifestyle"
- #3 #1 AND #2

**Supplement 2: eTable 1. Inclusion and exclusion criteria**

|                     | Inclusion                                                                                                                                                                                                                                                                                                                                                                                                                   | Exclusion                                                                                                                                                                                                                                                                                                                                                                                                                                                                                                                                                                     |
|---------------------|-----------------------------------------------------------------------------------------------------------------------------------------------------------------------------------------------------------------------------------------------------------------------------------------------------------------------------------------------------------------------------------------------------------------------------|-------------------------------------------------------------------------------------------------------------------------------------------------------------------------------------------------------------------------------------------------------------------------------------------------------------------------------------------------------------------------------------------------------------------------------------------------------------------------------------------------------------------------------------------------------------------------------|
| <b>Population</b>   | Adults (18-65) without chronic illness: healthy adults with any BMI. For studies including individuals up to 2 years outside of these boundaries, they were included if the mean age of study sample was above 18 and below 65. For studies including children and/or the elderly, they were only included if results for adults (18-65) were reported separately.                                                          | Studies focusing on: <ul style="list-style-type: none"> <li>• Elderly people (65 or plus years old); e.g. mean age of study sample &gt;65</li> <li>• Athletes, military</li> <li>• Patients with disabilities or chronic conditions, defined as a persistent (or otherwise long-lasting) condition that requires self-management and often requires therapy.</li> <li>• Patients with psychiatric conditions or mental disability</li> <li>• Pregnant women</li> </ul>                                                                                                        |
| <b>Intervention</b> | Includes a mobile application or a physical activity tracker enabling automated self-monitoring and feedback on physical activity measures in real-time, facilitating seamless ongoing access to tracked measures throughout time (either via the tracker's display or by wirelessly syncing with an app). The mobile application or tracker can be either isolated or delivered as part of a multi-component intervention. | Static pedometers or activity trackers not allowing for seamless ongoing access to tracked measures throughout time (either via the tracker's display or by wirelessly syncing with an app).<br>Activity trackers requiring a USB connection to sync to a computer (not wireless) such as "Grube" (MUVE, Inc) and the Personal Activity Monitor (PAM).<br>Mobile applications not enabling automated self-monitoring (i.e. not collecting smartphone accelerometer data nor syncing with a tracker, instead requiring users to manually self-report their physical activity). |
| <b>Comparison</b>   | Either 'no intervention' (e.g. usual care, waiting list) or active controls (receiving an intervention with or without mhealth components).                                                                                                                                                                                                                                                                                 |                                                                                                                                                                                                                                                                                                                                                                                                                                                                                                                                                                               |
| <b>Outcome</b>      | Any measure related to physical activity (e.g. step count).                                                                                                                                                                                                                                                                                                                                                                 | Exclude studies that only report cognitive outcomes (e.g. intention to exercise), motivational outcomes or other subjective psychological measures.                                                                                                                                                                                                                                                                                                                                                                                                                           |
| <b>Study type</b>   | Randomized controlled trials.                                                                                                                                                                                                                                                                                                                                                                                               |                                                                                                                                                                                                                                                                                                                                                                                                                                                                                                                                                                               |

### **Supplement 3: eMethods 2. Differences between protocol and review**

#### **Intervention**

Intervention as defined in the protocol:

‘Smart’ mobile health intervention, either isolated or as part of a multi-component intervention. For this study, we defined “smart mobile health interventions” as health interventions involving the use of either: a smartphone; a tablet computer; a mobile application (app); or a monitoring device for automatic data collection of physical activity, diet or weight-related data (e.g. fitness tracker, wireless weight scale) with a consumer interface (e.g. app, web-based platform) enabling ongoing access to tracked measures throughout time (with data transmission occurring either wirelessly or through a hardware connection). We will exclude studies focusing on: MP3 players, podcast-only interventions, SMS-only interventions, personal digital assistant (PDA) or equivalent (e.g. handheld personal computer), web-only interventions (e.g. web-based application instead of a mobile application), telephone-only interventions (e.g. telephone coaching), telemonitoring and telemedicine interventions (e.g. remote management by healthcare providers), static pedometers (i.e. not able to transmit data to a consumer interface).

With the purpose of eliminating ambiguity and reflecting the rapid life cycle of consumer health technology, we updated the intervention definition and criteria at the start of the data extraction phase. The new definition does not include the ambiguous term “smart mhealth technology”, specifically focusing on smartphone applications and/or activity trackers.

It is now also clearer in the definition that the technology has to enable *automated and continuous self-monitoring and feedback* on physical activity measures in *real-time*, meaning that the technology needs to show current measures of physical activity at any time (either via the tracker’s display or by wirelessly syncing with an app). In addition, the technology also has to enable *seamless ongoing access to tracked measures throughout time* (either via the tracker’s display or by wirelessly syncing with an app), which now excludes devices where data transmission occurs via USB connection, in line with the majority of trackers currently available on the market.

#### **Outcome**

Outcome as defined in the protocol:

Weight, body mass index and any measure related to physical fitness, physical activity (e.g. step count), and dietary behaviours. We will exclude studies that only report cognitive outcomes (e.g. intention to exercise), motivational outcomes or other subjective psychological measures.

The present manuscript focuses on physical activity (for homogeneity and conciseness purposes); papers focusing on weight loss and diet were excluded at the full-text screening stage and will be analysed in a separate publication.

#### **Data extraction**

In the protocol we mentioned we would extract info regarding “compliance with the mHealth evidence reporting and assessment (mERA) guidelines”.

In the present manuscript we broadened this extraction to “adherence to reporting guidelines”.

**Supplement 4: eMethods 3. Strategy for data synthesis in studies reporting several arms or outcomes**

Whenever a single study reported several arms or outcomes, the arm and outcome to be included in the meta-analysis was selected through consensus among the authors with the aim of minimising bias, favouring:

- 1) primary outcomes and outcomes from intention-to-treat analysis;
- 2) smallest attrition;
- 3) continuous outcomes;
- 4) post-intervention (i.e. immediately after the end of the intervention period, instead of mid-study or post-study follow-up);
- 5) the most person-centred outcome (i.e. meaningful to lay consumers; e.g. step count).

### Supplement 5: eMethods 4. Calculating effect sizes as daily step counts from standardized difference in means

1) Conducting a meta-analysis including only the 21 studies with daily step counts as an outcome, in order to obtain the standard error of the effect size (SE)

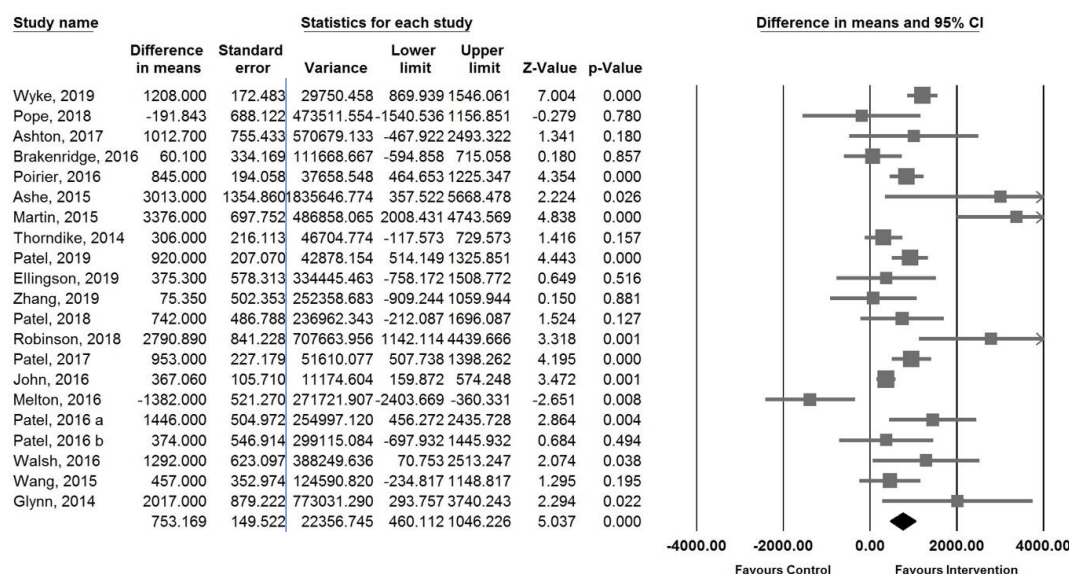

Figure 1: Forest plot of difference in means and 95% confidence intervals for the subgroup of 21 studies reporting step counts (random effects model)

SE=149.522

2) Using the standard error of the difference in means (SE) to calculate the standard deviation (SD) of the effect size of the 21 studies with daily step counts as an outcome

Estimated SD calculation:

$$SD = \frac{SE}{\sqrt{\frac{1}{\text{Total sample size in intervention groups}} + \frac{1}{\text{Total sample size in control groups}}}}$$

Total sample size in intervention groups=2451

Total sample size in control groups=2547

SD=5284.3686



Table 1: Sample size in intervention and control groups for the 21 studies with daily step counts as an outcome

| First author, year | Sample size (intervention) | Sample size (control) |
|--------------------|----------------------------|-----------------------|
| Wyke, 2019         | 464                        | 471                   |
| Pope, 2018         | 19                         | 19                    |
| Ashton, 2017       | 24                         | 23                    |
| Brakenridge, 2016  | 66                         | 87                    |
| Poirier, 2016      | 107                        | 110                   |
| Ashe, 2015         | 13                         | 12                    |
| Martin, 2015       | 16                         | 16                    |
| Thorndike, 2014    | 50                         | 49                    |
| Patel, 2019        | 150                        | 151                   |
| Ellingson, 2019    | 45                         | 46                    |
| Zhang, 2019        | 44                         | 47                    |
| Patel, 2018        | 44                         | 65                    |
| Robinson, 2018     | 14                         | 11                    |
| Patel, 2017        | 98                         | 102                   |
| John, 2016         | 1027                       | 1028                  |
| Melton, 2016       | 28                         | 41                    |
| Patel, 2016 I      | 80                         | 68                    |
| Patel, 2016 II     | 64                         | 100                   |
| Walsh, 2016        | 28                         | 27                    |
| Wang, 2015         | 33                         | 34                    |
| Glynn, 2014        | 37                         | 40                    |
| Total sample size  | 2451                       | 2547                  |

### 3) Using the SD to extrapolate the difference in means in the 28 studies from the standardized difference in means

Standardized difference in means= Difference in means/SD

Difference in means= Standardized difference in means\*SD

Difference in means=0.35\*5284.3686

Difference in means=1849.53 steps/day

**Supplement 6: eMethods 5. Sensitivity analyses conducted**

Seven sensitivity analyses were conducted:

- 1) a sensitivity analysis excluding studies with a sample size lower than the median of 99 participants;
- 2) an analysis including only studies with 4 or more low risk of bias categories from Cochrane's risk of bias tool;
- 3) an analysis including only primary outcomes;
- 4) a) an analysis based on outcome type according to the outcomes in the main analysis [daily step count, moderate-to-vigorous physical activity (MVPA), or other];
- 4) b) an analysis based on outcome type for all studies reporting a given outcome (outcomes reported in at least 5 studies)
- 5) an analysis based on outcome measurement (research-grade accelerometer; tracker or mobile app; self-reported);
- 6) an analysis including the longest follow-up available, where the mean duration of the 28 studies increased to 18 weeks (4.5 months);
- 7) an analysis including studies with a true control (no smartphone app or tracker component)

### **Supplement 7: eMethods 6. Subgroup analyses and meta-regression, with differences from protocol**

Planned subgroup analyses included: type of comparator (with or without a mobile app or an activity tracker); technology components (e.g. app, tracker, text-messaging); behaviour change techniques (according to the BCT taxonomy v1 of 93 BCTs); type of outcome included in the meta-analysis (defined by the authors as the primary outcome or not); measurement of outcome (self-reported versus objective measurement); study duration; and risk of bias.

Subgroup analyses as pre-specified in the protocol:

“We will explore the cause of any observed statistical heterogeneity using subgroup analysis. Planned subgroup analysis include: type of outcome (physical activity, diet, weight), measurement of outcome (self-reported versus objective measurement), intention-to-treat versus per protocol analysis, type of mobile technology (e.g. smartphone, tablet, mobile application, monitoring device), study duration, behaviour change techniques (according to the Behaviour Change Technique (BCT) taxonomy v1 of 93 BCTs), risk of bias (low versus high), and type of comparator [‘no intervention’ versus active control (meeting criteria for ‘smart mobile health intervention’ or not)].”

Post-hoc subgroup analyses included: target population (physically inactive or sedentary; overweight or obese); personalisation features [explicitly mentioned by the authors using the term personalisation or related words and synonyms (e.g. tailoring, customisation, individualisation, adaptive intervention)]; human involvement in the intervention (i.e. face-to-face and phone call components); presence of an online social network<sup>1</sup>; and gamification (i.e. the use of game design elements in non-game contexts<sup>2</sup>). We conducted subgroup analysis for categorical variables where each subgroup had at least 5 studies; overall, 27 subgroup analyses were conducted.

Although this study contained no direct consumer involvement, post-hoc subgroup analyses were informed by previous work where consumer perspectives and needs in a physical activity intervention were explored<sup>3</sup>.

1. Laranjo L, Arguel A, Neves AL, et al. The influence of social networking sites on health behavior change: a systematic review and meta-analysis. *J Am Med Inform Assoc* 2015;22(1):243-56.
2. Deterding S, Dixon D, Khaled R, et al. From game design elements to gamefulness: defining "gamification". Proceedings of the 15th International Academic MindTrek Conference: Envisioning Future Media Environments. Tampere, Finland: ACM, 2011:9-15.
3. Tong HL, Coiera E, Laranjo L. Using a Mobile Social Networking App to Promote Physical Activity: A Qualitative Study of Users' Perspectives. *J Med Internet Res* 2018;20(12):e11439.

**Supplement 8: eResults 1. List of articles excluded after full-text review for not meeting inclusion criteria regarding the population, intervention, outcome or study design****Population:**

1. Krein SL, Abdul-Wahab Y, Kadri R, Richardson CR. Adverse events experienced by participants in a back pain walking intervention: A descriptive study. *Chronic illness*. 2016;12(1):71-80.
2. Krein SL. Opioid use and walking among patients with chronic low back pain. *Journal of Rehabilitation Research & Development*. 2016;53(1).
3. Krein SL, Kadri R, Hughes M, Kerr EA, Piette JD, Holleman R, et al. Pedometer-based internet-mediated intervention for adults with chronic low back pain: randomized controlled trial. *Journal of medical Internet research*. 2013;15(8).
4. Krein SL, Metreger T, Kadri R, Hughes M, Kerr EA, Piette JD, et al. Veterans walk to beat back pain: study rationale, design and protocol of a randomized trial of a pedometer-based internet mediated intervention for patients with chronic low back pain. *BMC musculoskeletal disorders*. 2010;11(1):205.
5. Neil Thomas G, Macfarlane DJ, Guo B, Cheung BM, McGhee SM, Chou K-L, et al. Health promotion in older Chinese: A 12-month cluster randomized controlled trial of pedometry and peer support. *Medicine and science in sports and exercise*. 2012.
6. Richardson CR, Buis LR, Janney AW, Goodrich DE, Sen A, Hess ML, et al. An online community improves adherence in an internet-mediated walking program. Part 1: results of a randomized controlled trial. *Journal of medical Internet research*. 2010;12(4).
7. Ma J, Yank V, Lv N, Goldhaber-Fiebert JD, Lewis MA, Kramer MK, et al. Research aimed at improving both mood and weight (RAINBOW) in primary care: A type 1 hybrid design randomized controlled trial. *Contemporary clinical trials*. 2015;43:260-78.
8. Garcia-Ortiz L, Recio-Rodriguez JJ, Agudo-Conde C, Patino-Alonso MC, Maderuelo-Fernandez JA, Gento IR, Puig EP, Gonzalez-Viejo N, Arietealanizbeaskoa MS, Schmolling-Guinovart Y, Gomez-Marcos MA. Long-term effectiveness of a smartphone app for improving healthy lifestyles in general population in primary care: randomized controlled trial (Evident II study). *JMIR mHealth and uHealth*. 2018;6(4):e107.
9. Direito A, Jiang Y, Whittaker R, Maddison R. Apps for IMproving FITness and increasing physical activity among young people: the AIMFIT pragmatic randomized controlled trial. *Journal of medical Internet research*. 2015;17(8):e210.

**Intervention:**

10. Forman EM, Shaw JA, Goldstein SP, Butryn ML, Martin LM, Meiran N, et al. Mindful decision making and inhibitory control training as complementary means to decrease snack consumption. *Appetite*. 2016;103:176-83.
11. Kerr DA, Harray AJ, Pollard CM, Dhaliwal SS, Delp EJ, Howat PA, et al. The connecting health and technology study: a 6-month randomized controlled trial to improve nutrition behaviours using a mobile food record and text messaging support in young adults. *International Journal of Behavioral Nutrition and Physical Activity*. 2016;13(1):52.
12. Nishiwaki M, Kuriyama A, Ikegami Y, Nakashima N, Matsumoto N. A pilot crossover study: effects of an intervention using an activity monitor with computerized game functions on physical activity and body composition. *Journal of physiological anthropology*. 2014;33(1):35.
13. Naimark JS, Madar Z, Shahar DR. The impact of a Web-based app (eBalance) in promoting healthy lifestyles: randomized controlled trial. *Journal of medical Internet research*. 2015;17(3).
14. Vitamin K. Patient-oriented evidence that matters. *Fam Med*. 2008;6(1):69-77.
15. Adams MA, Sallis JF, Norman GJ, Hovell MF, Hekler EB, Perata E. An adaptive physical activity intervention for overweight adults: a randomized controlled trial. *PloS one*. 2013;8(12):e82901.

16. Aittasalo M, Miilunpalo S, Kukkonen-Harjula K, Pasanen M. A randomized intervention of physical activity promotion and patient self-monitoring in primary health care. *Preventive Medicine*. 2006;42(1):40-6.
17. Aittasalo M, Rinne M, Pasanen M, Kukkonen-Harjula K, Vasankari T. Promoting walking among office employees—evaluation of a randomized controlled intervention with pedometers and e-mail messages. *BMC Public Health*. 2012;12(1):403.
18. Andrade LF, Barry D, Litt MD, Petry NM. Maintaining high activity levels in sedentary adults with a reinforcement-thinning schedule. *Journal of applied behavior analysis*. 2014;47(3):523-36.
19. Anson D, Madras D. Do low step count goals inhibit walking behavior: a randomized controlled study. *Clinical rehabilitation*. 2016;30(7):676-85.
20. Armit CM, Brown WJ, Marshall AL, Ritchie CB, Trost SG, Green A, et al. Randomized trial of three strategies to promote physical activity in general practice. *Preventive medicine*. 2009;48(2):156-63.
21. Ribeiro MA, Martins MA, Carvalho CR. Interventions to increase physical activity in middle-age women at the workplace: a randomized controlled trial. *Medicine & Science in Sports & Exercise*. 2014;46(5):1008-15.
22. Baker G, Gray SR, Wright A, Fitzsimons C, Nimmo M, Lowry R, et al. The effect of a pedometer-based community walking intervention "Walking for Wellbeing in the West" on physical activity levels and health outcomes: a 12-week randomized controlled trial. *International Journal of Behavioral Nutrition and Physical Activity*. 2008;5(1):44.
23. Baker G, Mutrie N, Lowry R. Using pedometers as motivational tools: Are goals set in steps more effective than goals set in minutes for increasing walking? *International Journal of Health Promotion and Education*. 2008;46(1):21-6.
24. Baker G, Mutrie N, Lowry R. A comparison of goals set in steps using a pedometer and goals set in minutes: A randomized controlled trial. *International Journal of Health Promotion and Education*. 2011;49(2):60-8.
25. Bell GJ, Harber V, Murray T, Courneya KS, Rodgers W. A comparison of fitness training to a pedometer-based walking program matched for total energy cost. *Journal of Physical Activity and Health*. 2010;7(2):203-13.
26. Blackford K, Jancey J, Lee AH, James AP, Howat P, Hills AP, et al. A randomised controlled trial of a physical activity and nutrition program targeting middle-aged adults at risk of metabolic syndrome in a disadvantaged rural community. *BMC Public Health*. 2015;15(1):284.
27. Blomfield RL, Collins CE, Hutchesson MJ, Young MD, Jensen ME, Callister R, et al. Impact of self-help weight loss resources with or without online support on the dietary intake of overweight and obese men: The SHED-IT randomised controlled trial. *Obesity research & clinical practice*. 2014;8(5):e476-e87.
28. Brindal E, Hendrie GA, Taylor P, Freyne J, Noakes M. Cohort analysis of a 24-week randomized controlled trial to assess the efficacy of a novel, partial meal replacement program targeting weight loss and risk factor reduction in overweight/obese adults. *Nutrients*. 2016;8(5):265.
29. Carr LJ, Karvinen K, Peavler M, Smith R, Cangelosi K. Multicomponent intervention to reduce daily sedentary time: a randomised controlled trial. *BMJ open*. 2013;3(10):e003261.
30. Cayir Y, Aslan SM, Akturk Z. The effect of pedometer use on physical activity and body weight in obese women. *European journal of sport science*. 2015;15(4):351-6.
31. Compennolle S, Vandelanotte C, Cardon G, De Bourdeaudhuij I, De Cocker K. Effectiveness of a web-based, computer-tailored, pedometer-based physical activity intervention for adults: a cluster randomized controlled trial. *Journal of medical Internet research*. 2015;17(2).
32. Cooke PA, Tully MA, Cupples ME, Gilliland AE, Gormley GJ. A randomised control trial of experiential learning to promote physical activity. *Education for Primary Care*. 2013;24(6):427-35.

33. Creel DB, Schuh LM, Reed CA, Gomez AR, Hurst LA, Stote J, et al. A randomized trial comparing two interventions to increase physical activity among patients undergoing bariatric surgery. *Obesity*. 2016;24(8):1660-8.
34. Dawes D, Ashe M, Campbell K, Cave D, Elley CR, Kaczorowski J, et al. Preventing diabetes in primary care: a feasibility cluster randomized trial. *Canadian journal of diabetes*. 2015;39(2):111-6.
35. De Cocker K, De Bourdeaudhuij I, Cardon G, Vandelanotte C. The effectiveness of a web-based computer-tailored intervention on workplace sitting: a randomized controlled trial. *Journal of medical Internet research*. 2016;18(5).
36. De Cocker K, Spittaels H, Cardon G, De Bourdeaudhuij I, Vandelanotte C. Web-based, computer-tailored, pedometer-based physical activity advice: development, dissemination through general practice, acceptability, and preliminary efficacy in a randomized controlled trial. *Journal of medical Internet research*. 2012;14(2).
37. Dorrough AE, Winett RA, Anderson ES, Davy BM, Martin EC, Hedrick V. Dash to wellness: Emphasizing self-regulation through e-health in adults with prehypertension. *Health Psychology*. 2014;33(3):249.
38. Eastep E, Beveridge S, Eisenman P, Ransdell L, Shultz B. Does augmented feedback from pedometers increase adults' walking behavior? Perceptual and motor skills. 2004;99(2):392-402.
39. Godino JG, Watkinson C, Corder K, Marteau TM, Sutton S, Sharp SJ, et al. Impact of personalised feedback about physical activity on change in objectively measured physical activity (the FAB study): a randomised controlled trial. *PloS one*. 2013;8(9):e75398.
40. Júdice PB, Santos DA, Hamilton MT, Sardinha LB, Silva AM. Validity of GT3X and Actiheart to estimate sedentary time and breaks using ActivPAL as the reference in free-living conditions. *Gait & posture*. 2015;41(4):917-22.
41. Kangasniemi AM, Lappalainen R, Kankaanpää A, Tolvanen A, Tammelin T. Towards a physically more active lifestyle based on one's own values: the results of a randomized controlled trial among physically inactive adults. *BMC public health*. 2015;15(1):260.
42. Katzmarzyk PT, Champagne CM, Tudor-Locke C, Broyles ST, Harsha D, Kennedy BM, et al. A short-term physical activity randomized trial in the Lower Mississippi Delta. *PLoS One*. 2011;6(10):e26667.
43. Keegan RD, Oliver MC, Stanfill TJ, Stevens KV, Brown GR, Ebinger M, et al. Use of a mobile device simulation as a preclass active learning exercise. *Journal of Nursing Education*. 2016;55(1):56-9.
44. Keller C, Fleury J, Perez A, Belyea M, Castro FG. Mujeres en acción: Design and baseline data. *Journal of community health*. 2011;36(5):703-14.
45. Kovelis D, Zabatiero J, Furlanetto KC, Mantoani LC, Proença M, Pitta F. Short-term effects of using pedometers to increase daily physical activity in smokers: a randomized trial. *Respiratory care*. 2012;57(7):1089-97.
46. Lavoie-Tremblay M, Sounan C, Trudel JG, Lavigne GL, Martin K, Lowensteyn I. Impact of a pedometer program on nurses working in a health-promoting hospital. *The health care manager*. 2014;33(2):172-80.
47. Ma J, Yank V, Xiao L. Can a practical and scalable lifestyle intervention produce meaningful weight loss in primary care patients? *JCOM*. 2013;20(5).
48. Nakata Y, Okada M, Hashimoto K, Harada Y, Sone H, Tanaka K. Comparison of education-only versus group-based intervention in promoting weight loss: a randomised controlled trial. *Obesity facts*. 2011;4(3):222-8.
49. Nanchahal K, Power T, Holdsworth E, Hession M, Sorhaindo A, Griffiths U, et al. A pragmatic randomised controlled trial in primary care of the Camden Weight Loss (CAMWEL) programme. *BMJ open*. 2012;2(3):e000793.
50. Ornes L, Ransdell LB. Web-Based Physical Activity Intervention for College-Aged Women. *International Electronic Journal of Health Education*. 2007;10:126-37.

51. Pal S, Cheng C, Ho S. The effect of two different health messages on physical activity levels and health in sedentary overweight, middle-aged women. *BMC public health*. 2011;11(1):204.
52. Parry S, Straker L, Gilson ND, Smith AJ. Participatory workplace interventions can reduce sedentary time for office workers—a randomised controlled trial. *PloS one*. 2013;8(11):e78957.
53. Partridge SR, Allman-Farinelli M, McGeechan K, Balestracci K, Wong AT, Hebden L, et al. Process evaluation of TXT2BFiT: a multi-component mHealth randomised controlled trial to prevent weight gain in young adults. *International Journal of Behavioral Nutrition and Physical Activity*. 2016;13(1):7.
54. Pears S, Bijker M, Morton K, Vasconcelos J, Parker RA, Westgate K, et al. A randomised controlled trial of three very brief interventions for physical activity in primary care. *BMC public health*. 2016;16(1):1033.
55. Petersen CB, Severin M, Hansen AW, Curtis T, Grønbaek M, Tolstrup JS. A population-based randomized controlled trial of the effect of combining a pedometer with an intervention toolkit on physical activity among individuals with low levels of physical activity or fitness. *Preventive medicine*. 2012;54(2):125-30.
56. Prestwich A, Conner M, Hurling R, Ayres K, Morris B. An experimental test of control theory-based interventions for physical activity. *British journal of health psychology*. 2016;21(4):812-26.
57. Puig-Ribera A, McKenna J, Gilson N, Brown WJ. Change in work day step counts, wellbeing and job performance in Catalan university employees: a randomised controlled trial. *Promotion & education*. 2008;15(4):11-6.
58. Racette SB, Deusinger SS, Inman CL, Burlis TL, Highstein GR, Buskirk TD, et al. Worksite Opportunities for Wellness (WOW): effects on cardiovascular disease risk factors after 1 year. *Preventive medicine*. 2009;49(2-3):108-14.
59. Racette SB, Weiss EP, Schechtman KB, Steger-May K, Villareal DT, Obert KA, et al. Influence of weekend lifestyle patterns on body weight. *Obesity*. 2008;16(8):1826-30.
60. Rangan VV, Willis LH, Slentz CA, Bateman LA, Shields AT, Houmard JA, et al. Effects of an 8-month exercise training program on off-exercise physical activity. *Medicine and science in sports and exercise*. 2011;43(9):1744.
61. Ransdell LB, Robertson L, Ornes L, Moyer-Mileur L. Generations exercising together to improve fitness (GET FIT): a pilot study designed to increase physical activity and improve health-related fitness in three generations of women. *Women & health*. 2005;40(3):77-94.
62. Rodgers RF, Pernal W, Matsumoto A, Shiyko M, Intille S, Franko DL. Capitalizing on mobile technology to support healthy eating in ethnic minority college students. *Journal of American College Health*. 2016;64(2):125-32.
63. Rossen J, Yngve A, Hagströmer M, Brismar K, Ainsworth BE, Iskull C, et al. Physical activity promotion in the primary care setting in pre-and type 2 diabetes-the Sophia step study, an RCT. *BMC public health*. 2015;15(1):647.
64. Rote AE. Examining the efficacy of a facebook-mediated intervention to increase steps per day in college freshmen. Wisconsin: University of Wisconsin-Milwaukee; 2013.
65. Rote AE, Klos LA, Brondino MJ, Harley AE, Swartz AM. The efficacy of a walking intervention using social media to increase physical activity: a randomized trial. *Journal of Physical Activity and Health*. 2015;12(6 Suppl 1):S18-S25.
66. Rovniak LS, Kong L, Hovell MF, Ding D, Sallis JF, Ray CA, et al. Engineering online and in-person social networks for physical activity: a randomized trial. *Annals of Behavioral Medicine*. 2016;50(6):885-97.
67. Rowe-Roberts D, Cercos R. Preliminary results from a study of the impact of digital activity trackers on health risk status. *Studies in health technology and informatics*. 2014;204:143-8.



68. Schneider KL, Murphy D, Ferrara C, Oleski J, Panza E, Savage C, et al. An online social network to increase walking in dog owners: a randomized trial. *Medicine and science in sports and exercise*. 2015;47(3):631.
69. Sharp P, Caperchione C. The effects of a pedometer-based intervention on first-year university students: A randomized control trial. *Journal of American college health*. 2016;64(8):630-8.
70. Sherwood NE, Martinson BC, Crain AL, Hayes MG, Pronk NP, O'Connor PJ. A new approach to physical activity maintenance: rationale, design, and baseline data from the Keep Active Minnesota Trial. *BMC geriatrics*. 2008;8(1):17.
71. Tiessen AH, Smit AJ, Broer J, Groenier KH, van der Meer K. Randomized controlled trial on cardiovascular risk management by practice nurses supported by self-monitoring in primary care. *BMC family practice*. 2012;13(1):90.
72. Yates T, Davies M, Gorely T, Bull F, Khunti K. Effectiveness of a pragmatic education programme aimed at promoting walking activity in individuals with impaired glucose tolerance: a randomized controlled trial. *Diabetes care*. 2009.
73. Young MD, Lubans DR, Collins CE, Callister R, Plotnikoff RC, Morgan PJ. Behavioral mediators of weight loss in the SHED-IT community randomized controlled trial for overweight and obese men. *Annals of Behavioral Medicine*. 2014;49(2):286-92.
74. Young MD, Callister R, Collins CE, Plotnikoff RC, Aguiar EJ, Morgan PJ. Efficacy of a gender-tailored intervention to prevent weight regain in men over 3 years: A weight loss maintenance RCT. *Obesity*. 2017;25(1):56-65.
75. Lubans DR, Morgan PJ, Collins CE, Warren JM, Callister R. Exploring the mechanisms of weight loss in the SHED-IT intervention for overweight men: a mediation analysis. *International Journal of Behavioral Nutrition and Physical Activity*. 2009;6(1):76.
76. Luley C, Blaik A, Götz A, Kicherer F, Kropf S, Isermann B, et al. Weight loss by telemonitoring of nutrition and physical activity in patients with metabolic syndrome for 1 year. *Journal of the American College of Nutrition*. 2014;33(5):363-74.
77. Madjd A, Taylor MA, Shafiei Neek L, Delavari A, Malekzadeh R, Macdonald IA, et al. Effect of weekly physical activity frequency on weight loss in healthy overweight and obese women attending a weight loss program: a randomized controlled trial. *The American journal of clinical nutrition*. 2016;104(5):1202-8.
78. Maher C, Ferguson M, Vandelanotte C, Plotnikoff R, De Bourdeaudhuij I, Thomas S, et al. A web-based, social networking physical activity intervention for insufficiently active adults delivered via Facebook app: randomized controlled trial. *Journal of medical Internet research*. 2015;17(7).
79. Marcus BH, Hartman SJ, Larsen BA, Pekmezi D, Dunsiger SI, Linke S, et al. Pasos Hacia La Salud: a randomized controlled trial of an internet-delivered physical activity intervention for Latinas. *International Journal of Behavioral Nutrition and Physical Activity*. 2016;13(1):62.
80. Marcus BH, Lewis BA, Williams DM, Whiteley JA, Albrecht AE, Jakicic JM, et al. Step into Motion: a randomized trial examining the relative efficacy of Internet vs. print-based physical activity interventions. *Contemporary clinical trials*. 2007;28(6):737-47.
81. Marsaux CF, Celis-Morales C, Fallaize R, Macready AL, Kolossa S, Woolhead C, et al. Effects of a web-based personalized intervention on physical activity in European adults: a randomized controlled trial. *Journal of medical Internet research*. 2015;17(10).
82. Matevey C, Rogers LQ, Dawson E, Tudor-Locke C. Lack of reactivity during pedometer self-monitoring in adults. *Measurement in physical education and exercise science*. 2006;10(1):1-11.
83. Maturi MS, Afshary P, Abedi P. Effect of physical activity intervention based on a pedometer on physical activity level and anthropometric measures after childbirth: a randomized controlled trial. *BMC pregnancy and childbirth*. 2011;11(1):103.



84. Merom D, Rissel C, Phongsavan P, Smith BJ, Van Kemenade C, Brown WJ, et al. Promoting walking with pedometers in the community: the step-by-step trial. *American Journal of Preventive Medicine*. 2007;32(4):290-7.
85. Morgan PJ, Callister R, Collins CE, Plotnikoff RC, Young MD, Berry N, et al. The SHED-IT community trial: a randomized controlled trial of internet-and paper-based weight loss programs tailored for overweight and obese men. *Annals of Behavioral Medicine*. 2012;45(2):139-52.
86. Pasco D, Roure C, Kermarrec G, Pope Z, Gao Z. The effects of a bike active video game on players' physical activity and motivation. *Journal of Sport and Health Science*. 2017 Mar 1;6(1):25-32
87. Hurling R, Catt M, De Boni M, Fairley B, Hurst T, Murray P, Richardson A, Sodhi J. Using internet and mobile phone technology to deliver an automated physical activity program: randomized controlled trial. *Journal of medical Internet research*. 2007;9(2):e7
88. Watson A, Bickmore T, Cange A, Kulshreshtha A, Kvedar J. An internet-based virtual coach to promote physical activity adherence in overweight adults: randomized controlled trial. *Journal of medical Internet research*. 2012;14(1):e1
89. Mascarenhas MN, Chan JM, Vittinghoff E, Van Blarigan EL, Hecht F. Increasing Physical Activity in Mothers Using Video Exercise Groups and Exercise Mobile Apps: Randomized Controlled Trial. *Journal of medical Internet research*. 2018;20(5):e179
90. Voth EC, Oelke ND, Jung ME. A theory-based exercise app to enhance exercise adherence: a pilot study. *JMIR mHealth and uHealth*. 2016;4(2):e62
91. Ehlers DK, Huberty JL, de Vreede GJ. Can an evidence-based book club intervention delivered via a tablet computer improve physical activity in middle-aged women?. *Telemedicine and e-Health*. 2015 Feb 1;21(2):125-31
92. Knight E, Stuckey MI, Petrella RJ. Health promotion through primary care: enhancing self-management with activity prescription and mHealth. *The Physician and sportsmedicine*. 2014 Sep 1;42(3):90-9.
93. Van Hove K, Boen F, Lefevre J. The impact of different degrees of feedback on physical activity levels: A 4-Week intervention study. *International journal of environmental research and public health*. 2015 Jun;12(6):6561-81
94. Adams MA, Hurley JC, Todd M, Bhuiyan N, Jarrett CL, Tucker WJ, Hollingshead KE, Angadi SS. Adaptive goal setting and financial incentives: a 2x2 factorial randomized controlled trial to increase adults' physical activity. *BMC public health*. 2017 Dec;17(1):286
95. Kolbe-Alexander TL, Van Mechelen W, Proper KI, Lambert EV, Pillay JD. Steps that count! A feasibility study of a pedometer-based, health-promotion intervention in an employed, South African population. *South African Journal of Sports Medicine*. 2014 Apr 1;26(1):15-9.
96. Corsaletti BF, Proença MD, Bisca GK, Leite JC, Bellinetti LM, Pitta F. Minimal important difference for anxiety and depression surveys after intervention to increase daily physical activity in smokers. *Fisioterapia e Pesquisa*. 2014 Dec;21(4):359-64.
97. Miragall M, Domínguez A, Cebolla A, Baños RM. El uso de podómetros para incrementar la actividad física en población adulta: una revisión. *Clínica y Salud*. 2015 Jul;26(2):81-9.
98. LeCheminant JD, Smith JD, Covington NK, Hardin-Renschen T, Heden T. Pedometer use in university freshmen: a randomized controlled pilot study. *American journal of health behavior*. 2011 Nov 4;35(6):777-84
99. Burke LE, Styn MA, Sereika SM, Conroy MB, Ye L, Glanz K, Sevic MA, Ewing LJ. Using mHealth technology to enhance self-monitoring for weight loss: a randomized trial. *American journal of preventive medicine*. 2012 Jul 1;43(1):20-6.
100. Spring B, Duncan JM, Janke EA, Kozak AT, McFadden HG, DeMott A, Pictor A, Epstein LH, Siddique J, Pellegrini CA, Buscemi J. Integrating technology into standard weight loss treatment: a randomized controlled trial. *JAMA internal medicine*. 2013 Jan 28;173(2):105-11.
101. Burke LE, Conroy MB, Sereika SM, Elci OU, Styn MA, Acharya SD, Sevic MA, Ewing LJ, Glanz K. The effect of electronic self-monitoring on weight loss and dietary intake: a randomized behavioral weight loss trial. *Obesity*. 2011 Feb;19(2):338-44.
102. Spring B, Schneider K, McFadden HG, Vaughn J, Kozak AT, Smith M, Moller AC, Epstein LH, DeMott A, Hedeker D, Siddique J. Multiple behavior changes in diet and activity: a randomized controlled trial using mobile technology. *Archives of internal medicine*. 2012 May 28;172(10):789-96.
103. McDaniel SO, Wolskee P, Shen J. Treating obesity with a novel hand-held device, computer software program, and Internet technology in primary care: the SMART motivational trial. *Patient education and counseling*. 2010 May 1;79(2):185-91.

104. Acharya SD, Elci OU, Sereika SM, Styn MA, Burke LE. Using a personal digital assistant for self-monitoring influences diet quality in comparison to a standard paper record among overweight/obese adults. *Journal of the American Dietetic Association*. 2011 Apr 1;111(4):583-8.
105. King AC, Ahn DK, Oliveira BM, Atienza AA, Castro CM, Gardner CD. Promoting physical activity through hand-held computer technology. *American journal of preventive medicine*. 2008 Feb 1;34(2):138-42.
106. Patrick K, Raab F, Adams M, Dillon L, Zabinski M, Rock C, Griswold W, Norman G. A text message-based intervention for weight loss: randomized controlled trial. *Journal of medical Internet research*. 2009;11(1):e1.
107. Müller AM, Khoo S, Morris T. Text messaging for exercise promotion in older adults from an upper-middle-income country: randomized controlled trial. *Journal of medical Internet research*. 2016;18(1):e5.
108. Wijsman CA, Westendorp RG, Verhagen EA, Catt M, Slagboom PE, de Craen AJ, Broekhuizen K, van Mechelen W, van Heemst D, van der Ouderaa F, Mooijaart SP. Effects of a web-based intervention on physical activity and metabolism in older adults: randomized controlled trial. *Journal of medical Internet research*. 2013;15(11):e233.
109. Mattila E, Orsama AL, Ahtinen A, Hopsu L, Leino T, Korhonen I. Personal health technologies in employee health promotion: usage activity, usefulness, and health-related outcomes in a 1-year randomized controlled trial. *JMIR mHealth and uHealth*. 2013;1(2):e16.
110. Nicklas BJ, Gaukstern JE, Beavers KM, Newman JC, Leng X, Rejeski WJ. Self-monitoring of spontaneous physical activity and sedentary behavior to prevent weight regain in older adults. *Obesity*. 2014 Jun;22(6):1406-12.
111. Reijonsaari K, Vehtari A, Kahilakoski OP, van Mechelen W, Aro T, Taimela S. The effectiveness of physical activity monitoring and distance counseling in an occupational setting—Results from a randomized controlled trial (CoAct). *BMC Public Health*. 2012 Dec;12(1):344.
112. Silveira P, Van De Langenberg R, Van Het Reve E, Daniel F, Casati F, De Bruin ED. Tablet-based strength-balance training to motivate and improve adherence to exercise in independently living older people: a phase II preclinical exploratory trial. *Journal of medical Internet research*. 2013;15(8):e159.
113. Barwais FA, Cuddihy TF, Tomson LM. Physical activity, sedentary behavior and total wellness changes among sedentary adults: a 4-week randomized controlled trial. *Health and quality of life outcomes*. 2013 Dec;11(1):183.
114. Biddle SJ, Edwardson CL, Wilmot EG, Yates T, Gorely T, Bodicoat DH, Ashra N, Khunti K, Nimmo MA, Davies MJ. A randomised controlled trial to reduce sedentary time in young adults at risk of type 2 diabetes mellitus: project STAND (Sedentary Time ANd Diabetes). *PLoS One*. 2015 Dec 1;10(12):e0143398.
115. Slootmaker S, Chinapaw M, Schuit A, Seidell J, Van Mechelen W. Feasibility and effectiveness of online physical activity advice based on a personal activity monitor: randomized controlled trial. *Journal of medical Internet research*. 2009;11(3):e27.

## Outcome:

116. Morrison LG, Hargood C, Lin SX, Dennison L, Joseph J, Hughes S, et al. Understanding usage of a hybrid website and smartphone app for weight management: a mixed-methods study. *Journal of medical Internet research*. 2014;16(10).
117. van Drongelen A, Boot CR, Hlobil H, Twisk JW, Smid T, van der Beek AJ. Evaluation of an mHealth intervention aiming to improve health-related behavior and sleep and reduce fatigue among airline pilots. *Scandinavian journal of work, environment & health*. 2014;557-68.
118. Block G, Azar KM, Romanelli RJ, Block TJ, Hopkins D, Carpenter HA, Dolginsky MS, Hudes ML, Palaniappan LP, Block CH. Diabetes prevention and weight loss with a fully automated behavioral intervention by email, web, and mobile phone: a randomized controlled trial among persons with prediabetes. *Journal of medical Internet research*. 2015;17(10):e240.
119. Carter MC, Burley VJ, Nykjaer C, Cade JE. Adherence to a smartphone application for weight loss compared to website and paper diary: pilot randomized controlled trial. *Journal of medical Internet research*. 2013;15(4):e32.
120. Fukuoka Y, Gay CL, Joiner KL, Vittinghoff E. A novel diabetes prevention intervention using a mobile app: a randomized controlled trial with overweight adults at risk. *American journal of preventive medicine*. 2015 Aug 1;49(2):223-37.

121. Godino JG, Merchant G, Norman GJ, Donohue MC, Marshall SJ, Fowler JH, Calfas KJ, Huang JS, Rock CL, Griswold WG, Gupta A. Using social and mobile tools for weight loss in overweight and obese young adults (Project SMART): a 2 year, parallel-group, randomised, controlled trial. *The Lancet Diabetes & Endocrinology*. 2016 Sep 1;4(9):747-55.
122. Hales S, Turner-McGrievy GM, Wilcox S, Fahim A, Davis RE, Huhns M, Valafar H. Social networks for improving healthy weight loss behaviors for overweight and obese adults: a randomized clinical trial of the social pounds off digitally (Social POD) mobile app. *International journal of medical informatics*. 2016 Oct 1;94:81-90.
123. Hartman SJ, Nelson SH, Cadmus-Bertram LA, Patterson RE, Parker BA, Pierce JP. Technology-and phone-based weight loss intervention: pilot RCT in women at elevated breast cancer risk. *American journal of preventive medicine*. 2016 Nov 1;51(5):714-21.
124. Hebden L, Cook A, Van der Ploeg HP, King L, Bauman A, Allman-Farinelli M. A mobile health intervention for weight management among young adults: a pilot randomised controlled trial. *Journal of Human Nutrition and Dietetics*. 2014 Aug;27(4):322-32.
125. Jakicic JM, Davis KK, Rogers RJ, King WC, Marcus MD, Helsel D, Rickman AD, Wahed AS, Belle SH. Effect of wearable technology combined with a lifestyle intervention on long-term weight loss: the IDEA randomized clinical trial. *Jama*. 2016 Sep 20;316(11):1161-71.
126. Laing BY, Mangione CM, Tseng CH, Leng M, Vaisberg E, Mahida M, Bholat M, Glazier E, Morisky DE, Bell DS. Effectiveness of a smartphone application for weight loss compared with usual care in overweight primary care patients: a randomized, controlled trial. *Annals of internal medicine*. 2014 Nov 18;161(10\_Supplement):S5-12.
127. Martin CK, Miller AC, Thomas DM, Champagne CM, Han H, Church T. Efficacy of Smart LossSM, a smartphone-based weight loss intervention: Results from a randomized controlled trial. *Obesity*. 2015 May;23(5):935-42.
128. Pellegrini CA, Verba SD, Otto AD, Helsel DL, Davis KK, Jakicic JM. The comparison of a technology-based system and an in-person behavioral weight loss intervention. *Obesity*. 2012 Feb;20(2):356-63.
129. Ross KM, Wing RR. Impact of newer self-monitoring technology and brief phone-based intervention on weight loss: a randomized pilot study. *Obesity*. 2016 Aug;24(8):1653-9.
130. Shuger SL, Barry VW, Sui X, McClain A, Hand GA, Wilcox S, Meriwether RA, Hardin JW, Blair SN. Electronic feedback in a diet-and physical activity-based lifestyle intervention for weight loss: a randomized controlled trial. *International Journal of Behavioral Nutrition and Physical Activity*. 2011 Dec;8(1):41.
131. Stephens JD, Yager AM, Allen J. Smartphone technology and text messaging for weight loss in young adults: a randomized controlled trial. *The Journal of cardiovascular nursing*. 2017 Jan;32(1):39.
132. Svetkey LP, Batch BC, Lin PH, Intille SS, Corsino L, Tyson CC, Bosworth HB, Grambow SC, Voils C, Loria C, Gallis JA. Cell phone intervention for you (CITY): a randomized, controlled trial of behavioral weight loss intervention for young adults using mobile technology. *Obesity*. 2015 Nov;23(11):2133-41.
133. Allen JK, Stephens J, Dennison Himmelfarb CR, Stewart KJ, Hauck S. Randomized controlled pilot study testing use of smartphone technology for obesity treatment. *Journal of obesity*. 2013;2013.
134. Greene J, Sacks R, Piniewski B, Kil D, Hahn JS. The impact of an online social network with wireless monitoring devices on physical activity and weight loss. *Journal of primary care & community health*. 2013 Jul;4(3):189-94.
135. Polzien KM, Jakicic JM, Tate DF, Otto AD. The efficacy of a technology-based system in a short-term behavioral weight loss intervention. *Obesity*. 2007 Apr;15(4):825-30.
136. Wharton CM, Johnston CS, Cunningham BK, Sterner D. Dietary self-monitoring, but not dietary quality, improves with use of smartphone app technology in an 8-week weight loss trial. *Journal of nutrition education and behavior*. 2014 Sep 1;46(5):440-4.

137. Rogers RJ, Lang W, Barone Gibbs B, Davis KK, Burke LE, Kovacs SJ, Portzer LA, Jakicic JM. Applying a technology-based system for weight loss in adults with obesity. *Obesity science & practice*. 2016 Mar;2(1):3-12
138. Ipjian ML, Johnston CS. Smartphone technology facilitates dietary change in healthy adults. *Nutrition*. 2017 Jan 1;33:343-7.
139. Recio-Rodriguez JI, Agudo-Conde C, Martin-Cantera C, González-Viejo MN, Fernandez-Alonso MC, Arietealanizbeaskoa MS, Schmolling-Guinovart Y, Maderuelo-Fernandez JA, Rodriguez-Sanchez E, Gomez-Marcos MA, Garcia-Ortiz L. Short-term effectiveness of a mobile phone app for increasing physical activity and adherence to the Mediterranean diet in primary care: a randomized controlled trial (EVIDENT II study). *Journal of medical Internet research*. 2016;18(12):e331
140. Brindal E, Hendrie G, Freyne J, Coombe M, Berkovsky S, Noakes M. Design and pilot results of a mobile phone weight-loss application for women starting a meal replacement programme. *Journal of telemedicine and telecare*. 2013 Apr;19(3):166-74
141. Elbert SP, Dijkstra A, Oenema A. A mobile phone app intervention targeting fruit and vegetable consumption: the efficacy of textual and auditory tailored health information tested in a randomized controlled trial. *Journal of medical Internet research*. 2016;18(6):e147.
142. Kato-Lin YC, Padman R, Downs J, Abhishek V. Evaluating consumer m-health services for promoting healthy eating: A randomized field experiment. In *AMIA Annual Symposium Proceedings 2015* (Vol. 2015, p. 1947). American Medical Informatics Association.
143. Kim C, Draska M, Hess ML, Wilson EJ, Richardson CR. A web-based pedometer programme in women with a recent history of gestational diabetes. *Diabetic Medicine*. 2012 Feb;29(2):278-83
144. Glanz K, Shaw PA, Hoffer K, Chung A, Zhu J, Wu R, Huang QE, Choi JR, Volpp KG. The Healthy Weigh study of lottery-based incentives and environmental strategies for weight loss: Design and baseline characteristics. *Contemporary clinical trials*. 2019 Jan 1;76:24-30
145. Steinberg DM, Tate DF, Bennett GG, Ennett S, Samuel-Hodge C, Ward DS. The efficacy of a daily self-weighing weight loss intervention using smart scales and e-mail. *Obesity*. 2013 Sep;21(9):1789-97
146. Grossman JA, Arigo D, Bachman JL. Meaningful weight loss in obese postmenopausal women: a pilot study of high-intensity interval training and wearable technology. *Menopause*. 2018 Apr 1;25(4):465-70.
147. Balk-Møller NC, Poulsen SK, Larsen TM. Effect of a nine-month web-and app-based workplace intervention to promote healthy lifestyle and weight loss for employees in the social welfare and health care sector: a randomized controlled trial. *Journal of medical Internet research*. 2017;19(4):e108.
148. Inauen J, Bolger N, Shrout PE, Stadler G, Amrein M, Rackow P, Scholz U. Using smartphone-based support groups to promote healthy eating in daily life: A randomised trial. *Applied Psychology: Health and Well-Being*. 2017 Nov;9(3):303-23.
149. Johnston CA, Rost S, Miller-Kovach K, Moreno JP, Foreyt JP. A randomized controlled trial of a community-based behavioral counseling program. *The American journal of medicine*. 2013 Dec 1;126(12):1143-e19.
150. Shin DW, Yun JM, Shin JH, Kwon H, Min HY, Joh HK, Chung WJ, Park JH, Jung KT, Cho B. Enhancing physical activity and reducing obesity through smartcare and financial incentives: a pilot randomized trial. *Obesity*. 2017 Feb;25(2):302-10.
151. Spring B, Pellegrini CA, Pfammatter A, Duncan JM, Pictor A, McFadden HG, Siddique J, Hedeker D. Effects of an abbreviated obesity intervention supported by mobile technology: the ENGAGED randomized clinical trial. *Obesity*. 2017 Jul;25(7):1191-8.
152. Thomas JG, Raynor HA, Bond DS, Luke AK, Cardoso CC, Foster GD, Wing RR. Weight loss in Weight Watchers Online with and without an activity tracking device compared to control: a randomized trial. *Obesity*. 2017 Jun;25(6):1014-21.
153. Turner-McGrievy GM, Wilcox S, Boutté A, Hutto BE, Singletary C, Muth ER, Hoover AW. The Dietary Intervention to Enhance Tracking with Mobile Devices (DIET Mobile) Study: A 6-Month Randomized Weight Loss Trial. *Obesity*. 2017 Aug;25(8):1336-42.
154. Vaz CL, Suthar AG, Pousti BT, Aye SM, Williams KJ, Zhao H. A smartphone app-based lifestyle intervention promotes weight loss—results of a prospective, randomized, controlled clinical trial (RCT).
155. Goldstein SP. Comparing Effectiveness and User Behaviors of Two Versions of a Just-In-Time Adaptive Weight Loss Smartphone App. Drexel University; 2018

- 156.Järvelä-Reijonen E, Karhunen L, Sairanen E, Muotka J, Lindroos S, Laitinen J, Puttonen S, Peuhkuri K, Hallikainen M, Pihlajamäki J, Korpela R. The effects of acceptance and commitment therapy on eating behavior and diet delivered through face-to-face contact and a mobile app: a randomized controlled trial. *international journal of behavioral nutrition and physical activity*. 2018 Dec;15(1):22.
- 157.Mummah SA, Mathur M, King AC, Gardner CD, Sutton S. Mobile technology for vegetable consumption: a randomized controlled pilot study in overweight adults. *JMIR mHealth and uHealth*. 2016;4(2):e51
- 158.Jasper PW, James MT, Hoover AW, Muth ER. Effects of bite count feedback from a wearable device and goal setting on consumption in young adults. *Journal of the Academy of Nutrition and Dietetics*. 2016 Nov 1;116(11):1785-93.
- 159.Palacios C, Torres M, López D, Trak-Fellermeier M, Coccia C, Pérez C. Effectiveness of the Nutritional App “MyNutriCart” on Food Choices Related to Purchase and Dietary Behavior: A Pilot Randomized Controlled Trial. *Nutrients*. 2018 Dec;10(12):1967.
- 160.Liu YC, Chen CH, Lin YS, Chiou WK. Smart Healthcare System in Dietary Behavior Recommendations Based on Physiological Data. *Journal of Medical Imaging and Health Informatics*. 2015 Dec 1;5(8):1826-32.
- 161.Espinoza J, Chen A, Orozco J, Deavenport-Saman A, Yin L. Effect of personal activity trackers on weight loss in families enrolled in a comprehensive behavioral family-lifestyle intervention program in the federally qualified health center setting: A randomized controlled trial. *Contemporary clinical trials communications*. 2017 Sep 1;7:86-94.
- 162.Bennett GG, Steinberg D, Askew S, Levine E, Foley P, Batch BC, Svetkey LP, Bosworth HB, Puleo EM, Brewer A, DeVries A. Effectiveness of an app and provider counseling for obesity treatment in primary care. *American journal of preventive medicine*. 2018 Dec 1;55(6):777-86
- 163.Hurkmans E, Matthys C, Bogaerts A, Scheys L, Devloo K, Seghers J. Face-to-face versus mobile versus blended weight loss program: randomized clinical trial. *JMIR mHealth and uHealth*. 2018;6(1):e14
- 164.Fukuoka Y, Vittinghoff E, Hooper J. A weight loss intervention using a commercial mobile application in Latino Americans—Adelgaza Trial. *Translational behavioral medicine*. 2018 Feb 21;8(5):714-23.
- 165.Monroe CM, Geraci M, Larsen CA, West DS. Feasibility and efficacy of a novel technology-based approach to harness social networks for weight loss: The NETworks pilot randomized controlled trial. *Obesity Science & Practice*.
- 166.Cleghorn C, Wilson N, Nair N, Kvizhinadze G, Nghiem N, McLeod M, Blakely T. Health Benefits and Cost-Effectiveness From Promoting Smartphone Apps for Weight Loss: Multistate Life Table Modeling. *JMIR mHealth and uHealth*. 2019;7(1):e11118
- 167.Kurtzman GW, Day SC, Small DS, Lynch M, Zhu J, Wang W, Rareshide CA, Patel MS. Social incentives and gamification to promote weight loss: the LOSE IT randomized, controlled trial. *Journal of general internal medicine*. 2018 Oct 1;33(10):1669-75.
- 168.Allman-Farinelli M, Partridge SR, McGeechan K, Balestracci K, Hebden L, Wong A, Phongsavan P, Denney-Wilson E, Harris MF, Bauman A. A mobile health lifestyle program for prevention of weight gain in young adults (TXT2BFiT): nine-month outcomes of a randomized controlled trial. *JMIR mHealth and uHealth*. 2016;4(2):e78.
- 169.West DS, Monroe CM, Turner-McGrievy GM, Sundstrom B, Larsen C, Magrader K, Wilcox S, Brandt HM. A technology-mediated behavioral weight gain prevention intervention for college students: controlled, quasi-experimental study. *Journal of medical Internet research*. 2016;18(6):e133.
- 170.Lee J, Kim J. Development and efficacy testing of a social network-based competitive application for weight loss. *TELEMEDICINE and e-HEALTH*. 2016 May 1;22(5):410-8.
- 171.Ayre J, Bonner C, Cvejic E, McCaffery K. Randomized trial of planning tools to reduce unhealthy snacking: Implications for health literacy. *PloS one*. 2019 Jan 17;14(1):e0209863.
- 172.Dunn CG, Turner-McGrievy GM, Wilcox S, Hutto B. Dietary self-monitoring through calorie tracking but not digital photography app is associated with significant weight loss: The 2SMART pilot study, a six-month randomized trial.
- 173.Partridge SR, McGeechan K, Hebden L, Balestracci K, Wong AT, Denney-Wilson E, Harris MF, Phongsavan P, Bauman A, Allman-Farinelli M. Effectiveness of a mHealth lifestyle program with telephone support (TXT2BFiT) to prevent unhealthy weight gain in young adults: randomized controlled trial. *JMIR mHealth and uHealth*. 2015;3(2):e66.



**Study design:**

174. Bond DS, Thomas JG, Raynor HA, Moon J, Sieling J, Trautvetter J, et al. B-MOBILE-A smartphone-based intervention to reduce sedentary time in overweight/obese individuals: a within-subjects experimental trial. *PloS one*. 2014;9(6):e100821.
175. Bushman BA. Promoting Weight Management Using Technology. *ACSM's Health & Fitness Journal*. 2015;19(5):5-8.
176. Buttussi F, Chittaro L. MOPET: A context-aware and user-adaptive wearable system for fitness training. *Artificial Intelligence in Medicine*. 2008;42(2):153-63.
177. Cadmus-Bertram L, Marcus BH, Patterson RE, Parker BA, Morey BL. Use of the Fitbit to measure adherence to a physical activity intervention among overweight or obese, postmenopausal women: self-monitoring trajectory during 16 weeks. *JMIR mHealth and uHealth*. 2015;3(4).
178. Kernot J, Olds T, Lewis LK, Maher C. Effectiveness of a facebook-delivered physical activity intervention for post-partum women: a randomized controlled trial protocol. *BMC Public Health*. 2013;13(1):518.
179. Khalil A, Abdallah S. Harnessing social dynamics through persuasive technology to promote healthier lifestyle. *Computers in Human Behavior*. 2013;29(6):2674-81.
180. Yuenyongchaiwat K. Effects of 10,000 steps a day on physical and mental health in overweight participants in a community setting: a preliminary study. *Brazilian journal of physical therapy*. 2016 (AHEAD):0-.
181. Johnston C, Rost S, Miller-Kovach K. Weight Watchers for the Facebook Era—How Does It Compare to the Do-It-Yourself Approach? *JCOM*. 2014;21(3).
182. Mummah SA, King AC, Gardner CD, Sutton S. Iterative development of Vegethon: a theory-based mobile app intervention to increase vegetable consumption. *International Journal of Behavioral Nutrition and Physical Activity*. 2016;13(1):90.
183. Rosas LG, Lv N, Xiao L, Lewis MA, Zavella P, Kramer MK, et al. Evaluation of a culturally-adapted lifestyle intervention to treat elevated cardiometabolic risk of Latino adults in primary care (Vida Sana): A randomized controlled trial. *Contemporary clinical trials*. 2016;48:30-40.
184. Schrack J, Zipunnikov V, Crainiceanu C. Electronic devices and applications to track physical activity. *Jama*. 2015;313(20):2079-80.
185. Skau JK, Nordin ABA, Cheah JC, Ali R, Zainal R, Aris T, et al. A complex behavioural change intervention to reduce the risk of diabetes and prediabetes in the pre-conception period in Malaysia: study protocol for a randomised controlled trial. *Trials*. 2016;17(1):215.
186. Petrella RJ, Stuckey MI, Shapiro S, Gill DP. Mobile health, exercise and metabolic risk: a randomized controlled trial. *BMC Public Health*. 2014;14(1):1082.
187. Stukenberg E. A Quantitative Pilot Study on the Use of a Fitness Tracker in the Preventative Management of Employees at Risk of Chronic Disease in a Health Care Facility. *On-Line Journal of Nursing Informatics*. 2015;19(3).
188. Madigan CD, Daley AJ, Lewis AL, Jolly K, Aveyard P. Which weight-loss programmes are as effective as Weight Watchers®?: non-inferiority analysis. *Br J Gen Pract*. 2014;64(620):e128-e36.
189. Martin MR, Melnyk J, Zimmerman R. Fitness Apps: Motivating Students to Move: Editor: Brian Mosier. *Journal of Physical Education, Recreation & Dance*. 2015;86(6):50-4.
190. Morgan PJ, Collins CE, Plotnikoff RC, McElduff P, Burrows T, Warren JM, et al. The SHED-IT community trial study protocol: a randomised controlled trial of weight loss programs for overweight and obese men. *BMC Public Health*. 2010;10(1):701.
191. Herschman J, Kasenberg T, Levy D, Ruth N, Taberner C, Kaufman M, Regina A. Development of a smartphone app for adolescents with lupus: a collaborative meeting-based methodology inclusive of a wide range of stakeholders. *Revista Panamericana de Salud Pública*. 2014;35:471-6.

192. Liao Y, Intille SS, Dunton GF. Using ecological momentary assessment to understand where and with whom adults' physical and sedentary activity occur. *International journal of behavioral medicine*. 2015 Feb 1;22(1):51-61.
193. Liu W, Nichols RA, Zillifro TD. Comparison and comparability: fitness tracking between youths with different physical activity levels. *Measurement in Physical Education and Exercise Science*. 2013 Oct 1;17(4):295-309.
194. Simons D, De Bourdeaudhuij I, Clarys P, De Cocker K, Vandelanotte C, Deforche B. A smartphone app to promote an active lifestyle in lower-educated working young adults: development, usability, acceptability, and feasibility study. *JMIR mHealth and uHealth*. 2018;6(2):e44.
195. Washington WD, Banna KM, Gibson AL. Preliminary efficacy of prize-based contingency management to increase activity levels in healthy adults. *Journal of Applied Behavior Analysis*. 2014 Jun 1;47(2):231-45.
196. Valbuena D, Miltenberger R, Solley E. Evaluating an Internet-based program and a behavioral coach for increasing physical activity. *Behavior Analysis: Research and Practice*. 2015 May;15(2):122.
197. Losina E, Smith SR, Usiskin IM, Klara KM, Michl GL, Deshpande BR, Yang HY, Smith KC, Collins JE, Katz JN. Implementation of a workplace intervention using financial rewards to promote adherence to physical activity guidelines: a feasibility study. *BMC public health*. 2017 Dec;17(1):921.
198. Kurti AN, Dallery J. Internet-based contingency management increases walking in sedentary adults. *Journal of applied behavior analysis*. 2013 Sep;46(3):568-81.
199. Gaudet J, Gallant F, Bélanger M. A bit of fit: minimalist intervention in adolescents based on a physical activity tracker. *JMIR mHealth and uHealth*. 2017;5(7):e92.
200. Pendergast FJ, Ridgers ND, Worsley A, McNaughton SA. Evaluation of a smartphone food diary application using objectively measured energy expenditure. *International Journal of Behavioral Nutrition and Physical Activity*. 2017 Dec;14(1):30.
201. Pirolli P, Mohan S, Venkatakrishnan A, Nelson L, Silva M, Springer A. Implementation intention and reminder effects on behavior change in a mobile health system: a predictive cognitive model. *Journal of medical Internet research*. 2017;19(11):e397.
202. Castro Sweet CM, Chiguluri V, Gumpina R, Abbott P, Madero EN, Payne M, Happe L, Matanich R, Renda A, Prewitt T. Outcomes of a digital health program with human coaching for diabetes risk reduction in a Medicare population. *Journal of aging and health*. 2018 Jun;30(5):692-710.
203. Chung AE, Skinner AC, Hasty SE, Perrin EM. Tweeting to health: a novel mHealth intervention using Fitbits and Twitter to foster healthy lifestyles. *Clinical pediatrics*. 2017 Jan;56(1):26-32.
204. Willey S, Walsh JK. Outcomes of a mobile health coaching platform: 12-week results of a single-arm longitudinal study. *JMIR mHealth and uHealth*. 2016;4(1):e3.
205. Kerner C, Goodyear VA. The motivational impact of wearable healthy lifestyle technologies: a self-determination perspective on Fitbits with adolescents. *American Journal of Health Education*. 2017 Sep 3;48(5):287-97.
206. Turner-McGrievy GM, Beets MW, Moore JB, Kaczynski AT, Barr-Anderson DJ, Tate DF. Comparison of traditional versus mobile app self-monitoring of physical activity and dietary intake among overweight adults participating in an mHealth weight loss program. *Journal of the American Medical Informatics Association*. 2013 Feb 21;20(3):513-8.
207. Schragger JD, Shayne P, Wolf S, Das S, Patzer RE, White M, Heron S. Assessing the influence of a Fitbit physical activity monitor on the exercise practices of emergency medicine residents: a pilot study. *JMIR mHealth and uHealth*. 2017;5(1):e2.
208. Guitart NA, MacDougall A, Connelly DM, Knight E. Fitbit activity trackers interrupt workplace sedentary behavior: A new application. *Workplace health & safety*. 2018 May;66(5):218-22.
209. Thomas JG, Bond DS. Behavioral response to a just-in-time adaptive intervention (JITAI) to reduce sedentary behavior in obese adults: Implications for JITAI optimization. *Health Psychology*. 2015 Dec;34(S):1261.
210. Nkonde-Price C, Shea J, Rosin R, Merchant R. A Theory Based Pedometer App Intervention to Promote Physical Activity Among African American Women: The ChangeMySteps Project. *Circulation*. 2015 Nov 10;132(suppl\_3):A16294-.

**Supplement 9: eTable 2. Kappa score for pairs of investigators in title and abstract screening and full-text screening**

| <b>Cohen's kappa</b>       | <b>Title and abstract screening</b> | <b>Full-text screening</b> |
|----------------------------|-------------------------------------|----------------------------|
| Group 1                    | 0.56 (n=5548)                       | 0.89 (n=113)               |
| Group 2                    | 0.59 (n=1000)                       | 0.82 (n=27)                |
| Group 3                    | 0.53 (n=1000)                       | 0.73 (n=19)                |
| Group 4                    | 0.45 (n=1000)                       | 0.51 (n=22)                |
| Group 5                    | 0.57 (n=1000)                       | 0.5 (n=20)                 |
| Group 6                    | 0.62 (n=1000)                       | -                          |
| <b>Average kappa score</b> | 0.57                                | 0.78                       |



**Supplement 10: eTable 3. Characteristics of studies not included in the meta-analysis**

| First author, year, country <sup>a</sup> | Self-monitoring mHealth <sup>a</sup>      | Participants                                     | N (I;C) <sup>b</sup> ; N women | Study duration | Study arms description                                                                                                                          | Reason for exclusion from meta-analysis               |
|------------------------------------------|-------------------------------------------|--------------------------------------------------|--------------------------------|----------------|-------------------------------------------------------------------------------------------------------------------------------------------------|-------------------------------------------------------|
| Kitagawa, 2019, Japan                    | Jawbone UP (tracker+app)                  | Women, 20-50y                                    | 3-arm N 48 (16;16); 48         | 2 weeks        | I: Tracker + app + tailored session; C: educational leaflet                                                                                     | Not enough data to calculate effect size <sup>c</sup> |
| Simons, 2018, Belgium                    | Tracker + app (Fitbit + Active Coach app) | Inactive; 18-30y; lower education                | 130 (60;70); 67                | 9 weeks        | I: Fitbit tracker + Active Coach app; C: educational leaflet                                                                                    | Not enough data to calculate effect size <sup>d</sup> |
| Finkelstein, 2015, US                    | Tracker + app (Fitbit One)                | Women; sedentary; BMI≥30                         | 30                             | 2 M            | I: Fitbit + inactivity reminders (4 weeks); C: Fitbit alone (4 weeks)                                                                           | Crossover design                                      |
| Harries, 2016, UK                        | App (bActive)                             | Male adults                                      | 110 (55;55); 0 [3-arm N 165]   | 1.5 M          | I: App + social and individual feedback; C: Blinded app                                                                                         | Not enough data to calculate effect size <sup>e</sup> |
| Rabbi, 2015, US                          | App (MyBehaviour)                         | 18-60y                                           | 18 (9;8); 8                    | 3 weeks        | I: App with personalisation; C: App without personalisation                                                                                     | Not enough data to calculate effect size <sup>f</sup> |
| Koyle, 2013, US                          | App (Adidas miCoach)                      | Women; inactive <sup>c</sup> ; 35-64y; employees | 73 (36; 37); 73                | 1.5 M          | I: App + SMS (tailored to promote self-efficacy) + walking plan + educational leaflets; C: App + walking plan + educational leaflets            | Not enough data to calculate effect size <sup>g</sup> |
| Thompson, 2012, US                       | Tracker ("Gruve"; MUVE, Inc)              | Physicians                                       | 20 (10;10); 3                  | 8 M            | Crossover trial; A: exercise counseling + accelerometer feedback + treadmill desk (12 weeks); B: accelerometer-only without feedback (12 weeks) | Crossover design                                      |

<sup>a</sup>Grouped by type of technology (tracker + app, app-only, tracker-only), from most to least recent year of publication (based on information provided by the authors and commercially available information for each tracker; interventions involving Fitbit, Jawbone and Polar M400 were considered to include tracker + application components even if the application was not mentioned by the authors, given their availability for download by participants from any app store for the setup of the tracker); <sup>b</sup> In studies with more than 2 arms, the intervention of interest and control groups were selected as per defined in the methods; <sup>c</sup> Author could not provide the p-value or confidence interval (CI) for the difference in the average daily number of steps after the intervention between control

and tailored feedback groups; <sup>d</sup>Author did not reply to our request to provide p-value (or CI) for the difference in steps post-intervention (9 weeks) between the 2 groups; <sup>e</sup>Author did not reply to our request to provide the average daily step count for the social + individual feedback group and for the control group at the end of the 6-week study (with CI or p-value); <sup>f</sup>Author did not reply to our request to provide the average daily walking minutes for the intervention and for the control groups at the end of the 3-week study (with CI or p-value); <sup>g</sup>Unable to contact author to provide p-value or CI for the difference in means. Abbreviations: App: smartphone application; C: control; I: intervention; M: months; SMS, Short Message Service; UK: United Kingdom; US: United States of America; y: years.

**Supplement 11. eTable 4. Studies not included in the meta-analysis: Components and behaviour change techniques of intervention and control groups, as well as theories, incentives, and study retention rates**

| Author, year, country | Characteristics and BCTs of the intervention                                                                                                                                                                                                                                                                                                 |                                                                                                                                                                                                                                                                                                                                                     | Characteristics and BCTs of the control                                                                                                                                                                                                                                   | Theories and models of behaviour change mentioned                         | Incentives to assessment compliance and study completion | Retention rates Intervention; Control N (%) |
|-----------------------|----------------------------------------------------------------------------------------------------------------------------------------------------------------------------------------------------------------------------------------------------------------------------------------------------------------------------------------------|-----------------------------------------------------------------------------------------------------------------------------------------------------------------------------------------------------------------------------------------------------------------------------------------------------------------------------------------------------|---------------------------------------------------------------------------------------------------------------------------------------------------------------------------------------------------------------------------------------------------------------------------|---------------------------------------------------------------------------|----------------------------------------------------------|---------------------------------------------|
|                       | “Smart” mHealth technology                                                                                                                                                                                                                                                                                                                   | Other components of the intervention                                                                                                                                                                                                                                                                                                                |                                                                                                                                                                                                                                                                           |                                                                           |                                                          |                                             |
| Kitagawa, 2019, Japan | <b>Tracker + app (Jawbone UP)</b><br>2.2 Feedback on behaviour<br>2.3 Self-monitoring of behaviour<br>--<br>[2.2, 2.3 The application displayed the number of steps, total physical activity time, longest activity time, longest prolonged sitting time, calorie consumption (total, active, inactive), and activity amount per time zone.] | <b>Tailored face-to-face session + educational leaflet</b><br>2.2 Feedback on behaviour<br>4.1 Instruction on how to perform the behaviour<br>5.1 Information about health consequences<br>--<br>[2.2, 4.1 advised the participants on effective methods for shortening sitting time specific to each participant's lifestyle; 5.1 same as control] | <b>Educational leaflet</b><br>5.1 Information about health consequences<br>--<br>[5.1 “pamphlet used graphs and pictures to show that long periods of sitting lead to mortality and lifestyle diseases, including diabetes, obesity, cardiovascular disease, and cancer”] | NR                                                                        | NR                                                       | I: 16/16 (100);<br>C: 16/16 (100)           |
| Simons, 2018, Belgium | <b>Fitbit + Active Coach app</b><br>1.1 Goal setting (behaviour)<br>1.2 Problem solving<br>1.5 Review behaviour goal<br>1.6 Discrepancy between current behaviour and goal<br>2.2 Feedback on behaviour<br>2.3 Self-monitoring of behaviour<br>4.1 Instruction on how to perform the behaviour<br>7.1 Prompts/cues                           | <b>None</b>                                                                                                                                                                                                                                                                                                                                         | <b>Educational leaflet</b><br>4.1 Instruction on how to perform the behaviour<br>--<br>[4.1 “tips about a physically active lifestyle”]                                                                                                                                   | Attitude-social influence-self-efficacy model; Behavior Change Techniques | NR                                                       | I: 55/60 (92);<br>C: 63/70 (90)             |

| Author, year, country | Characteristics and BCTs of the intervention                                                                                                                                                                                                                                                                                                                                                                                                                                                                                                                                                      |                                                                                                                                                                                 | Characteristics and BCTs of the control                                                                                                                                     | Theories and models of behaviour change mentioned | Incentives to assessment compliance and study completion | Retention rates Intervention; Control N (%)         |
|-----------------------|---------------------------------------------------------------------------------------------------------------------------------------------------------------------------------------------------------------------------------------------------------------------------------------------------------------------------------------------------------------------------------------------------------------------------------------------------------------------------------------------------------------------------------------------------------------------------------------------------|---------------------------------------------------------------------------------------------------------------------------------------------------------------------------------|-----------------------------------------------------------------------------------------------------------------------------------------------------------------------------|---------------------------------------------------|----------------------------------------------------------|-----------------------------------------------------|
|                       | "Smart" mHealth technology                                                                                                                                                                                                                                                                                                                                                                                                                                                                                                                                                                        | Other components of the intervention                                                                                                                                            |                                                                                                                                                                             |                                                   |                                                          |                                                     |
|                       | 8.7 Graded tasks<br>--<br>[1.1, 8.7 "a personal goal dependent on the baseline level of the chosen behaviour (overall physical activity or active transport) was set by the app for the following week"; 1.2 "users were asked why they did not achieve their goal to determine their perceived barriers"; 1.5 "If they achieved their goal, they could increase it or maintain the same goal for the next week"; 1.6, 7.1 "Every day during the following 8 weeks, users received a notification on whether or not they had achieved their daily goal"; 4.1 "notification with a practical tip"] |                                                                                                                                                                                 |                                                                                                                                                                             |                                                   |                                                          |                                                     |
| Finkelstein, 2015, US | <b>Fitbit</b><br>2.3. Self-monitoring of behaviour<br>--<br>2.3 "For inactivity monitoring we employed a physical activity tracking device (Fitbit)"                                                                                                                                                                                                                                                                                                                                                                                                                                              | <b>Android smartphone with digital data plan</b><br>2.2. Feedback on behaviour<br>3. Social support<br>7.1. Prompts/cues<br>--<br>[2.2. "allowed to see all the measurements of | <b>In "control" periods, participants are under the same conditions, but do not receive the messages</b><br>2.3. Self-monitoring of behaviour<br>2.2. Feedback on behaviour | -                                                 | NR                                                       | 27/30 (total; retention rates per arm not reported) |

| Author, year, country | Characteristics and BCTs of the intervention                                                                                                                                                                                                             |                                                                                                                                                                                                                                                                                                                                                                                                              | Characteristics and BCTs of the control                                                                                  | Theories and models of behaviour change mentioned | Incentives to assessment compliance and study completion                 | Retention rates Intervention; Control N (%) |
|-----------------------|----------------------------------------------------------------------------------------------------------------------------------------------------------------------------------------------------------------------------------------------------------|--------------------------------------------------------------------------------------------------------------------------------------------------------------------------------------------------------------------------------------------------------------------------------------------------------------------------------------------------------------------------------------------------------------|--------------------------------------------------------------------------------------------------------------------------|---------------------------------------------------|--------------------------------------------------------------------------|---------------------------------------------|
|                       | “Smart” mHealth technology                                                                                                                                                                                                                               | Other components of the intervention                                                                                                                                                                                                                                                                                                                                                                         |                                                                                                                          |                                                   |                                                                          |                                             |
|                       |                                                                                                                                                                                                                                                          | activity that are routinely captured and displayed by the commercial Fitbit website”; 3. “Text tailored motivational message”; 7.1 “checks to see if there have been less than 15 steps in the past hour (...) [and] it will send a tailored text message to the user’s phone informing that sedentary period exceeded healthy limits, and encourages the user to take a break from the sedentary position”] |                                                                                                                          |                                                   |                                                                          |                                             |
| Harries, 2016, UK     | bActive app<br>2.2 Feedback on behaviour<br>2.3 Self-monitoring of behaviour<br>6.2. Social comparison<br><br>2.2 “feedback on the participant’s own steps”; 2.3 (app measures activity continually); 6.2 “average steps taken by others in their group” | Automated emails + weekly SMS<br>1.1 Goal setting (behaviour)<br>7.1 Prompts/cues<br><br>1.1 “self-generated, informal targets”; 7.1 “weekly messages to encourage them to walk more”                                                                                                                                                                                                                        | Disabled bActive app (no data; monitoring purposes-only) + SMS every 2 weeks to remind participants to carry their phone | NR                                                | Mobile phone provided at beginning of the study could be kept at the end | I: 50/55 (91);<br>C: 49/55 (89)             |
| Rabbi, 2015, US       | <b>MyBehaviour app</b><br>2.2 Feedback on behaviour                                                                                                                                                                                                      | None                                                                                                                                                                                                                                                                                                                                                                                                         | <b>MyBehaviour app</b><br>2.2 Feedback on behaviour                                                                      | Learning theory, social                           | NR                                                                       | I: 9/9 (100);<br>C: 8/8 (100)               |

| Author,<br>year,<br>country | Characteristics and BCTs of the intervention                                                                                                                                                                                                                                                                                                                                                                                                                                                                                                                                                                                                                                                                                                                                                                                                                       |                                         | Characteristics and BCTs<br>of the control                                                                                                                                                                       | Theories<br>and models<br>of behaviour<br>change<br>mentioned | Incentives to<br>assessment<br>compliance and<br>study<br>completion | Retention<br>rates<br>Intervention;<br>Control<br>N (%) |
|-----------------------------|--------------------------------------------------------------------------------------------------------------------------------------------------------------------------------------------------------------------------------------------------------------------------------------------------------------------------------------------------------------------------------------------------------------------------------------------------------------------------------------------------------------------------------------------------------------------------------------------------------------------------------------------------------------------------------------------------------------------------------------------------------------------------------------------------------------------------------------------------------------------|-----------------------------------------|------------------------------------------------------------------------------------------------------------------------------------------------------------------------------------------------------------------|---------------------------------------------------------------|----------------------------------------------------------------------|---------------------------------------------------------|
|                             | “Smart” mHealth<br>technology                                                                                                                                                                                                                                                                                                                                                                                                                                                                                                                                                                                                                                                                                                                                                                                                                                      | Other components of the<br>intervention |                                                                                                                                                                                                                  |                                                               |                                                                      |                                                         |
|                             | 2.3 Self-monitoring of<br>behaviour<br>4.1 Instruction on how to<br>perform the behaviour<br>7.1 Prompts/cues<br>8.1 Behavioural<br>practice/rehearsal<br>8.3 Habit formation<br>--<br>[2.2 Figure 4 “Nearly 7 hours<br>sedentary everyday”; 2.3<br>“MyBehavior uses the<br>accelerometer and the Global<br>Positioning<br>System (GPS) sensor inside<br>the mobile phone to<br>continuously keep track of an<br>individual’s physical<br>activities”; 4.1 “personalised<br>context-sensitive<br>suggestions”, “suggestions<br>that encourage the user to<br>either continue positive<br>activities (ie, walking, or<br>exercise), make small<br>changes in some situations<br>(ie, stationary activities)”; 7.1<br>“MyBehavior suggests (ie,<br>cues or triggers) a frequent<br>behaviour”; 8.1, 8.3<br>“MyBehavior suggests (ie,<br>cues or triggers) a frequent |                                         | 2.3 Self-monitoring of<br>behaviour<br>4.1 Instruction on how to<br>perform the behaviour<br>7.1 Prompts/cues<br>--<br>[2.2, 2.3, 7.1 Same as<br>intervention; 4.1 “generic<br>prescriptive<br>recommendations”] | cognitive<br>theory, the<br>Fogg<br>Behavior<br>Model         |                                                                      |                                                         |

| Author, year, country | Characteristics and BCTs of the intervention                                                                                                                                                           |                                                                                                                                                                                                                                                                                                                                                                                                                                                                                                                                         | Characteristics and BCTs of the control                                                                                                                                                                                                                                                                                                                                                                                                                                                                            | Theories and models of behaviour change mentioned | Incentives to assessment compliance and study completion                                                                                                                              | Retention rates Intervention; Control N (%) |
|-----------------------|--------------------------------------------------------------------------------------------------------------------------------------------------------------------------------------------------------|-----------------------------------------------------------------------------------------------------------------------------------------------------------------------------------------------------------------------------------------------------------------------------------------------------------------------------------------------------------------------------------------------------------------------------------------------------------------------------------------------------------------------------------------|--------------------------------------------------------------------------------------------------------------------------------------------------------------------------------------------------------------------------------------------------------------------------------------------------------------------------------------------------------------------------------------------------------------------------------------------------------------------------------------------------------------------|---------------------------------------------------|---------------------------------------------------------------------------------------------------------------------------------------------------------------------------------------|---------------------------------------------|
|                       | “Smart” mHealth technology                                                                                                                                                                             | Other components of the intervention                                                                                                                                                                                                                                                                                                                                                                                                                                                                                                    |                                                                                                                                                                                                                                                                                                                                                                                                                                                                                                                    |                                                   |                                                                                                                                                                                       |                                             |
|                       | behaviour (eg, a particular walk) that the person often does in a particular life context. This small, low-effort change simply increases the frequency of a behaviour that the person already does.”] |                                                                                                                                                                                                                                                                                                                                                                                                                                                                                                                                         |                                                                                                                                                                                                                                                                                                                                                                                                                                                                                                                    |                                                   |                                                                                                                                                                                       |                                             |
| Koyle, 2013, US       | <b>App (Adidas miCoach)</b><br>2.2 Feedback on behaviour<br>2.3 Self-monitoring of behaviour<br>--<br>[2.2, 2.3 Same as control]                                                                       | <b>Weekly SMS + walking plan + education</b><br>1.1 Goal setting (behaviour)<br>2.2 Feedback on behaviour<br>4.1 Instruction on how to perform the behaviour<br>15.1 Verbal persuasion about capability<br>--<br>[1.1 Same as control; 2.2 text messages: “your overall pacing is steadily increasing”; 15.1 “The messages were individually tailored based upon the participant’s walking logs for the previous week(s). An example of a message is, “Holly, your overall pacing is steadily increasing,” and “Stacey, great pacing on | <b>App (Adidas miCoach) + walking plan + education</b><br>1.1 Goal setting (behaviour)<br>2.2 Feedback on behaviour<br>2.3 Self-monitoring of behaviour<br>4.1 Instruction on how to perform the behaviour<br>--<br>[1.1 “aiming for at least 30 minutes walking per day”; 2.2, 2.3 “Walking distance and duration logs. These logs were collected by the smartphone exercise app (using the accelerometer feature of the smartphone) each time a walking for exercise activity was initiated.”; 4.1 walking plan] | Social Cognitive Theory (Self-efficacy)           | Those who completed the study had their names added to a drawing for one of five \$50 gift-cards of their choice as well as all receiving a pair of athletic-style elastic shoelaces. | I: 30/36 (83);<br>C: 33/37 (89)             |

| Author, year, country | Characteristics and BCTs of the intervention                                                                                                                            |                                                                                                                                                                                                                                                                                    | Characteristics and BCTs of the control                             | Theories and models of behaviour change mentioned | Incentives to assessment compliance and study completion | Retention rates Intervention; Control N (%) |
|-----------------------|-------------------------------------------------------------------------------------------------------------------------------------------------------------------------|------------------------------------------------------------------------------------------------------------------------------------------------------------------------------------------------------------------------------------------------------------------------------------|---------------------------------------------------------------------|---------------------------------------------------|----------------------------------------------------------|---------------------------------------------|
|                       | “Smart” mHealth technology                                                                                                                                              | Other components of the intervention                                                                                                                                                                                                                                               |                                                                     |                                                   |                                                          |                                             |
|                       |                                                                                                                                                                         | your walk.”]                                                                                                                                                                                                                                                                       |                                                                     |                                                   |                                                          |                                             |
| Thompson, 2012, US    | <b>Tracker (Gruve)</b><br>2.2 Feedback on behaviour<br>2.3 Self-monitoring of behaviour<br>--<br>[2.2. 2.3 “Feedback about activity was provided by the accelerometer”] | <b>20-min weekly exercise counselling session</b> + treadmill desk + website<br>4.1. Instruction on how to perform behaviour<br>12.5 Adding objects to the environment<br>--<br>[4.1 “20 minute weekly counseling sessions on how to increase physical activity”; 12.5 treadmill”] | <b>Tracker without feedback</b><br>2.3 Self-monitoring of behaviour | NR                                                | NR                                                       | I: 8/10; C: 9/10                            |

Abbreviations: App: smartphone application; BCT: behaviour change techniques; C: control; I: intervention; NR: not reported; SMS, Short Message Service; UK: United Kingdom; US: United States of America.



**Supplement 12: eTable 5. Risk of bias of studies not included in the meta-analysis**

| Author, year, country | Random sequence allocation <sup>a</sup> | Allocation concealment | Blinding of participants and personnel | Blinding of outcome assessment | Incomplete outcome data | Selective reporting <sup>b</sup> |
|-----------------------|-----------------------------------------|------------------------|----------------------------------------|--------------------------------|-------------------------|----------------------------------|
| Kitagawa, 2019, Japan | High                                    | Unclear                | High                                   | Low                            | Low                     | Unclear                          |
| Simons, 2018, Belgium | Unclear                                 | Unclear                | High                                   | Low                            | Low                     | High                             |
| Finkelstein, 2015, US | Unclear                                 | Unclear                | High                                   | Low                            | Unclear                 | Unclear                          |
| Harries, 2016, UK     | High                                    | Unclear                | Unclear                                | Low                            | Low                     | Unclear                          |
| Rabbi, 2015, US       | Unclear                                 | Unclear                | High                                   | Low                            | Low                     | Low                              |
| Koyle, 2013, US       | Low                                     | Unclear                | High                                   | Unclear                        | Unclear                 | Unclear                          |
| Thompson, 2012, US    | Unclear                                 | Unclear                | High                                   | Low                            | High                    | Unclear                          |

Legend: Low risk of bias; High risk of bias; Unclear risk of bias. <sup>a</sup>High: no random component or, in the case of trials with small sample sizes (N<50 per arm), when there are clear imbalances in baseline characteristics between groups; <sup>b</sup>Unclear: when a registered protocol was not found; High: in multiple-arm trials when the authors did not pre-specify which arm was considered superior and which was considered the "control". Abbreviations: UK: United Kingdom; US: United States of America.

**Supplement 13: eTable 6. Risk of bias of studies included in the meta-analysis**

| Author, year       | Random sequence allocation <sup>a</sup> | Allocation concealment | Blinding of participants and personnel | Blinding of outcome assessment <sup>b</sup> | Incomplete outcome data | Selective reporting <sup>c</sup> |
|--------------------|-----------------------------------------|------------------------|----------------------------------------|---------------------------------------------|-------------------------|----------------------------------|
| Wyke, 2019         | Low                                     | Low                    | High                                   | Low                                         | Low                     | Low                              |
| Donoghue, 2018     | Unclear                                 | Unclear                | High                                   | High                                        | Low                     | Low                              |
| Pope, 2018         | Low                                     | Unclear                | High                                   | Low                                         | Low                     | Low                              |
| Vandelanotte, 2018 | Low                                     | Unclear                | High                                   | High                                        | High                    | Low                              |
| Ashton, 2017       | Low                                     | Low                    | High                                   | Low                                         | Low                     | Low                              |
| Brakenridge, 2016  | Low                                     | Unclear                | High                                   | Low                                         | Low                     | Low                              |
| Finkelstein, 2016  | Low                                     | Low                    | High                                   | Low                                         | Low                     | Low                              |
| Poirier, 2016      | Low                                     | Unclear                | High                                   | Low                                         | Low                     | Low                              |
| Ashe, 2015         | High                                    | Low                    | High                                   | Low                                         | High                    | Low                              |
| Cadmus, 2015       | Low                                     | Unclear                | High                                   | Low                                         | Low                     | Unclear                          |
| Martin S, 2015     | High                                    | Low                    | High                                   | Low                                         | Low                     | Low                              |
| Thorndike, 2014    | Low                                     | High                   | High                                   | Low                                         | Low                     | Low                              |
| Patel, 2019        | Low                                     | Unclear                | High                                   | Low                                         | Low                     | Low                              |
| Ellingson, 2019    | Unclear                                 | Unclear                | High                                   | Low                                         | Unclear                 | Unclear                          |
| Zhang, 2019        | Low                                     | Unclear                | Low                                    | Low                                         | Low                     | Low                              |
| Patel, 2018        | Low                                     | Unclear                | High                                   | Low                                         | Low                     | Low                              |
| Robinson, 2018     | High                                    | Unclear                | Low                                    | Low                                         | Low                     | Unclear                          |
| Fanning, 2017      | High                                    | Unclear                | High                                   | Low                                         | Low                     | Low                              |
| Patel, 2017        | Low                                     | Low                    | High                                   | Low                                         | Low                     | Low                              |
| John, 2016         | Unclear                                 | Unclear                | Unclear                                | Low                                         | Low                     | Unclear                          |
| King, 2016         | Low                                     | Low                    | High                                   | Low                                         | Low                     | High                             |

| Author, year   | Random sequence allocation <sup>a</sup> | Allocation concealment | Blinding of participants and personnel | Blinding of outcome assessment <sup>b</sup> | Incomplete outcome data | Selective reporting <sup>c</sup> |
|----------------|-----------------------------------------|------------------------|----------------------------------------|---------------------------------------------|-------------------------|----------------------------------|
| Melton, 2016   | Low                                     | Unclear                | High                                   | Low                                         | Low                     | Unclear                          |
| Patel, 2016 I  | Low                                     | Unclear                | High                                   | Low                                         | Low                     | Low                              |
| Patel, 2016 II | Low                                     | Unclear                | High                                   | Low                                         | Low                     | Low                              |
| Walsh, 2016    | High                                    | Unclear                | High                                   | Low                                         | Low                     | Unclear                          |
| Cowdery, 2015  | Low                                     | Unclear                | High                                   | High                                        | Low                     | Unclear                          |
| Wang, 2015     | Low                                     | Low                    | High                                   | Low                                         | Low                     | Low                              |
| Glynn, 2014    | Low                                     | Low                    | High                                   | Low                                         | Low                     | Low                              |

Legend: Low risk of bias; High risk of bias; Unclear risk of bias <sup>a</sup>High: no random component or, in the case of trials with small sample sizes (N<50 per arm), when there were clear imbalances in baseline characteristics between groups; <sup>b</sup>Outcome-related domains were assessed considering the outcomes mentioned in Table 1; <sup>c</sup>Unclear: when a registered protocol was not found; High: in multiple-arm trials when the authors did not pre-specify which arm was considered superior and which was considered the "control".

**Supplement 14: eTable 7. Conflict of interests, funding sources, and adherence to reporting guidelines in included studies**

| Author, year       | Conflict of interest declaration                                                                                                                                                                                                                                                                                                                                                                  | Funding                                                                                                                                                                                                                                                                                                                                                                                                                                                                                                                                                      | Adherence to reporting guidelines |
|--------------------|---------------------------------------------------------------------------------------------------------------------------------------------------------------------------------------------------------------------------------------------------------------------------------------------------------------------------------------------------------------------------------------------------|--------------------------------------------------------------------------------------------------------------------------------------------------------------------------------------------------------------------------------------------------------------------------------------------------------------------------------------------------------------------------------------------------------------------------------------------------------------------------------------------------------------------------------------------------------------|-----------------------------------|
| Wyke, 2019         | AM is a paid statistical advisor for PLOS Medicine. AM's institution received funding from the European Union FP7 funding programme, covering salaries of staff within the Robertson Centre for Biostatistics who provided statistical and data management support to the study. DJM and DWL work for PAL Technologies Ltd., a manufacturer of the activPAL and SitFIT, and a partner in EuroFIT. | This project has received funding from the European Union's Seventh Framework Program for research, technological development, and demonstration under grant agreement number 602170. The Health Services Research Unit, University of Aberdeen, receives core funding from the Chief Scientist Office of the Scottish Government Health Directorates.                                                                                                                                                                                                       | NR                                |
| Donoghue, 2018     | The authors have no professional relationships with companies or manufacturers who will benefit from the results of the present study.                                                                                                                                                                                                                                                            | This project was funded by an in-house New York Institute of Technology College of Osteopathic Medicine grant.                                                                                                                                                                                                                                                                                                                                                                                                                                               | NR                                |
| Pope, 2018         | NR                                                                                                                                                                                                                                                                                                                                                                                                | NR                                                                                                                                                                                                                                                                                                                                                                                                                                                                                                                                                           | CONSORT                           |
| Vandelanotte, 2018 | None declared.                                                                                                                                                                                                                                                                                                                                                                                    | The study was funded through a Central Queensland University infrastructure grant and through support funds as part of a National Heart Foundation of Australia Future Leader Fellowship (ID 100427). CV (ID 100427), MJD (ID 100029), and SS (ID 101240) were supported by National Heart Foundation of Australia Fellowships. CAM (ID 1125913), ALR (ID 1105926), SS (ID GNT1125586), and CES (ID 1090517) were supported by National Health and Medical Research Council Fellowships. Study and fellowship funders had no role in any part of this study. | CONSORT-EHEALTH                   |
| Ashton, 2017       | The authors declare that they have no competing interests.                                                                                                                                                                                                                                                                                                                                        | The research was funded by a project grant from the Hunter Medical Research Institute (HMRI) (14–30). HMRI did not have any influence on the performance of the trial, analysis of the data, writing, or the publication of the results. CEC is supported by an NHMRC Senior Research Fellowship.                                                                                                                                                                                                                                                            | CONSORT                           |
| Brakenridge, 2016  | None declared.                                                                                                                                                                                                                                                                                                                                                                                    | This work is supported by a Vanguard Grant (Award ID: 100216) from the National Heart                                                                                                                                                                                                                                                                                                                                                                                                                                                                        | CONSORT                           |

| Author, year      | Conflict of interest declaration                                                                                                                                                                                                                                                                                                                 | Funding                                                                                                                                                                                                                                                                                                                                                                                                                                                                                                                                                                                                                                                                                                                                                                                                      | Adherence to reporting guidelines |
|-------------------|--------------------------------------------------------------------------------------------------------------------------------------------------------------------------------------------------------------------------------------------------------------------------------------------------------------------------------------------------|--------------------------------------------------------------------------------------------------------------------------------------------------------------------------------------------------------------------------------------------------------------------------------------------------------------------------------------------------------------------------------------------------------------------------------------------------------------------------------------------------------------------------------------------------------------------------------------------------------------------------------------------------------------------------------------------------------------------------------------------------------------------------------------------------------------|-----------------------------------|
|                   |                                                                                                                                                                                                                                                                                                                                                  | Foundation of Australia. The authors would also like to acknowledge Lendlease for providing additional support for this work and for the Office Ergonomics Research Committee (OERC) for providing funding to conduct the 12-month follow-up. The National Health and Medical Research Council (NHMRC) of Australia through a Centre of Research Excellence Grant (#1057608) to GNH and DWD, provides salary support to EAHW, and a top up scholarship to CLB. CLB is also supported by an Australian Postgraduate Award. DWD is supported by an NHMRC Senior Research Fellowship (#1078360). LMS is supported by an NHMRC Australia Senior Research Fellowship (#1019980). GNH is supported by a Heart Foundation Postdoctoral Fellowship (#PH 12B 7054) and NHMRC Career Development Fellowship (#108029). |                                   |
| Finkelstein, 2016 | We declare no competing interests.                                                                                                                                                                                                                                                                                                               | This study was supported by a Health Services Research Competitive Research Grant (HSRG/0022/2012) from the Ministry of Health, Singapore. The funder of the study had no role in study design, data collection, data analysis, data interpretation, or writing of the report. The corresponding author had full access to all the data in the study and had final responsibility for the decision to submit for publication.                                                                                                                                                                                                                                                                                                                                                                                | NR                                |
| Poirier, 2016     | JP and NC are full-time employees of MeYou Health and own stock in Healthways Inc, the parent company of MeYou Health. WB, ML, GJ, H-CY, JC, and NS are faculty or employees of the Johns Hopkins University and were paid through an institutional consulting agreement with Healthways for work in designing the study and analyzing the data. | We thank Human Resources at Healthways and the MeYou Health Walkadoo team. The work was fully funded by MeYou Health LLC.                                                                                                                                                                                                                                                                                                                                                                                                                                                                                                                                                                                                                                                                                    | NR                                |
| Ashe, 2015        | The authors declare that they have no competing interests.                                                                                                                                                                                                                                                                                       | We also acknowledge Canadian Institutes of Health Research (CIHR) for operation funds for this                                                                                                                                                                                                                                                                                                                                                                                                                                                                                                                                                                                                                                                                                                               | NR                                |

| Author, year         | Conflict of interest declaration                                                                                                                                                                                                                                                                                             | Funding                                                                                                                                                                                                                                                                                                                                                                                                                                                                                                                                                                                                                                                                                                                                                                                                     | Adherence to reporting guidelines |
|----------------------|------------------------------------------------------------------------------------------------------------------------------------------------------------------------------------------------------------------------------------------------------------------------------------------------------------------------------|-------------------------------------------------------------------------------------------------------------------------------------------------------------------------------------------------------------------------------------------------------------------------------------------------------------------------------------------------------------------------------------------------------------------------------------------------------------------------------------------------------------------------------------------------------------------------------------------------------------------------------------------------------------------------------------------------------------------------------------------------------------------------------------------------------------|-----------------------------------|
|                      |                                                                                                                                                                                                                                                                                                                              | project (funding reference number AAM-108607). We acknowledge career award support for Dr. Ashe and Dr. Sims-Gould from CIHR (New Investigator Award) and the Michael Smith Foundation for Health Research (MSFHR) Scholar Award. Dr. Hoppmann is supported by career awards from MSFHR and the Canada Research Chairs Program. Dr. Gardiner is supported by an Australian National Health and Medical Research Council Centre of Research Excellence (Grant No. 1000986). Dr. Giangregorio is the recipient of a CIHR New Investigator Award and an Early Researcher Award from the Ontario Ministry of Research and Innovation. The sponsor had no role in the study design; collection, analysis, and interpretation of data; writing the report; and the decision to submit the report for publication. |                                   |
| Cadmus-Bertram, 2015 | The authors have no conflicts of interest to report.                                                                                                                                                                                                                                                                         | This study was funded by NIH (1R03CA168450) and recruitment supported by the Athena Breast Health Network. This research was supported by the National Cancer Institute (1R03CA168450).                                                                                                                                                                                                                                                                                                                                                                                                                                                                                                                                                                                                                     | NR                                |
| Martin, 2015         | Digital physical activity tracking devices were provided in kind by Fitbug, a private for-profit company. This trial was investigator initiated and Fitbug did not provide cash payments for the research or writing of the manuscript. Fitbug did not participate in the analysis of the data or influence the conclusions. | This trial was funded, in part, by an unrestricted grant to Blaha from the PJ Schafer Cardiovascular Research Fund, a 501(c)(3) nonprofit organization. Martin was supported by a National Institutes of Health training grant (T32HL07024) for which Coresh served as the PI. Martin received additional support from the Pollin Cardiovascular Prevention Fellowship and the Marie-Josée and Henry R Kravis Endowed Fellowship. Furthermore, Martin received a modest monetary award in conjunction with the Howard C. Silverman prize for originality and creativity in medical research, which was awarded by the Johns Hopkins Division of Cardiology based on the preliminary design of the mActive trial. He also received a modest monetary award from the                                          | CONSORT-EHEALTH                   |

| Author, year    | Conflict of interest declaration                                                                                                                                                                                                                                                                                                                                                                                                                                                                                                                                                                                                                                                                                                                                                                                                                                                                                                                                                                                                         | Funding                                                                                                                                                                                                                                                                                                                                 | Adherence to reporting guidelines |
|-----------------|------------------------------------------------------------------------------------------------------------------------------------------------------------------------------------------------------------------------------------------------------------------------------------------------------------------------------------------------------------------------------------------------------------------------------------------------------------------------------------------------------------------------------------------------------------------------------------------------------------------------------------------------------------------------------------------------------------------------------------------------------------------------------------------------------------------------------------------------------------------------------------------------------------------------------------------------------------------------------------------------------------------------------------------|-----------------------------------------------------------------------------------------------------------------------------------------------------------------------------------------------------------------------------------------------------------------------------------------------------------------------------------------|-----------------------------------|
|                 |                                                                                                                                                                                                                                                                                                                                                                                                                                                                                                                                                                                                                                                                                                                                                                                                                                                                                                                                                                                                                                          | American Heart Association's Council on Lifestyle and Cardiometabolic Health with the Steven N. Blair Award for Excellence in Physical Activity Research. Long-term follow-up of mActive trial participants is being supported by the Aetna Foundation. Blumenthal was supported by the Kenneth Jay Pollin Professorship in Cardiology. |                                   |
| Thorndike, 2014 | The authors have declared that no competing interests exist.                                                                                                                                                                                                                                                                                                                                                                                                                                                                                                                                                                                                                                                                                                                                                                                                                                                                                                                                                                             | Dr. Thorndike is supported by the grant K23 HL93221 from the National Institutes of Health/National Heart Lung and Blood Institute. The funders had no role in study design, data collection and analysis, decision to publish, or preparation of the manuscript.                                                                       | CONSORT                           |
| Patel, 2019     | Dr Patel reported receiving personal fees as the owner of Catalyst Health LLC, stock options from LifeVest Health, personal fees and stock options from HealthMine, Inc, personal fees from Holistic Industries, and personal fees from Deloitte Consulting LLP outside the submitted work. Dr Reh reported receiving personal fees from Deloitte Consulting LLP during the conduct of the study and outside the submitted work and having a patent planned outside the submitted work. Dr Szwartz reported being employed by Deloitte Consulting LLP. Dr Guszcza reported receiving personal fees from Deloitte Consulting LLP during the conduct of the study and outside the submitted work. Dr Steier reported receiving personal fees from Deloitte Consulting LLP during the conduct of the study and outside the submitted work and having a patent planned outside the submitted work. Dr Kalra reported receiving personal fees from Deloitte Consulting LLP during the conduct of the study and outside the submitted work. No | This study was supported by Deloitte Consulting LLP and the University of Pennsylvania Health System through the Penn Medicine Nudge Unit (Dr Patel).                                                                                                                                                                                   | NR                                |

| Author, year    | Conflict of interest declaration                                                                                                                                                                                                                                                                                                                                                                                                                                                                                                                                                                                                                                                                                                                                                                                                                                                            | Funding                                                                                                                                                                                                                                                                                      | Adherence to reporting guidelines |
|-----------------|---------------------------------------------------------------------------------------------------------------------------------------------------------------------------------------------------------------------------------------------------------------------------------------------------------------------------------------------------------------------------------------------------------------------------------------------------------------------------------------------------------------------------------------------------------------------------------------------------------------------------------------------------------------------------------------------------------------------------------------------------------------------------------------------------------------------------------------------------------------------------------------------|----------------------------------------------------------------------------------------------------------------------------------------------------------------------------------------------------------------------------------------------------------------------------------------------|-----------------------------------|
|                 | other disclosures were reported.                                                                                                                                                                                                                                                                                                                                                                                                                                                                                                                                                                                                                                                                                                                                                                                                                                                            |                                                                                                                                                                                                                                                                                              |                                   |
| Ellingson, 2019 | None declared.                                                                                                                                                                                                                                                                                                                                                                                                                                                                                                                                                                                                                                                                                                                                                                                                                                                                              | NR                                                                                                                                                                                                                                                                                           | NR                                |
| Zhang, 2019     | The authors declare that they have no conflict of interest.                                                                                                                                                                                                                                                                                                                                                                                                                                                                                                                                                                                                                                                                                                                                                                                                                                 | NR                                                                                                                                                                                                                                                                                           | NR                                |
| Patel, 2018     | The author(s) declared the following potential conflicts of interest with respect to the research, authorship, and/or publication of this article: Dr. Patel is supported by career development awards from the Department of Veterans Affairs HSR&D and the Doris Duke Charitable Foundation. Dr. Patel is also founder of Catalyst Health, a technology and behavior change consulting firm. Dr. Patel also has received research funding from Deloitte, which is not related to the work described in this manuscript. Dr. Volpp and Dr. Asch are principals at VAL Health, a behavioral economics consulting firm. Dr. Volpp also has received consulting income from CVS Caremark and research funding from Humana, CVS Caremark, Discovery (South Africa), Hawaii Medical Services Association, Oscar, and Merck, none of which are related to the work described in this manuscript. | The author(s) disclosed receipt of the following financial support for the research, authorship, and/or publication of this article: This work was funded by the National Institute on Aging (RC4 AG039114) to Drs. Asch and Volpp.                                                          | NR                                |
| Robinson, 2018  | The authors have no conflict of interest and no financial interest or benefit.                                                                                                                                                                                                                                                                                                                                                                                                                                                                                                                                                                                                                                                                                                                                                                                                              | This work was supported by the National Institutes of Aging under Grants P30 AG048785 and 5T32AG000204.                                                                                                                                                                                      | NR                                |
| Fanning, 2017   | Jason Fanning, Sarah Roberts, Charles H. Hillman, Sean P. Mullen, Lee Ritterband, and Edward McAuley declares that they have no conflict of interest.                                                                                                                                                                                                                                                                                                                                                                                                                                                                                                                                                                                                                                                                                                                                       | NR                                                                                                                                                                                                                                                                                           | NR                                |
| Patel, 2017     | Dr Patel reported being supported by career development awards from the Department of Veterans Affairs Health Services Research and Development Service and the Doris Duke Charitable Foundation and reported being a principal at Catalyst Health, a technology and behavior change consulting firm. Dr                                                                                                                                                                                                                                                                                                                                                                                                                                                                                                                                                                                    | This study was funded by grants 1R01HL128914, 2R01HL092577, and P30AG034546 from the National Heart, Lung, and Blood Institute Division of Intramural Research. The Framingham Heart Study is funded by contracts N01-HC-25195 and HHSN268201500001I from the National Institutes of Health. | NR                                |



| Author, year  | Conflict of interest declaration                                                                                                                                                                                                                                                                                                                                                                                                                                        | Funding                                                                                                                                                                                                                                                                                                                                                                                                                                                                                                                                        | Adherence to reporting guidelines |
|---------------|-------------------------------------------------------------------------------------------------------------------------------------------------------------------------------------------------------------------------------------------------------------------------------------------------------------------------------------------------------------------------------------------------------------------------------------------------------------------------|------------------------------------------------------------------------------------------------------------------------------------------------------------------------------------------------------------------------------------------------------------------------------------------------------------------------------------------------------------------------------------------------------------------------------------------------------------------------------------------------------------------------------------------------|-----------------------------------|
|               | Volpp reported being a principal at VAL Health, a behavioral economics consulting firm, and reported receiving consulting income from CVS Caremark and research funding from Humana, CVS Caremark, Discovery (South Africa), Hawaii Medical Services Association, and Merck, none of which are related to the work described in this article. Dr Fox reported becoming an employee of Merck Research Laboratories in December 2015. No other disclosures were reported. |                                                                                                                                                                                                                                                                                                                                                                                                                                                                                                                                                |                                   |
| John, 2016    | NR                                                                                                                                                                                                                                                                                                                                                                                                                                                                      | NR                                                                                                                                                                                                                                                                                                                                                                                                                                                                                                                                             | NR                                |
| King, 2016    | The authors have declared that no competing interests exist.                                                                                                                                                                                                                                                                                                                                                                                                            | This work was supported by US Public Health Service grant #RC1 HL099340 from the National Heart, Lung, & Blood Institute of the National Institutes of Health (NIH) awarded to Dr. King; US Public Health Service Grant 1U54EB020405 supporting The National Center for Mobility Data Integration and Insight; and US Public Health Service grant #5T32L007034 from the National Heart, Lung, & Blood Institute. The funders had no role in study design, data collection and analysis, decision to publish, or preparation of the manuscript. | CONSORT                           |
| Melton, 2016  | The authors declared no potential conflicts of interest with respect to the research, authorship, and/or publication of this article.                                                                                                                                                                                                                                                                                                                                   | The authors disclosed receipt of the following financial support for the research, authorship, and/or publication of this article: Office Research and Sponsored Services at Georgia Southern University which provided seed funding for this project (H13451).                                                                                                                                                                                                                                                                                | NR                                |
| Patel, 2016 I | Dr. Volpp and Dr. Asch are principals at the behavioral economics consulting firm, VAL Health. Dr. Volpp also has received consulting income from CVS Caremark and research funding from Humana, CVS Caremark, Discovery (South Africa), and Merck, none of which are related to the work described in this manuscript. The authors declare no other conflicts of                                                                                                       | This work was funded by the National Institute on Aging (RC4 AG039114) to Drs. Asch and Volpp. Drs. Patel, Asch and Volpp were supported in part by the Department of Veteran Affairs and Drs. Patel and Asch were supported in part by the Robert Wood Johnson Foundation. The funding sources had no role in the design and conduct of the study; collection, management, analysis, and interpretation of the data; and                                                                                                                      | NR                                |

| Author, year   | Conflict of interest declaration                                                                                                        | Funding                                                                                                                                                                                                                                                                                                                                                                                                                                                                                                                                                                 | Adherence to reporting guidelines |
|----------------|-----------------------------------------------------------------------------------------------------------------------------------------|-------------------------------------------------------------------------------------------------------------------------------------------------------------------------------------------------------------------------------------------------------------------------------------------------------------------------------------------------------------------------------------------------------------------------------------------------------------------------------------------------------------------------------------------------------------------------|-----------------------------------|
|                | interest.                                                                                                                               | preparation, review, or approval of the manuscript; and decision to submit the manuscript for publication. Dr. Patel had full access to all the data in the study and takes responsibility for the integrity of the data and the accuracy of the data analysis.                                                                                                                                                                                                                                                                                                         |                                   |
| Patel, 2016 II | The author(s) declared no potential conflicts of interest with respect to the research, authorship, and/or publication of this article. | The author(s) disclosed receipt of the following financial support for the research, authorship, and/or publication of this article: This work was funded by the National Institute on Aging (RC4 AG039114) to Drs Asch and Volpp. Dr Patel was supported in part by the Department of Veteran Affairs and the Robert Wood Johnson Foundation. Dr. Volpp also has received consulting income from CVS Caremark and research funding from Humana, CVS Caremark, Discovery (South Africa), and Merck, none of which are related to the work described in this manuscript. | NR                                |
| Walsh, 2016    | None declared.                                                                                                                          | NR                                                                                                                                                                                                                                                                                                                                                                                                                                                                                                                                                                      | NR                                |
| Cowdery, 2015  | NR                                                                                                                                      | NR                                                                                                                                                                                                                                                                                                                                                                                                                                                                                                                                                                      | NR                                |
| Wang, 2015     | No competing financial interests exist.                                                                                                 | This research was supported by a gift from the Carol Vassiliadis family and in part by grant CA-113710 from the National Cancer Institute.                                                                                                                                                                                                                                                                                                                                                                                                                              | NR                                |
| Glynn, 2014    | The authors have declared no competing interests.                                                                                       | Funding was awarded by the European Union's Northern Periphery Programme 2007–2013, through the Implementing Transnational Telemedicine Solutions project (reference number: 7.13). The funder had no role in: the design and conduct of the study; collection, management, analysis, and interpretation of the data; preparation, review, or approval of the manuscript; and decision to submit the manuscript for publication.                                                                                                                                        | CONSORT                           |

Abbreviations: CONSORT: Consolidated Standards of Reporting Trials; NR: not reported

**Supplement 15: eTable 8. Information about outcomes from each study included in the meta-analysis**

| First author, year <sup>a</sup> | Outcome included in meta-analysis    | Outcome measurement <sup>a</sup>        |
|---------------------------------|--------------------------------------|-----------------------------------------|
| Wyke, 2019                      | Daily step count *                   | Accelerometer (ActivPal)                |
| Donoghue, 2018                  | Weekly days exercised <sup>b</sup>   | Self-reported                           |
| Pope, 2018                      | Daily step count*                    | Accelerometer (ActiGraph)               |
| Vandelanotte, 2018              | Total physical activity (min/week) * | Survey (8-item Active Australia Survey) |
| Ashton, 2017                    | Daily step count *                   | Pedometer (Yamax digiwalker)            |
| Brakenridge, 2016               | Daily step count <sup>c</sup>        | Accelerometer (ActivPal)                |
| Finkelstein, 2016               | MVPA (bout min/week) *               | Accelerometer (ActiGraph)               |
| Poirier, 2016                   | Daily step count *                   | Tracker (Pebble+)                       |
| Ashe, 2015                      | Daily step count <sup>d</sup>        | Accelerometer (ActiGraph)               |
| Cadmus-Bertram, 2015            | MVPA (min/week) *                    | Accelerometer (ActiGraph)               |
| Martin, 2015                    | Daily step count *                   | Tracker (Fitbug)                        |
| Thorndike, 2014                 | Daily step count *                   | Tracker (Fitbit)                        |
| Patel, 2019                     | Daily step count *                   | Tracker (Withings Activité Steel)       |
| Ellingson, 2019                 | Daily step count *                   | Accelerometer (ActiGraph)               |
| Zhang, 2019                     | Daily step count <sup>e</sup>        | Tracker (Fitbit)                        |
| Patel, 2018                     | Daily step count <sup>f</sup>        | App (Moves)                             |
| Robinson, 2018                  | Daily step count *                   | Tracker (Fitbit)                        |
| Fanning, 2017                   | MVPA (min/week) *                    | Accelerometer (ActiGraph)               |
| Patel, 2017                     | Daily step count <sup>g</sup>        | App (Moves) and tracker (Fitbit)        |
| John, 2016                      | Daily step count *                   | Tracker (Fitbit)                        |
| King, 2016                      | MVPA (min/week) *                    | Study app                               |
| Melton, 2016                    | Daily step count *                   | Accelerometer (ActiGraph)               |
| Patel, 2016 I                   | Daily step count <sup>h</sup>        | App (Moves)                             |
| Patel, 2016 II                  | Daily step count <sup>i</sup>        | App (Moves)                             |
| Walsh, 2016                     | Daily step count *                   | App (Accupedo-Pro)                      |
| Cowdery, 2015                   | MET (/week) *                        | Survey (IPAQ 7-item)                    |
| Wang, 2015                      | Daily step count *                   | Accelerometer (ActiGraph)               |
| Glynn, 2014                     | Daily step count *                   | App (Accupedo-Pro)                      |

<sup>a</sup>Accelerometers and pedometers (research-grade devices) are distinguished from trackers because the latter are consumer-grade devices; <sup>b</sup>Not possible to use the primary outcome—daily step count—because it was not measured in the control group; <sup>c</sup>The primary outcome was average time per day spent sitting during work hours and overall—for consistency with outcomes extracted from other studies we included daily step count in the meta-analysis; <sup>d</sup>The authors defined their primary outcome as “recruitment and retention rates”; <sup>e</sup>The primary outcome was “meeting the goal of engaging in at least 90 min/day of light physical activity during the 3-month study period”—for consistency we included daily step count in the meta-analysis instead of the odds ratio for the primary outcome; <sup>f</sup>The primary outcome was the “mean proportion of participant-days that the 7000-step goal was achieved during the intervention period”—for consistency we included daily step count in the meta-analysis; <sup>g</sup>The primary outcome was the “proportion of participant-days that step goals were achieved during the intervention period”—for consistency we included daily step count in the meta-analysis. \* indicates primary outcomes. Abbreviations: App: smartphone application; AQuAA: Activity questionnaire for adolescents and adults; h: hours; IPAQ: International Physical Activity Questionnaire; min: minutes; MET: metabolic equivalent; MVPA: moderate to vigorous physical activity; SLIPA: Sedentary and Light Intensity Physical Activity Log. MVPA bouts are defined as the total number of minutes during each one-week assessment period in which moderate or vigorous activity of at least eight of 10 consecutive minutes are reached.

**Supplement 16: eTable 9. Engagement with the intervention and retention rates in included studies**

| Author, year       | Engagement with the intervention (article quotes)                                                                                                                                                                                                                                                                                                                                                                                                                                                                                                                                                                                                                                                                                                                                                                                                                                | Metrics                                                                                                                                                                   | Retention rates<br>N (%)            |
|--------------------|----------------------------------------------------------------------------------------------------------------------------------------------------------------------------------------------------------------------------------------------------------------------------------------------------------------------------------------------------------------------------------------------------------------------------------------------------------------------------------------------------------------------------------------------------------------------------------------------------------------------------------------------------------------------------------------------------------------------------------------------------------------------------------------------------------------------------------------------------------------------------------|---------------------------------------------------------------------------------------------------------------------------------------------------------------------------|-------------------------------------|
| Wyke, 2019         | "65.1% of intervention participants reported they used the SitFIT 'a great deal' (score 4 on a scale of 0–4) and 36.8% reported they used MatchFIT 'a great deal'"                                                                                                                                                                                                                                                                                                                                                                                                                                                                                                                                                                                                                                                                                                               | -Self-reported usage score (scale of 0 to 4)                                                                                                                              | I: 492/560 (88);<br>C: 508/553 (92) |
| Donoghue, 2018     | "six participants were not compliant wearing the activity tracker (if they did not sync the tracker for over 1 month). It is worth noting that 18 (23%) of the activity Fitbits were lost throughout the study and were replaced by the institution conducting the study."                                                                                                                                                                                                                                                                                                                                                                                                                                                                                                                                                                                                       | -Participants not syncing the tracker for over 1 month<br>-Trackers lost                                                                                                  | I: 35/40 (88);<br>C: 40/40 (100)    |
| Pope, 2018         | "Combined, both groups demonstrated high adherence to Facebook-delivered health education intervention: $87.1 \pm 21.9\%$ . When stratified by group, it was found that the comparison group demonstrated lower adherence ( $84.4 \pm 22.3\%$ ) to the health education intervention than the experimental group ( $89.8 \pm 21.8\%$ )."; "experimental group participants reported the Polar M400 to be "somewhat useful" to "useful" for assisting them in becoming more active and stated the smartwatch to be "somewhat easy" to use, with the most frequently reported positive and negative features of the device reported as the "exercise bar" on the main screen and the difficult smartphone syncing process, respectively."                                                                                                                                          | -Adherence to Facebook-delivered education (combined measure using "likes" and "seen by")<br>-User perspectives (Usefulness, ease-of-use, positive and negative features) | I: 16/19 (84);<br>C: 19/19 (100)    |
| Vandelanotte, 2018 | "73.1 % participants said they "wore the Fitbit every day during the study."                                                                                                                                                                                                                                                                                                                                                                                                                                                                                                                                                                                                                                                                                                                                                                                                     | -Self-reported daily usage (%)                                                                                                                                            | I: 78/121 (64);<br>C: 46/122 (38)   |
| Ashton, 2017       | "Jawbone™ wearable physical activity tracker and UP app: Data from the process evaluation questionnaire showed that most participants (95.8%, n = 23) reported using the Jawbone™ and UP app, and 58.3% (n = 14) reported meeting the recommended frequency of use (daily). Objective data from the Jawbone UP app was available for 21 of the 24 retained participants (log in details had been changed for three participants, so sign in was not possible to access data). Additionally, an error occurred within Jawbone, which meant that no data was recorded for the final 19 days of the intervention, hence data was only available for 65 out of the 84 days. Objective data for the 21 participants indicates that all of these participants used the Jawbone UP during the intervention. Step counts were uploaded for an average of 48 (SD 19) out of the available | -Any usage<br>-Self-reported daily usage (%)<br>-Average number of days with valid step counts<br>-Facebook interaction (e.g. "likes")                                    | I: 24/26 (92);<br>C: 23/24 (96)     |

| Author, year         | Engagement with the intervention (article quotes)                                                                                                                                                                                                                                                                                                 | Metrics                                                                                                                                  | Retention rates<br>N (%)            |
|----------------------|---------------------------------------------------------------------------------------------------------------------------------------------------------------------------------------------------------------------------------------------------------------------------------------------------------------------------------------------------|------------------------------------------------------------------------------------------------------------------------------------------|-------------------------------------|
|                      | 65 days (range of 10–65 days/participant).”; “All participants (100%, n=24) joined the program Facebook group, with a total of 23 posts, including 22 posts by the moderator. There was an average of 20 views and 1.8 ‘likes’ per post. In total, 75% (n=18) reported meeting the recommended frequency of use (reading weekly Facebook posts).” |                                                                                                                                          |                                     |
| Brakenridge, 2016    | “LUMOback usage had ceased by 12 months in all study completers. Reasons for non-use included technical difficulties and having no time to set up.”; “Use of LUMOback at least once in first 3 months: n=43/61”; “18 participants did not uptake the LUMOback”; “Any use of LUMOback in study completers at 12 months: n=0/25”.                   | -Usage at least once in the first 3 months<br>-Participants with no uptake<br>-Study completers showing any use of LUMOback at 12 months | I: 68/87 (78);<br>C: 41/66 (62)     |
| Finkelstein, 2016    | “By 6 months <65% of participants in the Fitbit group were still wearing the device at least once/week.”                                                                                                                                                                                                                                          | -Participants using the tracker once/week at 6 months (%)                                                                                | I: 186/203 (92);<br>C: 189/201 (94) |
| Poirier, 2016        | “Participants wore their activity tracker on 78.6% (33/42) of days and visited the website every 3.6 days on average (11.8/42 days).”                                                                                                                                                                                                             | -Daily usage (%)                                                                                                                         | I: 107/133 (80);<br>C: 110/132 (83) |
| Ashe, 2015           | NR                                                                                                                                                                                                                                                                                                                                                | NR                                                                                                                                       | I: 12/13 (92);<br>C: 8/12 (67)      |
| Cadmus-Bertram, 2015 | “Intervention participants reported using the tracker on 95% of study days”                                                                                                                                                                                                                                                                       | -Self-reported daily usage (%)                                                                                                           | I: 25/25 (100);<br>C: 24/26 (92)    |
| Martin S, 2015       | “Daily activity data capture was 97.4%.”                                                                                                                                                                                                                                                                                                          | -Daily usage (%)                                                                                                                         | I: 16/16 (100);<br>C: 15/16 (94)    |
| Thorndike, 2014      | “Daily usage of the tracker: 77% in both groups”                                                                                                                                                                                                                                                                                                  | -Daily usage (%)                                                                                                                         | I: 50/52 (96);<br>C: 49/52 (94)     |
| Patel, 2019          | Missing data from the tracker in the control group was 28.8% and in the intervention (gamification with competition) was 18.8%.                                                                                                                                                                                                                   | -Missing data (%)                                                                                                                        | I: 143/150 (95);<br>C: 150/151 (99) |
| Elingson, 2019       | “Across the 12 weeks of the study, participants in both groups decreased the number of days/week the Fitbit was worn, with more notable declines in the final weeks (average 6.5 days/week in week 1 to average 4.5 days/week in week 12)”                                                                                                        | -Average number of days/week the tracker was used                                                                                        | I: NR/45 (NR);<br>C: NR/46 (NR)     |
| Zhang, 2019          | “The total percentage of participant days on which Fitbit tracked behavior data were missing during the 90-day intervention was 16%. The mean number of logins to the app per day during the 90-day study period was 2.4 (SD=4.4) in the intervention and 1.1 (SD=2.8) in the control condition.”                                                 | -Missing data (%)<br>-Average number of app logins during study                                                                          | I: 43/44 (98);<br>C: 47/47 (100)    |
| Patel, 2018          | NR                                                                                                                                                                                                                                                                                                                                                | NR                                                                                                                                       | I: 136/144 (94);                    |

| Author, year   | Engagement with the intervention (article quotes)                                                                                                                                                                                                                                                                                                                                                                                                                            | Metrics                                                                  | Retention rates<br>N (%)                  |
|----------------|------------------------------------------------------------------------------------------------------------------------------------------------------------------------------------------------------------------------------------------------------------------------------------------------------------------------------------------------------------------------------------------------------------------------------------------------------------------------------|--------------------------------------------------------------------------|-------------------------------------------|
|                |                                                                                                                                                                                                                                                                                                                                                                                                                                                                              |                                                                          | C: 60/65 (92)                             |
| Robinson, 2018 | NR                                                                                                                                                                                                                                                                                                                                                                                                                                                                           | NR                                                                       | I: 29/31 (94);<br>C: 30/32 (94)           |
| Fanning, 2017  | "The random linear effect for time was significant, indicating that use decreased across the intervention period. The fixed effect for the goal setting module was also significant, as was the fixed effect for the points module, indicating the addition of either module was related to higher levels of usage."                                                                                                                                                         | -Usage time<br>-Modules used                                             | I: 26/29 (89);<br>C: 27/30 (90)           |
| Patel, 2017    | NR                                                                                                                                                                                                                                                                                                                                                                                                                                                                           | NR                                                                       | I: 98/102 (96);<br>C: 102/104 (98)        |
| John, 2016     | The percentage of individuals with missing fitbit data on at least one day was 72.74% in the intervention and 69.16% in the control.                                                                                                                                                                                                                                                                                                                                         | -Missing data (%)                                                        | I: 1027/1027 (100);<br>C: 1028/1028 (100) |
| King, 2016     | "During the study period, 91.3% of social app participants used the message board, with a total of 775 messages posted."                                                                                                                                                                                                                                                                                                                                                     | -Participants using the app message board (%)                            | I: 22/22 (100);<br>C: 24/27 (89)          |
| Melton, 2016   | NR                                                                                                                                                                                                                                                                                                                                                                                                                                                                           | NR                                                                       | I: 17/28 (61);<br>C: 33/41 (80)           |
| Patel, 2016 I  | NR                                                                                                                                                                                                                                                                                                                                                                                                                                                                           | NR                                                                       | I: 78/80 (98);<br>C: 64/68 (94)           |
| Patel, 2016 II | NR                                                                                                                                                                                                                                                                                                                                                                                                                                                                           | NR                                                                       | I: 59/64 (92);<br>C: 99/100 (99)          |
| Walsh, 2016    | NR                                                                                                                                                                                                                                                                                                                                                                                                                                                                           | NR                                                                       | I: 28/29 (97);<br>C: 27/29 (93)           |
| Cowdery, 2015  | NR                                                                                                                                                                                                                                                                                                                                                                                                                                                                           | NR                                                                       | I: 20/20 (100);<br>C: 19/20 (95)          |
| Wang, 2015     | "a greater proportion of comparison (versus intervention) participants reported that, on a typical day, they viewed their Fitbit trackers "Very Often" or "Often" for steps (90% versus 71%) and distance (70% versus 55%)."; "a common response among participants was that they had stopped reading them altogether when they noticed that the messages were "automated." Other notable phrases were that the messages were "inconvenient," "annoying," and "impersonal."" | -Self-reported viewing of step counts in the tracker (Likert-type scale) | I: 31/33 (94);<br>C: 30/34 (88)           |
| Glynn, 2014    | NR                                                                                                                                                                                                                                                                                                                                                                                                                                                                           | NR                                                                       | I: 37/45 (82);<br>C: 40/45 (89)           |

Abbreviations: C: control; I: intervention; NR: not reported.

**Supplement 17: eTable 10. Incentives for study compliance in included studies**

| Author, year       | Incentives to study procedures compliance and study completion                                                                                                                                                                                                                                                                                                                               |
|--------------------|----------------------------------------------------------------------------------------------------------------------------------------------------------------------------------------------------------------------------------------------------------------------------------------------------------------------------------------------------------------------------------------------|
| Wyke, 2019         | A club store voucher for the equivalent of €25 at post-programme and €75 at the 12-month measurements.                                                                                                                                                                                                                                                                                       |
| Donoghue, 2018     | NR                                                                                                                                                                                                                                                                                                                                                                                           |
| Pope, 2018         | Both groups received a \$10 cash incentive after completion of each testing period (i.e., baseline testing and testing during the sixth and 12th weeks; \$30 total).                                                                                                                                                                                                                         |
| Vandelanotte, 2018 | Participants who complied with all study procedures received an \$50 incentive for their participation; those in the Fitbit group were able to decline the incentive in exchange for keeping the Fitbit they received (informed about this option at the end of the study).                                                                                                                  |
| Ashton, 2017       | Control participants received incentives for returning to the follow-up session (e.g. \$10 voucher to cover travel expenses).                                                                                                                                                                                                                                                                |
| Brakenridge, 2016  | NR                                                                                                                                                                                                                                                                                                                                                                                           |
| Finkelstein, 2016  | Incentive to participants: 4\$/week; 25\$ supermarket voucher and a 1 in 10 chance of receiving a 50\$ voucher for completing the 6-month assessment.                                                                                                                                                                                                                                        |
| Poirier, 2016      | All study participants were allowed to keep the activity tracker at the end of the study. Participants who completed follow-up also received a US \$25 Amazon gift card.                                                                                                                                                                                                                     |
| Ashe, 2015         | NR                                                                                                                                                                                                                                                                                                                                                                                           |
| Cadmus, 2015       | Participants received \$20 for study completion.                                                                                                                                                                                                                                                                                                                                             |
| Martin S, 2015     | NR                                                                                                                                                                                                                                                                                                                                                                                           |
| Thorndike, 2014    | NR                                                                                                                                                                                                                                                                                                                                                                                           |
| Patel, 2019        | All participants received \$25 for enrolling in the trial, \$50 for completing the 24-week intervention and surveys, and \$50 for completing the 12-week follow-up and surveys.                                                                                                                                                                                                              |
| Elingson, 2019     | NR                                                                                                                                                                                                                                                                                                                                                                                           |
| Zhang, 2019        | Participants received \$15 at the baseline assessment, \$35 at the 1-month assessment, \$50 at the 3-month final assessment, and the Fitbit.                                                                                                                                                                                                                                                 |
| Patel, 2018        | All participants received \$25 for enrolling and \$75 for completing the 13-week intervention period and a survey on their experience. There was no participation incentive for the 13-week follow-up period.                                                                                                                                                                                |
| Robinson, 2018     | Participants were given the Fitbit as compensation for their participation. If participants decided to stop participating in the study, or they decided they did not want to keep the Fitbit at the end, they received monetary compensation relative to their time in the study (\$10 for pre-test assessment and \$1 for each of the 35 study days, totalling to a possible \$45 dollars). |
| Fanning, 2017      | NR                                                                                                                                                                                                                                                                                                                                                                                           |
| Patel, 2017        | Participants who received a wearable device were allowed to keep it; no other financial compensation was offered.                                                                                                                                                                                                                                                                            |
| John, 2016         | NR                                                                                                                                                                                                                                                                                                                                                                                           |
| King, 2016         | Participants received a US \$20 gift card for participating in the study.                                                                                                                                                                                                                                                                                                                    |
| Melton, 2016       | Following the 6-week intervention, participants were given the Jawbone UP Band and encouraged to use the platform as an incentive for participation.                                                                                                                                                                                                                                         |
| Patel, 2016 I      | All participants received \$25 for enrolling in the study and \$75 for participating through the primary endpoint at 13 weeks.                                                                                                                                                                                                                                                               |
| Patel, 2016 II     | NR                                                                                                                                                                                                                                                                                                                                                                                           |
| Walsh, 2016        | NR                                                                                                                                                                                                                                                                                                                                                                                           |
| Cowdery, 2015      | NR                                                                                                                                                                                                                                                                                                                                                                                           |
| Wang, 2015         | NR                                                                                                                                                                                                                                                                                                                                                                                           |
| Glynn, 2014, UK    | NR                                                                                                                                                                                                                                                                                                                                                                                           |

Abbreviations: NR: not reported.



**Supplement 18: eTable 11. Behaviour change techniques, theories, models, and constructs in included studies**

| Author, year | Characteristics and BCTs of the intervention <sup>abcd</sup>                                                                                                                                                                                                                                                                                                                                                                                                                                                                                                                                                                                                                                                                                                                                                                                                                                                                                                                                                                                                                              |                                                                                                                                                                                                                                                                                                                                                                                                                                                                                                                                                                                                                                                                                                                                                                                                                                                                              | Characteristics and BCTs of the control <sup>e</sup> | Behaviour change theories, models or constructs mentioned                       |
|--------------|-------------------------------------------------------------------------------------------------------------------------------------------------------------------------------------------------------------------------------------------------------------------------------------------------------------------------------------------------------------------------------------------------------------------------------------------------------------------------------------------------------------------------------------------------------------------------------------------------------------------------------------------------------------------------------------------------------------------------------------------------------------------------------------------------------------------------------------------------------------------------------------------------------------------------------------------------------------------------------------------------------------------------------------------------------------------------------------------|------------------------------------------------------------------------------------------------------------------------------------------------------------------------------------------------------------------------------------------------------------------------------------------------------------------------------------------------------------------------------------------------------------------------------------------------------------------------------------------------------------------------------------------------------------------------------------------------------------------------------------------------------------------------------------------------------------------------------------------------------------------------------------------------------------------------------------------------------------------------------|------------------------------------------------------|---------------------------------------------------------------------------------|
|              | Tracker and/or app                                                                                                                                                                                                                                                                                                                                                                                                                                                                                                                                                                                                                                                                                                                                                                                                                                                                                                                                                                                                                                                                        | Other components of the intervention                                                                                                                                                                                                                                                                                                                                                                                                                                                                                                                                                                                                                                                                                                                                                                                                                                         |                                                      |                                                                                 |
| Wyke, 2019   | <b>Tracker (SitFIT) + App (MatchFIT)</b><br>2.2 Feedback on behaviour<br>2.3 Self-monitoring of behaviour<br>3.1 Social support (unspecified)<br>6.2 Social comparison<br>--<br>[2.2 “The SitFIT provided the wearer with feedback on their Physical Activity and Sedentary Behavior”; 2.3 “allow self-monitoring of sedentary and non-sedentary time, in addition to daily steps”; 3.1 “use of MatchFit as a means for participants to support one another”; 6.2 “MatchFIT allowed participants to contribute their weekly steps to their group’s collective average step count and compare it with that of a virtual competitor team.” MatchFIT also provided a “week by week summary of SitFIT data”]<br><br>“the SitFIT was designed with a display to provide real-time visual feedback of stepping and sedentary/upright behaviors, a vibrotactile actuator to provide customisable haptic feedback of time spent sitting, and a Bluetooth SMART module to enable communication with external devices, such as smartphones, tablets, and PCs.”<br>DOI: 10.1249/MSS.0000000000001458 | <b>12 weekly group training sessions (90 min) with coaches</b><br>1.1 Goal setting<br>1.4 Action planning<br>1.5 Review behaviour goal(s)<br>1.7 Review outcome goal(s)<br>3 Social support<br>4.1 Instruction on how to perform the behaviour<br>5.1 Information about health consequences<br>5.6 Information about emotional consequences<br>8.1 Behavioural practice<br>8.7 Graded tasks<br>9.1 Credible sources<br>13.5 Identity associated with changed behaviour<br>--<br>[1.1 “set weekly goals”; 1.4 “action planning”; 1.5, 1.7 “reviewing goals for behaviours and outcomes”; 3.1 “encouraging positive banter (...) promoting a ‘team’ environment”; 4.1 “tips to change diet or increase physical activity (...) Coaches taught participants to choose from a ‘toolbox’ of behaviour change techniques (including setting and reviewing goals for behaviours and | None                                                 | Behaviour Change Techniques, Self-Determination Theory, Achievement Goal Theory |



| Author, year              | Characteristics and BCTs of the intervention <sup>abcd</sup>                                                         |                                                                                                                                                                                                                                                                                                                                                                                                                                                                                                                                                                                                                                                                                             | Characteristics and BCTs of the control <sup>e</sup> | Behaviour change theories, models or constructs mentioned |
|---------------------------|----------------------------------------------------------------------------------------------------------------------|---------------------------------------------------------------------------------------------------------------------------------------------------------------------------------------------------------------------------------------------------------------------------------------------------------------------------------------------------------------------------------------------------------------------------------------------------------------------------------------------------------------------------------------------------------------------------------------------------------------------------------------------------------------------------------------------|------------------------------------------------------|-----------------------------------------------------------|
|                           | Tracker and/or app                                                                                                   | Other components of the intervention                                                                                                                                                                                                                                                                                                                                                                                                                                                                                                                                                                                                                                                        |                                                      |                                                           |
|                           |                                                                                                                      | outcomes, action planning, self-monitoring, and information about health and emotional consequences of change) and to emphasise personally relevant benefits of behaviour change"; 5.1, 5.6 "information about health and emotional consequences of change"; 8.1 "graded group-based physical activity"; 8.7 "slowly increase the number of steps and time spent upright each week"; 9.1 "we developed detailed manuals for coaches and participants, and trained club coaches over 2 days to deliver programme content in an appropriate and accessible style"; 13.5 "support to change their behaviours that may challenge their masculine identities, but is not in conflict with them"] |                                                      |                                                           |
| DiFranciso-Donoghue, 2018 | <b>Arm: "Fitbit Plus" intervention</b>                                                                               |                                                                                                                                                                                                                                                                                                                                                                                                                                                                                                                                                                                                                                                                                             | None                                                 | NR                                                        |
|                           | <b>Fitbit Flex tracker</b><br>2.2 Feedback on behaviour<br>2.3 Self-monitoring of behaviour<br><br>[2.2, 2.3 Fitbit] | <b>Weekly emails + mentored weekly walk/runs</b><br>1.1 Goal setting (behaviour)<br>2.2 Feedback on behaviour<br>6.2 Social comparison<br>8.1 Behaviour practice/rehearsal<br>8.2 Behaviour substitution                                                                                                                                                                                                                                                                                                                                                                                                                                                                                    |                                                      |                                                           |

| Author, year | Characteristics and BCTs of the intervention <sup>abcd</sup>                                                                                                                                                                                                                                                                                                                                                                                                                  |                                                                                                                                                                                                                                                                                                                                                                                                                                                                                                                                                                                                                | Characteristics and BCTs of the control <sup>e</sup>                                                                                                                                  | Behaviour change theories, models or constructs mentioned |
|--------------|-------------------------------------------------------------------------------------------------------------------------------------------------------------------------------------------------------------------------------------------------------------------------------------------------------------------------------------------------------------------------------------------------------------------------------------------------------------------------------|----------------------------------------------------------------------------------------------------------------------------------------------------------------------------------------------------------------------------------------------------------------------------------------------------------------------------------------------------------------------------------------------------------------------------------------------------------------------------------------------------------------------------------------------------------------------------------------------------------------|---------------------------------------------------------------------------------------------------------------------------------------------------------------------------------------|-----------------------------------------------------------|
|              | Tracker and/or app                                                                                                                                                                                                                                                                                                                                                                                                                                                            | Other components of the intervention                                                                                                                                                                                                                                                                                                                                                                                                                                                                                                                                                                           |                                                                                                                                                                                       |                                                           |
|              |                                                                                                                                                                                                                                                                                                                                                                                                                                                                               | 8.7 Graded tasks<br>12.1 Restructuring the physical environment<br>--<br>[1.1 “The goal was to attain at least 10,000 steps daily”; 2.2 “feedback on step count”; 6.2 “These weekly emails provided feedback on group step count as a total compared with the other group.”; 8.1 mentored weekly walk/runs; 8.2 “take the stairs in lieu of the elevators”; 8.7 “encourage and increase step count by 500 steps daily per week”; 12.1 “Participants were encouraged to park their cars as far as possible to add extra steps, and were urged to take the stairs in lieu of the elevators throughout the day.”] |                                                                                                                                                                                       |                                                           |
| Pope, 2018   | <b>Tracker (Polar M400) + app</b><br>2.2 Feedback on behaviour<br>2.3 Self-monitoring of behaviour<br>--<br>[2.3 “track physical activity duration, steps per day, and energy expenditure.”; “The Polar M400 can upload health metric data to an associated smartphone application (via bluetooth) and internet portal regarding the user’s steps per day; time spent lying down, sitting, and standing; durations of moderate and vigorous physical activity; daily activity | <b>Twice weekly health education via Facebook group</b><br>4.1 Instruction on how to perform the behaviour<br>--<br>[“physical activity and nutritious eating health education tips”]                                                                                                                                                                                                                                                                                                                                                                                                                          | <b>Twice weekly health education via Facebook group</b><br>4.1 Instruction on how to perform the behaviour<br>--<br>[“physical activity and nutritious eating health education tips”] | Social cognitive theory, Self-determination theory        |

| Author, year       | Characteristics and BCTs of the intervention <sup>abcd</sup>                                                                                                                                            |                                                                                                                                                                                                                                                        | Characteristics and BCTs of the control <sup>e</sup>                                                                                                                                                                                                                                                                                                                                                                                                                                                                                                                                                                                                                                                                                                                                                                                               | Behaviour change theories, models or constructs mentioned                       |
|--------------------|---------------------------------------------------------------------------------------------------------------------------------------------------------------------------------------------------------|--------------------------------------------------------------------------------------------------------------------------------------------------------------------------------------------------------------------------------------------------------|----------------------------------------------------------------------------------------------------------------------------------------------------------------------------------------------------------------------------------------------------------------------------------------------------------------------------------------------------------------------------------------------------------------------------------------------------------------------------------------------------------------------------------------------------------------------------------------------------------------------------------------------------------------------------------------------------------------------------------------------------------------------------------------------------------------------------------------------------|---------------------------------------------------------------------------------|
|                    | Tracker and/or app                                                                                                                                                                                      | Other components of the intervention                                                                                                                                                                                                                   |                                                                                                                                                                                                                                                                                                                                                                                                                                                                                                                                                                                                                                                                                                                                                                                                                                                    |                                                                                 |
|                    | time; energy expenditure; and sleep.”]                                                                                                                                                                  |                                                                                                                                                                                                                                                        |                                                                                                                                                                                                                                                                                                                                                                                                                                                                                                                                                                                                                                                                                                                                                                                                                                                    |                                                                                 |
| Vandelanotte, 2018 | <b>Fitbit Flex tracker</b><br>2.2 Feedback on behaviour<br>2.3 Self-monitoring of behaviour<br>10.3 Non-specific reward<br>--<br>[2.2, 2.3 Fitbit; 10.3 “1 LED illuminates for every 2000 steps taken”] | <b>Same as control</b><br>1.1 Goal setting (behaviour)<br>1.2 Problem solving<br>1.4 Action planning<br>2.2 Feedback on behaviour<br>2.3 Self-monitoring of behaviour<br>3.1 Social support (unspecified)<br>5.1 Information about health consequences | <b>Website (TaylorActive)</b><br>1.1 Goal setting (behaviour)<br>1.2 Problem solving<br>1.4 Action planning<br>2.2 Feedback on behaviour<br>2.3 Self-monitoring of behaviour<br>3.1 Social support (unspecified)<br>5.1 Information about health consequences<br>--<br>[1.1, 1.2, 1.4, 2.3, 3.1 “training was provided on self-regulatory strategies to enhance the enactment of intentions into behaviour through effective goal-setting, action planning, use of social support, overcoming barriers, problem solving, decision making, relapse prevention, and self-monitoring”; 2.2 “On the basis of participant responses and using IF-THEN algorithms (eg, IF not meeting activity guideline, THEN provide advice to increase activity levels), relevant feedback is selected from a large database with all possible response options”; 5.1 | Theory of Planned Behaviour, Self-determination theory, Social cognitive theory |

| Author, year | Characteristics and BCTs of the intervention <sup>abcd</sup>                                                                                                                                                                          |                                                                                                                                                                                                                                                                                                                                                                                                                                                                                                                                                                                       | Characteristics and BCTs of the control <sup>e</sup>                                                                                                                                                                                                                                                                                                         | Behaviour change theories, models or constructs mentioned |
|--------------|---------------------------------------------------------------------------------------------------------------------------------------------------------------------------------------------------------------------------------------|---------------------------------------------------------------------------------------------------------------------------------------------------------------------------------------------------------------------------------------------------------------------------------------------------------------------------------------------------------------------------------------------------------------------------------------------------------------------------------------------------------------------------------------------------------------------------------------|--------------------------------------------------------------------------------------------------------------------------------------------------------------------------------------------------------------------------------------------------------------------------------------------------------------------------------------------------------------|-----------------------------------------------------------|
|              | Tracker and/or app                                                                                                                                                                                                                    | Other components of the intervention                                                                                                                                                                                                                                                                                                                                                                                                                                                                                                                                                  |                                                                                                                                                                                                                                                                                                                                                              |                                                           |
|              |                                                                                                                                                                                                                                       |                                                                                                                                                                                                                                                                                                                                                                                                                                                                                                                                                                                       | “Participants in both groups also had access to a Library with generic educational information about physical activity; a total of 19 brief articles were available about different aspects of physical activity and what to do to increase physical activity levels (eg, “Are you physically fit?,” “Getting motivated,” and “Making time to be active”).”] |                                                           |
| Ashton, 2017 | <b>Jawbone wearable tracker + app</b><br>1.1 Goal setting (behaviour)<br>2.2 Feedback on behaviour<br>2.3 Self-monitoring of behaviour<br>--<br>[1.1 “goal setting”; 2.2 Jawbone app; 2.3 “self-monitoring of key health behaviours”] | <b>Private Facebook discussion group + website + 1-hour weekly face-to-face sessions with researchers (11 group-based + 1 individual) + gymstick resistance band + TEMPlate Dinner disc</b><br>1.2 Problem solving<br>1.5 Review behaviour goal(s)<br>2.2 Feedback on behaviour<br>3.1 Social support (unspecified)<br>4.1 Instruction on how to perform the behaviour<br>6.1 Demonstration of the behaviour<br>8.1 Behaviour practice/rehearsal<br>8.3 Habit formation<br>9.1 Credible source<br>12.5 Adding objects to the environment<br>--<br>[1.2 “problem solving strategies to | None                                                                                                                                                                                                                                                                                                                                                         | Social Cognitive Theory, Self Determination Theory        |

| Author, year | Characteristics and BCTs of the intervention <sup>abcd</sup> |                                                                                                                                                                                                                                                                                                                                                                                                                                                                                                                                                                                                                                                                                                                                                                                                                                                                                                                                                                                                                                                                                                                                    | Characteristics and BCTs of the control <sup>e</sup> | Behaviour change theories, models or constructs mentioned |
|--------------|--------------------------------------------------------------|------------------------------------------------------------------------------------------------------------------------------------------------------------------------------------------------------------------------------------------------------------------------------------------------------------------------------------------------------------------------------------------------------------------------------------------------------------------------------------------------------------------------------------------------------------------------------------------------------------------------------------------------------------------------------------------------------------------------------------------------------------------------------------------------------------------------------------------------------------------------------------------------------------------------------------------------------------------------------------------------------------------------------------------------------------------------------------------------------------------------------------|------------------------------------------------------|-----------------------------------------------------------|
|              | Tracker and/or app                                           | Other components of the intervention                                                                                                                                                                                                                                                                                                                                                                                                                                                                                                                                                                                                                                                                                                                                                                                                                                                                                                                                                                                                                                                                                               |                                                      |                                                           |
|              |                                                              | address key issues apparent in young men"; 1.5, 2.2 "personalized feedback from a food and nutrient report (...), and from the Jawbone physical activity data. From this, personal tailored goals were set."; 3.1 "facilitate social support"; 4.1 "a 'resource library' housing relevant information and resources, including fact sheets from best practice guidelines, [...] and recommended mobile applications for improving eating habits, physical activity, reducing alcohol intake or coping with stress"; 6.1 "support videos (e.g. short cooking videos and demonstration of Gymstick™ exercises)"; 8.1 "practical exercise activities focusing on aerobic (e.g., team based recreational games) and strength exercises (e.g., High Intensity Interval Training)"; 8.3 "Group based sessions took place on Thursday evenings (18:00–19:00 pm)"; 9.1. "Sessions were delivered by two male researchers from the same age demographic (one was a qualified P.E. teacher, undertaking a PhD in Education and the other was a PhD candidate in Nutrition and Dietetics)"; 12.5 "A Gymstick™ resistance band, for home-based |                                                      |                                                           |

| Author, year      | Characteristics and BCTs of the intervention <sup>abcd</sup>                                                                                                                                                                                                                                                                                                                                                                                                |                                      | Characteristics and BCTs of the control <sup>e</sup>                                                                                                                                                                                                                                                                                                                                                                                                                                                                                                                                                                                                                                                                                                                                            | Behaviour change theories, models or constructs mentioned |
|-------------------|-------------------------------------------------------------------------------------------------------------------------------------------------------------------------------------------------------------------------------------------------------------------------------------------------------------------------------------------------------------------------------------------------------------------------------------------------------------|--------------------------------------|-------------------------------------------------------------------------------------------------------------------------------------------------------------------------------------------------------------------------------------------------------------------------------------------------------------------------------------------------------------------------------------------------------------------------------------------------------------------------------------------------------------------------------------------------------------------------------------------------------------------------------------------------------------------------------------------------------------------------------------------------------------------------------------------------|-----------------------------------------------------------|
|                   | Tracker and/or app                                                                                                                                                                                                                                                                                                                                                                                                                                          | Other components of the intervention |                                                                                                                                                                                                                                                                                                                                                                                                                                                                                                                                                                                                                                                                                                                                                                                                 |                                                           |
|                   |                                                                                                                                                                                                                                                                                                                                                                                                                                                             | strength training"]                  |                                                                                                                                                                                                                                                                                                                                                                                                                                                                                                                                                                                                                                                                                                                                                                                                 |                                                           |
| Brakenridge, 2016 | <b>LUMObacK (tracker + app)</b><br>2.3 Self-monitoring of behaviour<br>2.2. Feedback on behaviour<br>--<br>[2.2, 2.3 "which provided feedback on sitting, standing, stepping, sitting breaks, posture and sleep"; "The LUMObacK assesses activity by inertial sensors, which collect data at a constant 25 Hz, and is controlled through a mobile app via a Bluetooth connection that can be used by both iPhone operating system and Android platforms.""] | Same as control group                | <b>Educational booklet + emails + workplace champion</b><br>2.2 Feedback on behaviour<br>4.1 Instruction on how to perform the behaviour<br>5.1 Information about health consequences<br>6.3 Information about others approval<br>7.1. Prompts/cues<br>--<br>[2.2 "email that had a preliminary summary of the averaged activity monitor data from the baseline assessment"; 4.1 "Recommendations and tips to 'Stand Up, Sit Less and Move More'; 5.1 "booklet contained background information on sitting and health implications"; 6.3 "To visibly demonstrate support for the program and its messages, senior executives took part in the baseline assessment and received the five emails. Their participation in the study was communicated to participants by the champion." 7.1 emails] | NR                                                        |

| Author, year      | Characteristics and BCTs of the intervention <sup>abcd</sup>                                                                                                                                                                                                                                                                                                                                                                                                                                 |                                                                                                                                                                                                                                                                                                                                                                                                                                                        | Characteristics and BCTs of the control <sup>e</sup>                                                                                                                                                                                                                                                                     | Behaviour change theories, models or constructs mentioned |
|-------------------|----------------------------------------------------------------------------------------------------------------------------------------------------------------------------------------------------------------------------------------------------------------------------------------------------------------------------------------------------------------------------------------------------------------------------------------------------------------------------------------------|--------------------------------------------------------------------------------------------------------------------------------------------------------------------------------------------------------------------------------------------------------------------------------------------------------------------------------------------------------------------------------------------------------------------------------------------------------|--------------------------------------------------------------------------------------------------------------------------------------------------------------------------------------------------------------------------------------------------------------------------------------------------------------------------|-----------------------------------------------------------|
|                   | Tracker and/or app                                                                                                                                                                                                                                                                                                                                                                                                                                                                           | Other components of the intervention                                                                                                                                                                                                                                                                                                                                                                                                                   |                                                                                                                                                                                                                                                                                                                          |                                                           |
| Finkelstein, 2016 | <b>Arm: Fitbit tracker (without charity or cash incentives)</b>                                                                                                                                                                                                                                                                                                                                                                                                                              |                                                                                                                                                                                                                                                                                                                                                                                                                                                        | <b>Educational booklets</b><br>4.1 Instruction on how to perform the behaviour<br>5.1. Information about health consequences<br>9.1 Credible source<br><br>--<br>[4.1, 5.1 “benefits of and strategies for increasing physical activity”; 9.1 “educational booklets, published by the Singapore Health Promotion Board”] | Economic theory, Theory of reasoned action                |
|                   | <b>Fitbit zip tracker</b><br>2.2 Feedback on behaviour<br>2.3 Self-monitoring of behaviour<br>--<br>[2.2, 2.3 Fitbit]                                                                                                                                                                                                                                                                                                                                                                        | <b>Fitbit website + control group</b><br>1.1 Goal-setting (behaviour)<br>3.1 Social support<br>4.1 Instruction on how to perform the behaviour<br>5.1. Information about health consequences<br>6.2 Social comparison<br>9.1 Credible source<br>10.3 Non-specific reward<br>--<br>[1.1 “the website allows participants to set step goals for themselves”; 3. “Motivating messages”; 4.1, 5.1, 9.1 Same as control; 6.2 “Competitions”; 10.3 “Badges”] |                                                                                                                                                                                                                                                                                                                          |                                                           |
| Poirier, 2016     | <b>Tracker Pebble + (Fitlinxx Inc)</b><br>2.2 Feedback on behaviour<br>2.3 Self-monitoring of behaviour<br>--<br>[2.2, 2.3 “Follow their progress through their activity tracker”; the pebble display indicates progress towards daily goal; “Walkadoo is a freely available, open access, Internet-based program that pairs with a range of activity trackers to increase walking behavior. Activity trackers wirelessly and automatically send data to the program (or a smartphone app)"] | <b>Website with SNS (Walkadoo) + daily emails + SMS</b><br>1.1 Goal setting<br>2.2 Feedback on behaviour<br>3.1 Social support<br>6.2. Social comparison<br>7.1 Prompts/cues<br>8.7 Graded tasks<br>10.3 Non- specific reward<br>--<br>[1.1 “Participants receive daily steps goals”; 2.2 “Participants can opt to                                                                                                                                     | None<br>[Kept the tracker throughout the study but had no visual feedback or access to Walkadoo. Plus, they were “instructed not to wear their tracker”]                                                                                                                                                                 | “Principles of behavioural economics and operant shaping” |

| Author, year | Characteristics and BCTs of the intervention <sup>abcd</sup>                                                                                                                                                                                                   |                                                                                                                                                                                                                                                                                                                                                                                                                                                                                               | Characteristics and BCTs of the control <sup>e</sup>                                                                                                                                                                        | Behaviour change theories, models or constructs mentioned |
|--------------|----------------------------------------------------------------------------------------------------------------------------------------------------------------------------------------------------------------------------------------------------------------|-----------------------------------------------------------------------------------------------------------------------------------------------------------------------------------------------------------------------------------------------------------------------------------------------------------------------------------------------------------------------------------------------------------------------------------------------------------------------------------------------|-----------------------------------------------------------------------------------------------------------------------------------------------------------------------------------------------------------------------------|-----------------------------------------------------------|
|              | Tracker and/or app                                                                                                                                                                                                                                             | Other components of the intervention                                                                                                                                                                                                                                                                                                                                                                                                                                                          |                                                                                                                                                                                                                             |                                                           |
|              | throughout the day via sync points, or a Bluetooth connection and the Internet.”]                                                                                                                                                                              | receive up to 4 pre-scheduled SMSs per day: previous day's step count (...) and/or goal completion notification”; 3.1 “engaging socially with the community”; 6.2 “group competitions”; 7.1 “receive daily steps goals in the morning via email”; 8.7 “adaptive daily steps goals”; 10.3 “Participants receive virtual rewards (points, levels, and badges) for performing certain actions and reaching milestones”]                                                                          |                                                                                                                                                                                                                             |                                                           |
| Ashe, 2015   | <b>Fitbit One tracker + app</b><br>2.2 Feedback on the behaviour<br>2.3 Self-monitoring of the behaviour<br>--<br>[2.2 “immediate feedback on activities including daily step counts, distance walked, and stairs climbed.”; 2.3 “use of an activity monitor”] | <b>Group-based education and social support and individualized physical activity prescription (9 2-hour sessions) + public transportation tickets + Fitbit website</b><br>1.1 Goal setting behaviour<br>1.2 Problem solving<br>1.4 Action planning<br>1.5 Review behaviour goals<br>3. Social support<br>4.1 Instruction on how to perform the behaviour<br>5.1. Information about health consequences<br>6.2 Social comparison<br>8.7 Graded tasks<br>12.5 Adding objects to the environment | <b>Monthly health-related education sessions</b><br>4.1. Instruction on how to perform the behaviour<br>--<br>[4.1 “We provided control participants with separate monthly education sessions (...) [on] falls prevention”] | Social-ecological model and social cognitive theory       |



| Author, year         | Characteristics and BCTs of the intervention <sup>abcd</sup>                                                                                                 |                                                                                                                                                                                                                                                                                                                                                                                                                                                                                                                                                                                                                                                                                                                                             | Characteristics and BCTs of the control <sup>e</sup>                                                                                                                                                                                                    | Behaviour change theories, models or constructs mentioned  |
|----------------------|--------------------------------------------------------------------------------------------------------------------------------------------------------------|---------------------------------------------------------------------------------------------------------------------------------------------------------------------------------------------------------------------------------------------------------------------------------------------------------------------------------------------------------------------------------------------------------------------------------------------------------------------------------------------------------------------------------------------------------------------------------------------------------------------------------------------------------------------------------------------------------------------------------------------|---------------------------------------------------------------------------------------------------------------------------------------------------------------------------------------------------------------------------------------------------------|------------------------------------------------------------|
|                      | Tracker and/or app                                                                                                                                           | Other components of the intervention                                                                                                                                                                                                                                                                                                                                                                                                                                                                                                                                                                                                                                                                                                        |                                                                                                                                                                                                                                                         |                                                            |
|                      |                                                                                                                                                              | --<br>[1.1 “set activity goals”; 1.2 “dealing with setbacks”; 1.4 “discuss their progress to date, goals, and individual walking (step count) prescription”(…) “strategies to reduce sedentary behaviour”; 1.5 “Participants individually reviewed goals with exercise professionals at each session” ;3 “group-based education and social support”; 3, 6.2 “social networking and/or friendly competitions”; 4.1 “education topics included (...) gearing up for physical activity tips, tricks, and safety”; 5.1 “education topics included the following (...) the importance of exercise; 8.7 “increase their step counts by 5% at each visit”; 10.6 “given a booklet of 10 transit tickets to encourage use of public transportation”] |                                                                                                                                                                                                                                                         |                                                            |
| Cadmus-Bertram, 2015 | <b>Fitbit One tracker</b><br>2.2 Feedback on behaviour<br>2.3 Self-monitoring of behaviour<br>--<br>[2.2, 2.3 “summary data shown on the tracker’s display”] | <b>Fitbit website + instructional session</b><br>1.1 Goal setting<br>1.4 Action planning<br>1.5 Review behaviour goals<br>1.9 Commitment<br>--<br>[1.1 “Individualized goals were set for the first 4 weeks of the study”;                                                                                                                                                                                                                                                                                                                                                                                                                                                                                                                  | <b>Pedometer + printed materials</b><br>1.1. Goal setting (behaviour)<br>2.3. Self-monitoring of behaviour<br>4.1. Instruction on how to perform the behaviour<br>--<br>[1.1 “completed a brief goal-setting process...”; 2.3 “Standard pedometer”; 4.1 | Coventry, Aberdeen, and London—Refined (CALO-RE) framework |

| Author, year | Characteristics and BCTs of the intervention <sup>abcd</sup>                                                                                                                                                                                        |                                                                                                                                                                                                                                                                                                                                                                                                                                                                                                                                                                                                                                                                                                                                                                     | Characteristics and BCTs of the control <sup>e</sup>  | Behaviour change theories, models or constructs mentioned |
|--------------|-----------------------------------------------------------------------------------------------------------------------------------------------------------------------------------------------------------------------------------------------------|---------------------------------------------------------------------------------------------------------------------------------------------------------------------------------------------------------------------------------------------------------------------------------------------------------------------------------------------------------------------------------------------------------------------------------------------------------------------------------------------------------------------------------------------------------------------------------------------------------------------------------------------------------------------------------------------------------------------------------------------------------------------|-------------------------------------------------------|-----------------------------------------------------------|
|              | Tracker and/or app                                                                                                                                                                                                                                  | Other components of the intervention                                                                                                                                                                                                                                                                                                                                                                                                                                                                                                                                                                                                                                                                                                                                |                                                       |                                                           |
|              |                                                                                                                                                                                                                                                     | 1.5 “follow-up call at 4 weeks was used to evaluate progress and refine goals.”; 1.4 1.9 “participant committed to a specific plan”]                                                                                                                                                                                                                                                                                                                                                                                                                                                                                                                                                                                                                                | “printed materials with tips for increasing steps”]   |                                                           |
| Martin, 2015 | <b>Arm: tracker + SMS</b>                                                                                                                                                                                                                           |                                                                                                                                                                                                                                                                                                                                                                                                                                                                                                                                                                                                                                                                                                                                                                     | None<br>[Blinded tracker (measurement-purposes only)] | “Feedback loops and habit formation”                      |
|              | <b>Tracker + app (Fitbug)</b><br>2.2 Feedback on behaviour<br>2.3 Self-monitoring of behaviour<br>--<br>[2.2, 2.3 “Fitbug Orb, a wearable, display-free, triaxial accelerometer that pairs with low-energy Bluetooth with compatible smartphones.”] | <b>Website + SMS (3/day) + emails (baseline, day 3, then weekly)</b><br>1.1 Goal setting behaviour<br>4.1 Instruction on how to perform the behaviour<br>7.1. Prompts/cues<br>8.3. Habit formation<br>9.1. Credible source<br>10.3 Non-specific reward<br>--<br>[1.1 “goal of 10 000 steps/day”; 4.1 “practical tip that may help fit in more physical activity into one’s schedule”; 7.1 “booster messages, to motivate individuals when they were not tracking to surpass their step goal.”; 8.3 “content was written by the physician investigators and reflected behavioural change theories, particularly of feedback loops and habit formation”; 9.1 “texts aiming to leverage the physician-patient relationship, using the physician’s name in texts”; 10.3 |                                                       |                                                           |

| Author, year    | Characteristics and BCTs of the intervention <sup>abcd</sup>                                                                                                                                                                                                                                                                                    |                                                                                                                                                                                                                                                                        | Characteristics and BCTs of the control <sup>e</sup>                                                                                                                                                                                                                                                                                      | Behaviour change theories, models or constructs mentioned |
|-----------------|-------------------------------------------------------------------------------------------------------------------------------------------------------------------------------------------------------------------------------------------------------------------------------------------------------------------------------------------------|------------------------------------------------------------------------------------------------------------------------------------------------------------------------------------------------------------------------------------------------------------------------|-------------------------------------------------------------------------------------------------------------------------------------------------------------------------------------------------------------------------------------------------------------------------------------------------------------------------------------------|-----------------------------------------------------------|
|                 | Tracker and/or app                                                                                                                                                                                                                                                                                                                              | Other components of the intervention                                                                                                                                                                                                                                   |                                                                                                                                                                                                                                                                                                                                           |                                                           |
|                 |                                                                                                                                                                                                                                                                                                                                                 | "SMS sent when a participant (...) had already attained his or her goal"]                                                                                                                                                                                              |                                                                                                                                                                                                                                                                                                                                           |                                                           |
| Thorndike, 2014 | <b>Fitbit tracker</b><br>2.2 Feedback on behaviour<br>2.3 Self-monitoring of behaviour<br>10.3 Non-specific reward<br>--<br>[2.2, 2.3 "The monitor displayed steps, energy consumed, and distance travelled; 10.3 "displayed an activity "avatar" that would grow larger with increasing activity and smaller with more sedentary behaviour."}] | <b>Fitbit website + same as control</b><br>2.2 Feedback on behaviour<br>2.3 Self-monitoring of behaviour<br>7.1. Prompts/cues<br>8.1 Behavioural practice<br>12.5 Adding objects to the environment<br>--<br>[2.2, 2.3 Fitbit website; 7.1, 8.1, 12.5 Same as control] | (Blinded Fitbit) <b>Free access to fitness centre + 1-hour personal training session/week + 2 nutrition sessions + weekly emails</b><br>7.1. Prompts/cues<br>8.1 Behavioural practice<br>12.5 Adding objects to the environment<br>--<br>[7.1 Weekly emails; 8.1 "1-hour personal training session"; 12.5 free gym access, free sessions] | NR                                                        |
|                 |                                                                                                                                                                                                                                                                                                                                                 |                                                                                                                                                                                                                                                                        |                                                                                                                                                                                                                                                                                                                                           |                                                           |
| Patel, 2019     | <b>Competition arm</b>                                                                                                                                                                                                                                                                                                                          |                                                                                                                                                                                                                                                                        | <b>Tracker (Withings Activité Steel) + app + SMS/emails</b><br>1.1 Goal setting<br>2.2 Feedback on behaviour<br>2.3 Self-monitoring of behaviour<br>7.1 Prompts/cues<br>--<br>[1.1 "Each participant was informed of his or her baseline step count and then asked to choose a step goal increase";                                       | Prospect theory, behavioural economics                    |
|                 | <b>Tracker (Withings Activité Steel) + app</b><br>2.2 Feedback on behaviour<br>2.3 Self-monitoring of behaviour                                                                                                                                                                                                                                 | <b>SMS/emails + gamification</b><br>1.1 Goal setting<br>1.8 Behavioural contract<br>1.9 Commitment<br>5.5 Anticipated regret<br>6.2 Social comparison<br>7.1 Prompts/cues<br>7.5 Remove aversive stimulus<br>8.7 Graded tasks                                          |                                                                                                                                                                                                                                                                                                                                           |                                                           |

| Author, year | Characteristics and BCTs of the intervention <sup>abcd</sup> |                                                                                                                                                                                                                                                                                                                                                                                                                                                                                                                                                                                                                                                                                                                                                                                                                                                                                                                                                                                                                                                                                                                 | Characteristics and BCTs of the control <sup>e</sup>                                                                                     | Behaviour change theories, models or constructs mentioned |
|--------------|--------------------------------------------------------------|-----------------------------------------------------------------------------------------------------------------------------------------------------------------------------------------------------------------------------------------------------------------------------------------------------------------------------------------------------------------------------------------------------------------------------------------------------------------------------------------------------------------------------------------------------------------------------------------------------------------------------------------------------------------------------------------------------------------------------------------------------------------------------------------------------------------------------------------------------------------------------------------------------------------------------------------------------------------------------------------------------------------------------------------------------------------------------------------------------------------|------------------------------------------------------------------------------------------------------------------------------------------|-----------------------------------------------------------|
|              | Tracker and/or app                                           | Other components of the intervention                                                                                                                                                                                                                                                                                                                                                                                                                                                                                                                                                                                                                                                                                                                                                                                                                                                                                                                                                                                                                                                                            |                                                                                                                                          |                                                           |
|              |                                                              | <p>10.3 Non-specific reward<br/>10.6 Non-specific incentive<br/>10.11 Future punishment<br/>14.2 Punishment<br/>--</p> <p>[1.1, 7.1 Same as control; 1.8, 1.9 participants in the gamification arms signed a pre-commitment pledge to strive to achieve their step goal during the 36-week study"; 5.5, 10.11, 14.2 "every Monday the participant received 70 points (10 for each day of the week). If the participant did not achieve their step goal on the prior day, they lost 10 points from their balance"; 6.2 "participants received an email with a leaderboard that ranked them on their cumulative points in the study thus far and displayed their level. This feedback may have helped induce"; 7.5 "A new component was added to help reengage participants who were struggling to meet their goals at weeks 8 and 16 (defined as being in the blue or bronze levels of the game). These participants were sent an email that stated that they would get a fresh start by being reset to the silver level and offered the opportunity to readjust their goals among the initial options"; 8.7</p> | 2.2, 2.3 tracker + app; 7.1 "Each participant selected whether to receive regular study communications by email, text message, or both"] |                                                           |

| Author, year    | Characteristics and BCTs of the intervention <sup>abcd</sup>                                                                                                                            |                                                                                                                                                                                                                                                                                                                                                                                                                                                                                                                                                           | Characteristics and BCTs of the control <sup>e</sup>                                                                                                                                    | Behaviour change theories, models or constructs mentioned |
|-----------------|-----------------------------------------------------------------------------------------------------------------------------------------------------------------------------------------|-----------------------------------------------------------------------------------------------------------------------------------------------------------------------------------------------------------------------------------------------------------------------------------------------------------------------------------------------------------------------------------------------------------------------------------------------------------------------------------------------------------------------------------------------------------|-----------------------------------------------------------------------------------------------------------------------------------------------------------------------------------------|-----------------------------------------------------------|
|                 | Tracker and/or app                                                                                                                                                                      | Other components of the intervention                                                                                                                                                                                                                                                                                                                                                                                                                                                                                                                      |                                                                                                                                                                                         |                                                           |
|                 |                                                                                                                                                                                         | <p>"ramp-up period during the first 4 weeks in which daily step goal targets increased by 25% per week from baseline to the goal."; 10.3, 10.6 "entered into a game with points and levels that was run automatically (participants did not have to actively play the game, just strive for step goals) and provided a daily notification of their progress"; "participants could move up or down levels (from lowest to highest: blue, bronze, silver, gold, or platinum)", "Participants needed 40 points to advance a level"]</p>                      |                                                                                                                                                                                         |                                                           |
| Ellingson, 2019 | <p><b>Tracker + app (Fitbit Charge)</b><br/>           2.2 Feedback on behaviour<br/>           2.3 Self-monitoring of behaviour<br/>           --<br/>           [2.2, 2.3 Fitbit]</p> | <p><b>Coach-provided motivational interviewing and habit education (meetings + phone)</b><br/>           1.1 Goal setting<br/>           1.2 Problem solving<br/>           3 Social support<br/>           4.1 Instruction on how to perform the behaviour<br/>           7.1 Prompts/cues<br/>           8.3 Habit formation<br/>           --<br/>           [1.1, 8.3, 4.1 "discussed their self-determined goals regarding PA and principles of habit formation with a trained staff member"; 1.2 "discuss their perceived benefits and barriers</p> | <p><b>Tracker + app (Fitbit Charge)</b><br/>           2.2 Feedback on behaviour<br/>           2.3 Self-monitoring of behaviour<br/>           --<br/>           [2.2, 2.3 Fitbit]</p> | Motivational interviewing; habit formation                |

| Author, year | Characteristics and BCTs of the intervention <sup>abcd</sup>                                                                                                                                                                                                                                                                                                                                                                                                                                                                                                                                                                         |                                                                                                                                                                                                                                                                                                                                                                        | Characteristics and BCTs of the control <sup>e</sup>                                                                                                                                                                                                                                                                                                                                                                                                                                                                                             | Behaviour change theories, models or constructs mentioned |
|--------------|--------------------------------------------------------------------------------------------------------------------------------------------------------------------------------------------------------------------------------------------------------------------------------------------------------------------------------------------------------------------------------------------------------------------------------------------------------------------------------------------------------------------------------------------------------------------------------------------------------------------------------------|------------------------------------------------------------------------------------------------------------------------------------------------------------------------------------------------------------------------------------------------------------------------------------------------------------------------------------------------------------------------|--------------------------------------------------------------------------------------------------------------------------------------------------------------------------------------------------------------------------------------------------------------------------------------------------------------------------------------------------------------------------------------------------------------------------------------------------------------------------------------------------------------------------------------------------|-----------------------------------------------------------|
|              | Tracker and/or app                                                                                                                                                                                                                                                                                                                                                                                                                                                                                                                                                                                                                   | Other components of the intervention                                                                                                                                                                                                                                                                                                                                   |                                                                                                                                                                                                                                                                                                                                                                                                                                                                                                                                                  |                                                           |
|              |                                                                                                                                                                                                                                                                                                                                                                                                                                                                                                                                                                                                                                      | of becoming more physically active"; 3 "Motivational interviewing"; 7.1, 8.3 "brief definition of habits and their relevance for sustained behaviour change, followed by working with participants to determine salient cues to remember to wear their Fitbit and regularly check their data on the Fitbit itself and through the app at a time when PA was feasible"] |                                                                                                                                                                                                                                                                                                                                                                                                                                                                                                                                                  |                                                           |
| Zhang, 2019  | <b>Fitbit Zip tracker + PennFit app</b><br>2.2 Feedback on behaviour<br>2.3 Self-monitoring of behaviour<br>3.1 Social support (unspecified)<br>6.2 Social comparison<br>7.1 Prompts/cues<br>--<br>[2.2, 2.3 Same as control; 3.1 "An important feature designed to increase social support was the ability to send messages to their small group through an instant chatting tool."; 6.2 "use the PennFit app to see both their own profile and PA data and those of the three other women in their group"; 7.1 "system-generated notifications that reminded them to wear their Fitbit at 8am and to log their PA minutes at 9pm"] | None                                                                                                                                                                                                                                                                                                                                                                   | <b>Fitbit Zip tracker + PennFit app</b><br>2.2 Feedback on behaviour<br>2.3 Self-monitoring of behaviour<br>7.1 Prompts/cues<br>--<br>[2.2, 2.3 "All participants then received, to wear daily during the 3-month study period, a Fitbit Zip, a small, wireless activity-tracking device that measures active minutes and steps", "use the PennFit app to monitor their behaviors by tracking daily steps and light-intensity PA objectively collected from Fitbit's application program interface. To increase awareness of exercise effort, we | Social Cognitive Theory                                   |

| Author, year | Characteristics and BCTs of the intervention <sup>abcd</sup>                                                                                                                                                                         |                                                                                                                                                                                                                                                                                                                                                                                                                                                                                                                                                                                                     | Characteristics and BCTs of the control <sup>e</sup>                                                                                                                                                                                                                                                                                                         | Behaviour change theories, models or constructs mentioned |
|--------------|--------------------------------------------------------------------------------------------------------------------------------------------------------------------------------------------------------------------------------------|-----------------------------------------------------------------------------------------------------------------------------------------------------------------------------------------------------------------------------------------------------------------------------------------------------------------------------------------------------------------------------------------------------------------------------------------------------------------------------------------------------------------------------------------------------------------------------------------------------|--------------------------------------------------------------------------------------------------------------------------------------------------------------------------------------------------------------------------------------------------------------------------------------------------------------------------------------------------------------|-----------------------------------------------------------|
|              | Tracker and/or app                                                                                                                                                                                                                   | Other components of the intervention                                                                                                                                                                                                                                                                                                                                                                                                                                                                                                                                                                |                                                                                                                                                                                                                                                                                                                                                              |                                                           |
|              |                                                                                                                                                                                                                                      |                                                                                                                                                                                                                                                                                                                                                                                                                                                                                                                                                                                                     | encouraged participants to manually enter their exercise minutes for specific workouts involving moderate (e.g., walking briskly) or vigorous (e.g., jogging) aerobic PA or muscle-strengthening PA (e.g., push-ups); 7.1 Same as intervention]                                                                                                              |                                                           |
| Patel, 2018  | <b>Arm: Combined lottery incentives</b>                                                                                                                                                                                              |                                                                                                                                                                                                                                                                                                                                                                                                                                                                                                                                                                                                     | <b>App (Moves) + daily feedback on goal achievement (SMSs and/or emails)</b><br>1.1 Goal setting<br>2.2 Feedback on behaviour<br>2.3 Self-monitoring of behaviour<br>--<br>[2.2, 2.3 "For 26 weeks, all participants including those in the control group received daily feedback on whether or not they had achieved the 7000-step goal on the prior day."] | NR                                                        |
|              | <b>App (Moves)</b><br>2.2 Feedback on behaviour<br>2.3 Self-monitoring of behaviour<br>--<br>[2.2, 2.3 "Step counts were tracked using the Moves smartphone application (ProtoGeo Oy), which uses accelerometers within the phone."] | <b>Financial incentives + daily feedback on goal achievement (SMSs and/or emails)</b><br>1.1 Goal setting<br>2.2 Feedback on behaviour<br>5.5 Anticipated regret<br>10.1 Material incentive (behaviour)<br>10.2 Material reward (behaviour)<br>10.11 Future punishment<br>--<br>[1.1, 2.2 Same as control; 5.5, 10.11 "Participants who won the lottery but did not achieve their goal were informed what they would have won had they been adherent, drawing on research showing that the desire to avoid regret can be motivating."; 10.1 "In all 3 incentive arms, participants were informed of |                                                                                                                                                                                                                                                                                                                                                              |                                                           |

| Author, year   | Characteristics and BCTs of the intervention <sup>abcd</sup>                                                                                                                                   |                                                                                                                                                                                                                                                                                                                                                                                                                                                                                                                                                                                                                                                                                                                      | Characteristics and BCTs of the control <sup>e</sup>                                                                                                                                                                                       | Behaviour change theories, models or constructs mentioned |
|----------------|------------------------------------------------------------------------------------------------------------------------------------------------------------------------------------------------|----------------------------------------------------------------------------------------------------------------------------------------------------------------------------------------------------------------------------------------------------------------------------------------------------------------------------------------------------------------------------------------------------------------------------------------------------------------------------------------------------------------------------------------------------------------------------------------------------------------------------------------------------------------------------------------------------------------------|--------------------------------------------------------------------------------------------------------------------------------------------------------------------------------------------------------------------------------------------|-----------------------------------------------------------|
|                | Tracker and/or app                                                                                                                                                                             | Other components of the intervention                                                                                                                                                                                                                                                                                                                                                                                                                                                                                                                                                                                                                                                                                 |                                                                                                                                                                                                                                            |                                                           |
|                |                                                                                                                                                                                                | these amounts and probabilities at the beginning of the trial.”; 10.2 “In the “combined” incentive arm, each participant had both an 18% chance (approximately 1 in 5 chance) of winning \$5 and a 1% chance of winning \$50.”]                                                                                                                                                                                                                                                                                                                                                                                                                                                                                      |                                                                                                                                                                                                                                            |                                                           |
| Robinson, 2018 | <b>Tracker (Fitbit Zip)</b><br>2.2 Feedback on behaviour<br>2.3 Self-monitoring of behaviour<br>--<br>[2.2, 2.3 “Participants received a pedometer (Fitbit) to objectively measure activity.”] | <b>Daily emails (+ incentive reminders) + online resources</b><br>1.1 Goal setting (behaviour)<br>1.2 Problem solving<br>1.4 Action planning<br>2.2 Feedback on behaviour<br>4.1 Instruction on how to perform the behaviour<br>7.1 Prompts/cues<br>8.3 Habit formation<br>8.7 Graded tasks<br>11.2 Reduce negative emotions<br>13.2 Framing/reframing<br>--<br>[1.1 “Participants were given a goal to increase the number of daily steps each week”; 1.2 “manage time-related barriers to exercise”; 1.4 “Implementation intentions were formed by specifying the when, where, and how they would add steps to their day. Specifically, after the baseline week, for 4 weeks, participants specified the ‘when’ by | <b>Tracker (Fitbit Zip) + Daily emails</b><br>2.2 Feedback on behaviour<br>2.3 Self-monitoring of behaviour<br>7.1 Prompts/cues<br>--<br>[2.2, 2.3 “Number of steps were recorded daily.”; 7.1 daily emails: “request to wear the fitbit”] | Implementation intentions                                 |



| Author, year | Characteristics and BCTs of the intervention <sup>abcd</sup> |                                                                                                                                                                                                                                                                                                                                                                                                                                                                                                                                                                                                                                                                                                                                                                                                                                                                                                                                                                                                                                                                                             | Characteristics and BCTs of the control <sup>e</sup> | Behaviour change theories, models or constructs mentioned |
|--------------|--------------------------------------------------------------|---------------------------------------------------------------------------------------------------------------------------------------------------------------------------------------------------------------------------------------------------------------------------------------------------------------------------------------------------------------------------------------------------------------------------------------------------------------------------------------------------------------------------------------------------------------------------------------------------------------------------------------------------------------------------------------------------------------------------------------------------------------------------------------------------------------------------------------------------------------------------------------------------------------------------------------------------------------------------------------------------------------------------------------------------------------------------------------------|------------------------------------------------------|-----------------------------------------------------------|
|              | Tracker and/or app                                           | Other components of the intervention                                                                                                                                                                                                                                                                                                                                                                                                                                                                                                                                                                                                                                                                                                                                                                                                                                                                                                                                                                                                                                                        |                                                      |                                                           |
|              |                                                              | identifying time in their schedule that they could add steps and were asked to estimate approximately how many steps they would walk during each time point. The intervention condition was prompted with an email each evening to review their schedules for the following day and identify time slots where they could add activity. They were given instructions for providing a detailed calendar of appointments and open slots for the next day using a simple daily planner. To specify the 'where' of the implementation intention, participants were given customised maps near their home and work with specific information about distances, estimated time to walk between different points, and estimated number of steps based on the participants' walking pace for specific routes to help them in planning. To help with the 'how' component of the implementation intentions, participants in the intervention condition were given a list of strategies they could use to augment their step counts throughout the day.”; 2.2 “Number of steps and goal achievement were |                                                      |                                                           |

| Author, year  | Characteristics and BCTs of the intervention <sup>abcd</sup>                                                                                                                                                                                                                                                                                                               |                                                                                                                                                                                                                                                                                                                                                                                                                                                                                                                                       | Characteristics and BCTs of the control <sup>e</sup>                                                                                                                                                                                                                                                                                                                                       | Behaviour change theories, models or constructs mentioned |
|---------------|----------------------------------------------------------------------------------------------------------------------------------------------------------------------------------------------------------------------------------------------------------------------------------------------------------------------------------------------------------------------------|---------------------------------------------------------------------------------------------------------------------------------------------------------------------------------------------------------------------------------------------------------------------------------------------------------------------------------------------------------------------------------------------------------------------------------------------------------------------------------------------------------------------------------------|--------------------------------------------------------------------------------------------------------------------------------------------------------------------------------------------------------------------------------------------------------------------------------------------------------------------------------------------------------------------------------------------|-----------------------------------------------------------|
|               | Tracker and/or app                                                                                                                                                                                                                                                                                                                                                         | Other components of the intervention                                                                                                                                                                                                                                                                                                                                                                                                                                                                                                  |                                                                                                                                                                                                                                                                                                                                                                                            |                                                           |
|               |                                                                                                                                                                                                                                                                                                                                                                            | recorded daily.”; 4.1 Supplement “Other ways to increase steps”; 7.1 same as control; 8.3 “Implementation intentions are utilised to establish habits – the specific habit for this study was the habit of identifying opportunities within a daily schedule to increase steps”; 8.7 “increments of 2,000 steps each week”; 11.2 “using cognitive restructuring to combat general worries and perceived barriers to exercising”; 13.2 “using cognitive restructuring to combat general worries and perceived barriers to exercising”] |                                                                                                                                                                                                                                                                                                                                                                                            |                                                           |
| Fanning, 2017 | <b>Arm: group A</b>                                                                                                                                                                                                                                                                                                                                                        |                                                                                                                                                                                                                                                                                                                                                                                                                                                                                                                                       | <b>App (without goal setting) + orientation session + weekly emails + weekly SMS + resources + printed workbook to record goals</b><br>1.1 Goal setting (behaviour)<br>1.5 Review behaviour goals<br>2.2 Feedback on behaviour<br>2.3 Self-monitoring of behaviour<br>4.1 Instruction on how to perform the behaviour<br>7.1 Prompts/cues<br>8.7 Graded tasks<br>9.1 Credible source<br>-- | Social Cognitive Theory                                   |
|               | <b>App + goal setting and point-based feedback features (group A)</b><br>1.1 Goal setting (behaviour)<br>1.5 Review behaviour goal(s)<br>1.6 Discrepancy between current behaviour and goal<br>2.2 Feedback on behaviour<br>2.3 Self-monitoring of behaviour<br>4.1 Instruction on how to perform the behaviour<br>10.3 Non-specific reward<br>10.6 Non-specific incentive | <b>Orientation session + weekly emails + weekly SMS + resources</b><br>1.1 Goal setting (behaviour)<br>1.5 Review behaviour goals<br>2.2 Feedback on behaviour<br>7.1 Prompts/cues<br>8.7 Graded tasks<br>9.1 Credible source<br>10.3 Non-specific reward<br>--<br>[1.1, 1.5, 2.2, 7.1, 8.7, 9.1, 10.3 Same as control]                                                                                                                                                                                                               |                                                                                                                                                                                                                                                                                                                                                                                            |                                                           |

| Author, year | Characteristics and BCTs of the intervention <sup>abcd</sup>                                                                                                                                                                                                                                                                                                                                                                                                                                                                                        |                                      | Characteristics and BCTs of the control <sup>e</sup>                                                                                                                                                                                                                                                                                                                                                                                                                                                                                                                                                                                                                                                                                                                                                                                                                                                                                                                                                      | Behaviour change theories, models or constructs mentioned |
|--------------|-----------------------------------------------------------------------------------------------------------------------------------------------------------------------------------------------------------------------------------------------------------------------------------------------------------------------------------------------------------------------------------------------------------------------------------------------------------------------------------------------------------------------------------------------------|--------------------------------------|-----------------------------------------------------------------------------------------------------------------------------------------------------------------------------------------------------------------------------------------------------------------------------------------------------------------------------------------------------------------------------------------------------------------------------------------------------------------------------------------------------------------------------------------------------------------------------------------------------------------------------------------------------------------------------------------------------------------------------------------------------------------------------------------------------------------------------------------------------------------------------------------------------------------------------------------------------------------------------------------------------------|-----------------------------------------------------------|
|              | Tracker and/or app                                                                                                                                                                                                                                                                                                                                                                                                                                                                                                                                  | Other components of the intervention |                                                                                                                                                                                                                                                                                                                                                                                                                                                                                                                                                                                                                                                                                                                                                                                                                                                                                                                                                                                                           |                                                           |
|              | --<br>[1.1 “goal setting module within the app”; 2.2, 2.3, 4.1 Same as control; 1.5, “Goal recommendations emphasized revision or progression as appropriate”; 1.6 “module displayed participant goal progress”; 8.7 “progression toward public health recommendations for PA over the course of the 12-week intervention.”; 10.3, 10.6 “points-based feedback module. This module was intended as a novel tool for delivering instant SCT feedback and incremental rewards, and did so using a system of “program points”, “levels” and “badges”.] |                                      | [1.1 “During the program orientation, staff provided all participants with counseling on a goal setting process; 1.5, 2.2 “Emails contained an opening paragraph that was tailored by position within the program, weekly educational content, and progress toward the previous weekly goal”; 2.2, 2.3 “All individuals received access to a base-level app containing four features (i.e., tracking, instant feedback, biweekly feedback, knowledge); 4.1 “Weekly educational modules covered central topics in social cognitive theory and health behaviour change”; 7.1 “Thursday text-messages provided a brief motivational quote and summary information for those who had tracked activity in the week, and a reminder to be active for those who had not”; 8.7 “Participant goals urged progression toward public health recommendations for PA over the course of the 12-week intervention”; 9.1 “several reputable exercise resources (e.g., the American Council on Exercise Activity Library; |                                                           |

| Author, year | Characteristics and BCTs of the intervention <sup>abcd</sup>                                                                                     |                                                                                                                                                                                                                                                                                                                                                                                                                                                                                                                                                                                                                                                                                                                                                                                                                                                                        | Characteristics and BCTs of the control <sup>e</sup>                                                                                                                                                                                                                                                                                                                                                                                                                                                | Behaviour change theories, models or constructs mentioned |
|--------------|--------------------------------------------------------------------------------------------------------------------------------------------------|------------------------------------------------------------------------------------------------------------------------------------------------------------------------------------------------------------------------------------------------------------------------------------------------------------------------------------------------------------------------------------------------------------------------------------------------------------------------------------------------------------------------------------------------------------------------------------------------------------------------------------------------------------------------------------------------------------------------------------------------------------------------------------------------------------------------------------------------------------------------|-----------------------------------------------------------------------------------------------------------------------------------------------------------------------------------------------------------------------------------------------------------------------------------------------------------------------------------------------------------------------------------------------------------------------------------------------------------------------------------------------------|-----------------------------------------------------------|
|              | Tracker and/or app                                                                                                                               | Other components of the intervention                                                                                                                                                                                                                                                                                                                                                                                                                                                                                                                                                                                                                                                                                                                                                                                                                                   |                                                                                                                                                                                                                                                                                                                                                                                                                                                                                                     |                                                           |
|              |                                                                                                                                                  |                                                                                                                                                                                                                                                                                                                                                                                                                                                                                                                                                                                                                                                                                                                                                                                                                                                                        | American Council on Exercise) to facilitate ongoing goal setting.”]                                                                                                                                                                                                                                                                                                                                                                                                                                 |                                                           |
| Patel, 2017  | <b>App (Moves) OR tracker (Fitbit Flex)</b><br>2.2 Feedback on behaviour<br>2.3 Self-monitoring of behaviour<br>--<br>[2.2, 2.3 Same as control] | <b>SMSs and/or emails</b><br>1.1 Goal setting<br>1.8 Behavioural contract<br>1.9 Commitment<br>2.2 Feedback on behaviour<br>3.1 Social support<br>5.5 Anticipated regret<br>8.7 Graded tasks<br>10.1 Material incentive (behaviour)<br>10.2 Material reward (behaviour)<br>10.3 Non-specific reward<br>10.6 Non-specific incentive<br>10.11 Future punishment<br>--<br>[1.1 “After randomization but before participants learned of study arm assignment, each participant was informed of his or her baseline step count and was asked to select a step goal increase of 33%, 40%, or 50% or any goal at least 1000 steps greater than baseline.”; 1.8, 1.9 “Participants electronically signed a commitment pledge to try their best to achieve their step goal.”; 2.2 Same as control; 3.1 “seek help from a family member”; 8.7 “achievable goal gradients”; 10.1, | <b>App (Moves) OR tracker (Fitbit Flex) + SMSs and/or emails</b><br>1.1 Goal setting<br>2.2 Feedback on behaviour<br>2.3 Self-monitoring of behaviour<br>--<br>[2.2 “All participants (including those in the control arm) receive daily feedback on whether or not they had achieved their step goal on the prior day.”; 2.3 “Eligible participants either downloaded a smartphone application (Moves or Fitbit) or were mailed a wrist-worn wearable device (Fitbit Flex) to track step counts.”] | Behavioural economics                                     |

| Author, year | Characteristics and BCTs of the intervention <sup>abcd</sup>                                                                                                                                                                                                                                                                                                                                                                |                                                                                                                                                                                                                                                                                                                                                                                                                                                                                                                                           | Characteristics and BCTs of the control <sup>e</sup>                                                                                                                                                                                                                                                                                                                                                        | Behaviour change theories, models or constructs mentioned |
|--------------|-----------------------------------------------------------------------------------------------------------------------------------------------------------------------------------------------------------------------------------------------------------------------------------------------------------------------------------------------------------------------------------------------------------------------------|-------------------------------------------------------------------------------------------------------------------------------------------------------------------------------------------------------------------------------------------------------------------------------------------------------------------------------------------------------------------------------------------------------------------------------------------------------------------------------------------------------------------------------------------|-------------------------------------------------------------------------------------------------------------------------------------------------------------------------------------------------------------------------------------------------------------------------------------------------------------------------------------------------------------------------------------------------------------|-----------------------------------------------------------|
|              | Tracker and/or app                                                                                                                                                                                                                                                                                                                                                                                                          | Other components of the intervention                                                                                                                                                                                                                                                                                                                                                                                                                                                                                                      |                                                                                                                                                                                                                                                                                                                                                                                                             |                                                           |
|              |                                                                                                                                                                                                                                                                                                                                                                                                                             | 10.2 “families were informed that if they finished the intervention period at the gold or platinum level they each would receive a coffee mug with the study logo as a reward.”; 5.5, 10.3, 10.6, 10.11 “every Monday, the family was endowed with 70 points (10 for each day of the upcoming week). Each day, the family was informed of the one member who was selected at random to represent their team. If that member achieved his or her step goal on the prior day, the family kept its points; otherwise, 10 points were lost.”] |                                                                                                                                                                                                                                                                                                                                                                                                             |                                                           |
| John, 2016   | <b>App (AchieveMint) + Tracker (Fitbit)</b><br>2.2 Feedback on behaviour<br>2.3 Self-monitoring of behaviour<br>10.1 Material incentive (behaviour)<br>--<br>[2.2 Fitbit; 2.3 app that tracks pedometer use.”<br>10.1 “Every time an AchieveMint user takes 200 steps, he or she earns one point from the platform. Points are redeemable for cash rewards: after a user has taken 200,000 steps, he or she earns \$1.00.”] | <b>Emails + monetary reward</b><br>7.1 Prompts/cues<br>7.2 Cue signalling reward<br>10.2 Material reward (behaviour)<br>--<br>[7.1 same as control; 7.2 “Users in the “salient” incentives condition received extra emails containing information about offered incentives.”; 10.1 “Users receive a check for every \$25 earned.”]                                                                                                                                                                                                        | <b>App (AchieveMint) + Tracker (Fitbit) + monetary reward + emails</b><br>2.2 Feedback on behaviour<br>2.3 Self-monitoring of behaviour<br>7.1 Prompts/cues<br>10.1 Material incentive (behaviour)<br>10.2 Material reward (behaviour)<br>--<br>[2.2 2.3 “The experiment’s participants were users of an app that tracks pedometer use.”; 7.1 “All participants were able to track their AchieveMint points | Incentive salience                                        |

| Author, year | Characteristics and BCTs of the intervention <sup>abcd</sup>                                                                                                                                                                                                                                                                                                                                                                                                                                                                  |                                      | Characteristics and BCTs of the control <sup>e</sup>                                                                                                                                                                                                                                                                                                    | Behaviour change theories, models or constructs mentioned |
|--------------|-------------------------------------------------------------------------------------------------------------------------------------------------------------------------------------------------------------------------------------------------------------------------------------------------------------------------------------------------------------------------------------------------------------------------------------------------------------------------------------------------------------------------------|--------------------------------------|---------------------------------------------------------------------------------------------------------------------------------------------------------------------------------------------------------------------------------------------------------------------------------------------------------------------------------------------------------|-----------------------------------------------------------|
|              | Tracker and/or app                                                                                                                                                                                                                                                                                                                                                                                                                                                                                                            | Other components of the intervention |                                                                                                                                                                                                                                                                                                                                                         |                                                           |
|              |                                                                                                                                                                                                                                                                                                                                                                                                                                                                                                                               |                                      | through the AchieveMint app, website, and through standard weekly update emails"; 10.1, 10.2 "Every time an AchieveMint user takes 200 steps, he or she earns one point from the platform. Points are redeemable for cash rewards: after a user has taken 200,000 steps, he or she earns \$1.00."; 10.2 "Users receive a check for every \$25 earned."] |                                                           |
| King, 2016   | <b>Arm: socially-framed app</b>                                                                                                                                                                                                                                                                                                                                                                                                                                                                                               |                                      | <b>Dietary app (Calorific)</b><br>--<br>["app that tracks dietary behaviours"]                                                                                                                                                                                                                                                                          | Social Cognitive theory and social influence theory       |
|              | <b>Social app</b><br>1.2 Problem solving<br>2.2 Feedback on behaviour<br>2.3 Self-monitoring of behaviour<br>3.1 Social support<br>4.1 Instruction on how to perform the behaviour<br>6.2. Social comparison<br>7.1. Prompts/cues<br>--<br>[1.2 "problem solving strategies"; 2.2, 2.3 "real-time customized feedback that was driven by the personal data being captured via the built-in accelerometer"; 6.2 "social normative feedback", current physical activity/sedentary behaviour levels of the participant and other | None                                 |                                                                                                                                                                                                                                                                                                                                                         |                                                           |

| Author, year  | Characteristics and BCTs of the intervention <sup>abcd</sup>                                                                                                                                                                                                                           |                                                                                                                                                                                                                                                                                                                                                                                                               | Characteristics and BCTs of the control <sup>e</sup>                                                                                                                                                                                                                                                                                                                                                                                                                     | Behaviour change theories, models or constructs mentioned |
|---------------|----------------------------------------------------------------------------------------------------------------------------------------------------------------------------------------------------------------------------------------------------------------------------------------|---------------------------------------------------------------------------------------------------------------------------------------------------------------------------------------------------------------------------------------------------------------------------------------------------------------------------------------------------------------------------------------------------------------|--------------------------------------------------------------------------------------------------------------------------------------------------------------------------------------------------------------------------------------------------------------------------------------------------------------------------------------------------------------------------------------------------------------------------------------------------------------------------|-----------------------------------------------------------|
|               | Tracker and/or app                                                                                                                                                                                                                                                                     | Other components of the intervention                                                                                                                                                                                                                                                                                                                                                                          |                                                                                                                                                                                                                                                                                                                                                                                                                                                                          |                                                           |
|               | members of the “virtual team” to which he/she had been automatically assigned”; 3.1 “online message board”; 4.1 “information tips”; 7.1 “push” (notifications)]                                                                                                                        |                                                                                                                                                                                                                                                                                                                                                                                                               |                                                                                                                                                                                                                                                                                                                                                                                                                                                                          |                                                           |
| Melton, 2016  | <b>Tracker + app (Jawbone)</b><br>2.2 Feedback on behaviour<br>2.3 Self-monitoring of behaviour<br>--<br>[2.2 “accelerometer that links with a smartphone application and is able to provide participants feedback about physical activity”]                                           | <b>Weekly emails</b><br>7.1. Prompts/cues<br>--<br>[7.1 “Weekly email reminders were sent with general health tips, reminders to use the band and application”]                                                                                                                                                                                                                                               | <b>MyFitnessPal app + weekly emails</b><br>2.2 Feedback on behaviour<br>2.3 Self-monitoring of behaviour<br>7.1. Prompts/cues<br>--<br>[2.3 “tracking”; 7.1. Prompts/cues: “same schedule of weekly email reminders”]                                                                                                                                                                                                                                                    | NR                                                        |
| Patel, 2016 I | <b>Arm: combined incentive</b>                                                                                                                                                                                                                                                         |                                                                                                                                                                                                                                                                                                                                                                                                               | <b>App (Moves) + SMS / email / automated voice call</b><br>1.1 Goal setting behaviour<br>2.2 Feedback on behaviour<br>2.3 Self-monitoring of behaviour<br>--<br>[1.1 “goal of at least 7000 steps”; 2.2 “Participants in all arms received daily individual performance feedback for 26 weeks on whether the goal of at least 7000 steps was achieved on the prior day (...) “choose whether to receive this feedback by email, text message, or automated voice call.”] | NR                                                        |
|               | <b>App (Moves)</b><br>2.2 Feedback on behaviour<br>2.3 Self-monitoring of behaviour<br>--<br>[2.3 “Once the application was installed on their phones, participants were not required to ever re-open the application, although they could as often as they wished” (same as control)] | <b>Daily SMS / email / automated voice call + Individual incentives + team incentives</b><br>1.1 Goal setting behaviour<br>2.2 Feedback on behaviour<br>6.2. Social comparison<br>10.1 Material incentive (behaviour)<br>10.2 Material reward (behaviour)<br>10.4 Social reward<br>10.5 Social incentive<br>--<br>[1.1, 2.2 Same as control; 6.2 “participants received weekly feedback on team performance”; |                                                                                                                                                                                                                                                                                                                                                                                                                                                                          |                                                           |

| Author, year   | Characteristics and BCTs of the intervention <sup>abcd</sup>                                                                               |                                                                                                                                                                                                                                                                                                                                                                             | Characteristics and BCTs of the control <sup>e</sup>                                                                                                                                                                                                                | Behaviour change theories, models or constructs mentioned |
|----------------|--------------------------------------------------------------------------------------------------------------------------------------------|-----------------------------------------------------------------------------------------------------------------------------------------------------------------------------------------------------------------------------------------------------------------------------------------------------------------------------------------------------------------------------|---------------------------------------------------------------------------------------------------------------------------------------------------------------------------------------------------------------------------------------------------------------------|-----------------------------------------------------------|
|                | Tracker and/or app                                                                                                                         | Other components of the intervention                                                                                                                                                                                                                                                                                                                                        |                                                                                                                                                                                                                                                                     |                                                           |
|                |                                                                                                                                            | 10.1, 10.2 Each person on the chosen team (randomly picked every other day) could collect \$20 if he or she had at least 7000 steps on the prior day; 10.5, 10.6 "additional \$10 for each team member who also had at least 7000 steps on the prior day"]                                                                                                                  |                                                                                                                                                                                                                                                                     |                                                           |
| Patel, 2016 II | <b>Arm: Weekly feedback on team performance compared to the 75th percentile (no incentive)</b>                                             |                                                                                                                                                                                                                                                                                                                                                                             | <b>App (Moves) + weekly feedback on team performance compared to the 50th percentile (email and/or SMS)</b><br>1.1 Goal setting (behaviour)<br>2.2 Feedback on behaviour<br>2.3 Self-monitoring of behaviour<br>--<br>[2.2, 2.3 Moves application, same as control] | NR                                                        |
|                | <b>App (Moves)</b><br>2.2 Feedback on behaviour<br>2.3 Self-monitoring of behaviour<br>--<br>[2.2, 2.3 Moves application, same as control] | <b>Weekly feedback on team performance compared to the 75th percentile (email and/or SMS)</b><br>1.1 Goal setting (behaviour)<br>2.2 Feedback on behaviour<br>6.2. Social comparison<br>--<br>[1.1 Same as control; 2.2 all participants received "daily individual performance feedback"; 6.2 "told how their performance compared to the 75th percentile (top quartile)"] |                                                                                                                                                                                                                                                                     |                                                           |
| Walsh, 2016    | <b>App (Accupedo-Pro Pedometer app) with widget (home screen)</b><br>1.6 Discrepancy between current behaviour and goal                    | <b>Face-to-face session + educational content + goal-setting</b><br>1.1 Goal setting                                                                                                                                                                                                                                                                                        | <b>App (Accupedo-Pro Pedometer app) without widget + face-to-face session + educational content + goal-</b>                                                                                                                                                         | COM-B model, Behaviour Change Wheel                       |



| Author, year  | Characteristics and BCTs of the intervention <sup>abcd</sup>                                                                                                                                                                                                                                                      |                                                                                                                                                                                                                                                                           | Characteristics and BCTs of the control <sup>e</sup>                                                                                                                                                                                                                                                                                                                                                                                                                                                                       | Behaviour change theories, models or constructs mentioned |
|---------------|-------------------------------------------------------------------------------------------------------------------------------------------------------------------------------------------------------------------------------------------------------------------------------------------------------------------|---------------------------------------------------------------------------------------------------------------------------------------------------------------------------------------------------------------------------------------------------------------------------|----------------------------------------------------------------------------------------------------------------------------------------------------------------------------------------------------------------------------------------------------------------------------------------------------------------------------------------------------------------------------------------------------------------------------------------------------------------------------------------------------------------------------|-----------------------------------------------------------|
|               | Tracker and/or app                                                                                                                                                                                                                                                                                                | Other components of the intervention                                                                                                                                                                                                                                      |                                                                                                                                                                                                                                                                                                                                                                                                                                                                                                                            |                                                           |
|               | 2.2 Feedback on behaviour<br>2.3 Self-monitoring of behaviour<br>7.1 Prompts/cues<br>--<br>[1.6, 2.2, 2.3 “encouraged this group to use the app to monitor their steps and obtain feedback, in order to achieve their target goals.”; 7.1 app widget]                                                             | 4.1 Instruction on how to perform the behaviour<br>5.1 Information about health consequences<br>6.1 Demonstration of the behaviour<br>--<br>[1.1, 4.1, 5.1, 6.1 Same as control]                                                                                          | <b>setting</b><br>1.1 Goal setting<br>2.2 Feedback on behaviour<br>2.3 Self-monitoring of behaviour<br>4.1 Instruction on how to perform the behaviour<br>5.1 Information about health consequences<br>6.1 Demonstration of the behaviour<br>--<br>[1.1 “given a goal of 30 minutes of walking per day over the following month”; 4.1 “Information related to daily recommended PA levels (ie, 30 minutes daily”); 5.1 “information highlighting the benefits of walking regularly”; 6.1 “Demonstration of the behaviour”] |                                                           |
| Cowdery, 2015 | <b>Exergame app + MOVES app</b><br>2.2 Feedback on behaviour<br>2.3 Self-monitoring of behaviour<br>10.3 Non-specific reward<br>10.6 Non-specific incentive<br>12.4 Distraction<br>--<br>[2.2, 2.3. MOVES app; 10.3, 10.6 “collect supplies and avoid being attacked by Zombies as they exercise”; 12.4 exergame] | <b>Weekly motivational emails</b><br>3.1 Social support<br>4.1 Instruction on how to perform the behaviour<br>7.1 Prompts/cues<br>--<br>[3.1, 7.1 “Participants in the intervention group also received weekly motivational emails”; 4.1 “Guidelines (...) recommend that | <b>MOVES app (for passive data collection)</b><br>2.2 Feedback on behaviour<br>2.3 Self-monitoring of behaviour                                                                                                                                                                                                                                                                                                                                                                                                            | Self-determination theory                                 |

| Author, year | Characteristics and BCTs of the intervention <sup>abcd</sup>                                                                                                                                               |                                                                                                                                                                                                                                                                                    | Characteristics and BCTs of the control <sup>e</sup>                                                                                                                                                                                                                                                                                                                                                                                                                             | Behaviour change theories, models or constructs mentioned |
|--------------|------------------------------------------------------------------------------------------------------------------------------------------------------------------------------------------------------------|------------------------------------------------------------------------------------------------------------------------------------------------------------------------------------------------------------------------------------------------------------------------------------|----------------------------------------------------------------------------------------------------------------------------------------------------------------------------------------------------------------------------------------------------------------------------------------------------------------------------------------------------------------------------------------------------------------------------------------------------------------------------------|-----------------------------------------------------------|
|              | Tracker and/or app                                                                                                                                                                                         | Other components of the intervention                                                                                                                                                                                                                                               |                                                                                                                                                                                                                                                                                                                                                                                                                                                                                  |                                                           |
|              |                                                                                                                                                                                                            | adults get at least 150 minutes per week of moderate intensity activity"]                                                                                                                                                                                                          |                                                                                                                                                                                                                                                                                                                                                                                                                                                                                  |                                                           |
| Wang, 2015   | <b>Tracker (Fitbit One) +/- Fitbit app</b><br>2.2 Feedback on behaviour<br>2.3 Self-monitoring of behaviour<br>--<br>[2.2, 2.3 Fitbit]                                                                     | <b>SMSs (3/day) + Fitbit website + educational session</b><br>1.1 Goal setting (behaviour)<br>1.2 Problem solving<br>7.1 Prompts/cues<br>--<br>[1.1, 1.2 Same as control; 7.1 "three daily SMS-based physical activity prompts"]                                                   | <b>Tracker (Fitbit One) + Fitbit app and/or website + educational session</b><br>1.1 Goal setting (behaviour)<br>1.2 Problem solving<br>2.2 Feedback on behaviour<br>2.3 Self-monitoring of behaviour<br>--<br>[1.1, 1.2 "To set the physical activity agenda for all participants, study personnel provided participants with a brief 5-min intervention to review motivation, set goals (i.e., toward 10,000 steps/day), and plan for challenging situations; 2.2, 2.3 Fitbit] | NR                                                        |
| Glynn, 2014  | <b>App (Accupedo-Pro Pedometer app) with widget (home screen)</b><br>2.2 Feedback on behaviour<br>2.3 Self-monitoring of behaviour<br>7.1 Prompts/cues<br>--<br>[2.2, 2.3 Same as control; 7.1 app widget] | <b>Leaflet + SMS (weeks 1, 2 and 8) + phone call (week 1 session)</b><br>1.1 Goal-setting<br>4.1 Instruction on how to perform the behaviour<br>5.1 Information about health consequences<br>7.1 Prompts/cues<br>9.1 Credible source<br>--<br>[1.1 "given a physical activity goal | <b>Blinded app (Accupedo-Pro Pedometer app) without widget + leaflet + SMS (weeks 1, 2 and 8) + phone call (week 1 session)</b><br>1.1 Goal-setting<br>2.2 Feedback on behaviour<br>2.3 Self-monitoring of behaviour<br>4.1. Instruction on how to perform the behaviour<br>5.1 Information about health                                                                                                                                                                         | NR                                                        |

| Author, year | Characteristics and BCTs of the intervention <sup>abcd</sup> |                                                               | Characteristics and BCTs of the control <sup>e</sup>                                                                                                                                                                                                                                                                                        | Behaviour change theories, models or constructs mentioned |
|--------------|--------------------------------------------------------------|---------------------------------------------------------------|---------------------------------------------------------------------------------------------------------------------------------------------------------------------------------------------------------------------------------------------------------------------------------------------------------------------------------------------|-----------------------------------------------------------|
|              | Tracker and/or app                                           | Other components of the intervention                          |                                                                                                                                                                                                                                                                                                                                             |                                                           |
|              |                                                              | of 10 000 steps per day"; 4.1, 5.1, 7.1, 9.1 same as control] | consequences<br>7.1 Prompts/cues<br>9.1 Credible source<br>--<br>[1.1 "given similar physical activity goals"; 2.2, 2.3 "automatic feedback and tracking of step count and calories burnt"; 4.1, 9.1 "issued with the Irish Heart Foundation Be Active physical activity promotion brochure" 5.1 "information on the benefits of exercise"] |                                                           |

<sup>a</sup>Interventions involving Fitbit, Jawbone and Polar were considered to include tracker + app components given the app's availability for download from any app store (these companies sometimes have an associated website similar to the mobile apps—we refer only to the apps in this table); <sup>b</sup>In studies with more than 2 arms, only the control and intervention of interest are described, selected as per defined in the methods; <sup>c</sup>The classification of BCTs was based on the information provided in the main manuscript, existing protocol papers or registrations, and on known basic features of commercial trackers and mobile apps (e.g. feedback on behaviour and self-monitoring of behaviour in Fitbit devices); <sup>d</sup>For apps focusing on more than one health behaviour, only BCTs related to physical activity were coded; <sup>e</sup>Blinded tracker: activity monitor which does not display any information monitored, nor it allows the participant to download or access those data (measurement tool for research-purposes only). Abbreviations: app: application; BCT: behaviour change technique; NR: not reported; SMS: Short Messaging Service (i.e. text messaging); SNS: Social Networking Site.

**Supplement 19: eTable 12. Presence of gamification and games in included studies**

| Author, year              | Gamification elements  | Delivery platform  | Quotes                                                                                                                                                                                                                                                                                                                                                                                                                                                                                                                                                                                                                                                                           |
|---------------------------|------------------------|--------------------|----------------------------------------------------------------------------------------------------------------------------------------------------------------------------------------------------------------------------------------------------------------------------------------------------------------------------------------------------------------------------------------------------------------------------------------------------------------------------------------------------------------------------------------------------------------------------------------------------------------------------------------------------------------------------------|
| Wyke, 2019                | Competition            | Tracker (MatchFit) | "MatchFIT allowed participants to contribute their weekly steps to their group's collective average step count and compare it with that of a virtual competitor team."                                                                                                                                                                                                                                                                                                                                                                                                                                                                                                           |
| DiFranciso-Donoghue, 2018 | Challenges             | Email              | "Weekly emails were sent to this group offering fitness challenges in an attempt to foster an increase in step count"; "Throughout the study the men and women in the Fitbit-Plus group were routinely encouraged to compete with each other in weekly challenges"                                                                                                                                                                                                                                                                                                                                                                                                               |
| Pope, 2018                | None                   | N/A                | N/A                                                                                                                                                                                                                                                                                                                                                                                                                                                                                                                                                                                                                                                                              |
| Vandelanotte, 2018        | None                   | N/A                | N/A                                                                                                                                                                                                                                                                                                                                                                                                                                                                                                                                                                                                                                                                              |
| Ashton, 2017              | None                   | N/A                | N/A                                                                                                                                                                                                                                                                                                                                                                                                                                                                                                                                                                                                                                                                              |
| Brakenridge, 2016         | None                   | N/A                | N/A                                                                                                                                                                                                                                                                                                                                                                                                                                                                                                                                                                                                                                                                              |
| Finkelstein, 2016         | Badges                 | Website (Fitbit)   | "An additional feature of the website is a system of non-monetary rewards whereby participants could earn badges (visible to others in the support group) for meeting specific targets"                                                                                                                                                                                                                                                                                                                                                                                                                                                                                          |
| Poirier, 2016             | Points, levels, badges | Website (Walkadoo) | "Participants receive virtual rewards (points, levels, and badges) for performing certain actions and reaching milestones such as completing a steps goal, achieving a personal best, and engaging socially with the community (eg, by encouraging other participants via "smiles" and comments, or by participating in group competitions)"                                                                                                                                                                                                                                                                                                                                     |
| Ashe, 2015                | Competition            | Website            | "social networking and/or friendly competitions"                                                                                                                                                                                                                                                                                                                                                                                                                                                                                                                                                                                                                                 |
| Cadmus-Bertram, 2015      | None                   | N/A                | N/A                                                                                                                                                                                                                                                                                                                                                                                                                                                                                                                                                                                                                                                                              |
| Martin S, 2015            | None                   | N/A                | N/A                                                                                                                                                                                                                                                                                                                                                                                                                                                                                                                                                                                                                                                                              |
| Thorndike, 2014           | Avatar                 | Tracker            | "The monitor displayed steps, energy consumed, and distance travelled, and it also displayed an activity "avatar" that would grow larger with increasing activity and smaller with more sedentary behaviour"                                                                                                                                                                                                                                                                                                                                                                                                                                                                     |
| Patel, 2019               | Points, levels         | SMS/email          | "Participants in the intervention arms (support [n = 151], collaboration [n = 150], and competition [n = 150]) were entered into a game with points and levels that was run automatically (participants did not have to actively play the game, just strive for step goals) and provided a daily notification of their progress."; "Second, every Monday the participant received 70 points (10 for each day of the week). If the participant did not achieve their step goal on the prior day, they lost 10 points from their balance."; "at the end of each week, participants could move up or down levels (from lowest to highest: blue, bronze, silver, gold, or platinum)" |

| Author, year    | Gamification elements  | Delivery platform | Quotes                                                                                                                                                                                                                                                                                                                                                                                                                                                                                                                                                                                                                                                                                                                                                                                                                                                                                                                                                                                                                                                                                                                                                                                                                                              |
|-----------------|------------------------|-------------------|-----------------------------------------------------------------------------------------------------------------------------------------------------------------------------------------------------------------------------------------------------------------------------------------------------------------------------------------------------------------------------------------------------------------------------------------------------------------------------------------------------------------------------------------------------------------------------------------------------------------------------------------------------------------------------------------------------------------------------------------------------------------------------------------------------------------------------------------------------------------------------------------------------------------------------------------------------------------------------------------------------------------------------------------------------------------------------------------------------------------------------------------------------------------------------------------------------------------------------------------------------|
| Ellingson, 2019 | None                   | N/A               | N/A                                                                                                                                                                                                                                                                                                                                                                                                                                                                                                                                                                                                                                                                                                                                                                                                                                                                                                                                                                                                                                                                                                                                                                                                                                                 |
| Zhang, 2019     | None                   | N/A               | N/A                                                                                                                                                                                                                                                                                                                                                                                                                                                                                                                                                                                                                                                                                                                                                                                                                                                                                                                                                                                                                                                                                                                                                                                                                                                 |
| Patel, 2018     | Lottery                | SMS/email         | "lottery-based financial incentives"                                                                                                                                                                                                                                                                                                                                                                                                                                                                                                                                                                                                                                                                                                                                                                                                                                                                                                                                                                                                                                                                                                                                                                                                                |
| Robinson, 2018  | None                   | N/A               | N/A                                                                                                                                                                                                                                                                                                                                                                                                                                                                                                                                                                                                                                                                                                                                                                                                                                                                                                                                                                                                                                                                                                                                                                                                                                                 |
| Fanning, 2017   | Points, levels, badges | App (PennFit)     | "Individuals randomly assigned to groups A or C also had access to a points-based feedback module. This module was intended as a novel tool for delivering instant SCT feedback and incremental rewards, and did so using a system of "program points" (pp, awarded for all in-app tasks; see ESM Table 1), "levels" (awarded for accumulated points), and "badges" (awarded for every two earned badges); "Watching the video in full unlocked a simple quiz question intended to reinforce the video content. Answering the quiz question unlocked "support" content that could be referenced at any time (e.g. strategies for overcoming common barriers to exercise); "Points were provided for all in-app tasks", "More points were provided for more important/challenging tasks (e.g., meeting goals); "Points accumulated to earn levels"; "Badges depicting an increasingly fit avatar were awarded every 5 levels"; "New titles (e.g., "master exerciser") were provided every 2 badges"                                                                                                                                                                                                                                                  |
| Patel, 2017     | Points, levels         | SMS and/or emails | "Participants in the gamification arm were entered into a game with their family for 12 weeks that was designed using insights from behavioural economics to address predictable barriers to behaviour change and to enhance social incentives. First, participants electronically signed a commitment pledge to try their best to achieve their step goal. [...] Second, every Monday, the family was endowed with 70 points (10 for each day of the upcoming week). Each day, the family was informed of the one member who was selected at random to represent their team. If that member achieved his or her step goal on the prior day, the family kept its points; otherwise, 10 points were lost. [...] Third, each individual had 5 lifelines to use on days when they were sick or activity was infeasible. This element allowed for some forgiveness and enabled individuals to seek help from a family member. Fourth, if the family had 50 points or more at the end of the week, they advanced up a level (bronze, silver, gold, and platinum). [...] Fifth, families were informed that if they finished the intervention period at the gold or platinum level they each would receive a coffee mug with the study logo as a reward." |
| John, 2016      | Points                 | App (AchieveMint) | "Every time an AchieveMint user takes 200 steps, he or she earns one point from the platform. Points are redeemable for cash rewards: after a user has taken 200,000 steps, he or she earns \$1.00. Users receive a check for every \$25 earned. AchieveMint sends all users a weekly update email that contains information on a user's current number of earned points"                                                                                                                                                                                                                                                                                                                                                                                                                                                                                                                                                                                                                                                                                                                                                                                                                                                                           |
| King, 2016      | Avatars                | App               | "Small avatars reflecting the current physical activity/sedentary behavior levels of the                                                                                                                                                                                                                                                                                                                                                                                                                                                                                                                                                                                                                                                                                                                                                                                                                                                                                                                                                                                                                                                                                                                                                            |

| Author, year   | Gamification elements | Delivery platform                | Quotes                                                                                                                                                                                                                                                                                                                                                                                                                                                                                                                                                                                                                     |
|----------------|-----------------------|----------------------------------|----------------------------------------------------------------------------------------------------------------------------------------------------------------------------------------------------------------------------------------------------------------------------------------------------------------------------------------------------------------------------------------------------------------------------------------------------------------------------------------------------------------------------------------------------------------------------------------------------------------------------|
|                |                       |                                  | participant and other members of the “virtual team” to which he/she had been automatically assigned, as well as another “virtual team”, were viewable on the phone’s glance-able display throughout the day. Team members could also interact with one another through the app’s online message board.”                                                                                                                                                                                                                                                                                                                    |
| Melton, 2016   | None                  | N/A                              | N/A                                                                                                                                                                                                                                                                                                                                                                                                                                                                                                                                                                                                                        |
| Patel, 2016 I  | Lottery               | SMS/email/automated call         | “In the individual incentive arm, each participant on a winning team was eligible to collect \$50, but only if he or she had at least 7000 steps on the prior day. In the team incentive arm, each participant on the winning team was eligible to collect \$50 only if all four members of their team had each achieved at least 7000 steps on the prior day. In the combined incentive arm, each participant on the winning team was eligible to collect \$20 if he or she had at least 7000 steps on the prior day and then an additional \$10 for each team member who also had at least 7000 steps on the prior day.” |
| Patel, 2016 II | None                  | N/A                              | N/A                                                                                                                                                                                                                                                                                                                                                                                                                                                                                                                                                                                                                        |
| Walsh, 2016    | None                  | N/A                              | N/A                                                                                                                                                                                                                                                                                                                                                                                                                                                                                                                                                                                                                        |
| Cowdery, 2015* | Exergame              | App (Zombies, Run! And The Walk) | “Zombies, Run! is an immersive running game and audio adventure that instructs players to collect supplies and avoid being attacked by Zombies as they exercise.”; “The Walk is also an audio adventure game that presents episodes and challenges to the player, who is tasked with a package that must be delivered in order to save the world. In order to stay alive, the player must walk/run the length of the United Kingdom.”                                                                                                                                                                                      |
| Wang, 2015     | None                  | N/A                              | N/A                                                                                                                                                                                                                                                                                                                                                                                                                                                                                                                                                                                                                        |
| Glynn, 2014    | None                  | N/A                              | N/A                                                                                                                                                                                                                                                                                                                                                                                                                                                                                                                                                                                                                        |

\*Exergame. Abbreviations: App: application; email: electronic mail; N/A: not applicable; SMS: Short Messaging Service (i.e. text-messaging).

**Supplement 20: eTable 13. Presence of personalization in included studies**

| Author, year       | Personalisation quotes from the article                                                                                                                                                                                                                                                                                                                                                                                                                                             |
|--------------------|-------------------------------------------------------------------------------------------------------------------------------------------------------------------------------------------------------------------------------------------------------------------------------------------------------------------------------------------------------------------------------------------------------------------------------------------------------------------------------------|
| Wyke, 2019         | "track progress against individualized, incremental goals to increase both their daily step count and time spent upright"                                                                                                                                                                                                                                                                                                                                                           |
| Donoghue, 2018     | NR                                                                                                                                                                                                                                                                                                                                                                                                                                                                                  |
| Pope, 2018         | NR                                                                                                                                                                                                                                                                                                                                                                                                                                                                                  |
| Vandelanotte, 2018 | "To generate the personalized module content in the non-Fitbit group, participants were asked questions about how active they have been the previous week in conjunction with questions relating to individual, social, environmental, and theory-based correlates of physical activity behaviour. On the basis of the answers of participants, and through applying IF-THEN algorithms, personally relevant physical activity content was automatically selected from a database." |
| Ashton, 2017       | "The individual session took place in week three of the program and provided personalized feedback from the Jawbone physical activity data"; "personal tailored goals were set"                                                                                                                                                                                                                                                                                                     |
| Brakenridge, 2016  | NR                                                                                                                                                                                                                                                                                                                                                                                                                                                                                  |
| Finkelstein, 2016  | "personalised feedback from Fitbit."; "tailored website with customized information for participants, employers, and/or charities"                                                                                                                                                                                                                                                                                                                                                  |
| Poirier, 2016      | "Internet-based walking program that assigns daily step goals tailored to each participant"; "The system generates goals that are tailored to the participant based on their most recent activity level. The goal-setting algorithm is modelled on a rank-order percentile approach developed following principles of behavioural economics and operant shaping"                                                                                                                    |
| Ashe, 2015         | "the exercise professionals (personal trainer or exercise physiologist) used recorded step counts (from the Fitbit) to calculate step increases at individualized sessions."                                                                                                                                                                                                                                                                                                        |
| Cadmus, 2015       | "Individualized goals were set for the first 4 weeks of the study (using data observed on the baseline ActiGraph) and the participant committed to a specific plan to achieve these."                                                                                                                                                                                                                                                                                               |
| Martin S, 2015     | "On the day of enrolment, all participants completed an online questionnaire to provide information on 16 personal and clinical characteristics, which was later used for personalizing text messages within the texting arm."                                                                                                                                                                                                                                                      |
| Thorndike, 2014    | "the subject will have access to a personalized Fitbit website to view his or her daily and weekly totals of all measurements"                                                                                                                                                                                                                                                                                                                                                      |
| Patel, 2019        | NR                                                                                                                                                                                                                                                                                                                                                                                                                                                                                  |
| Ellingson, 2019    | NR                                                                                                                                                                                                                                                                                                                                                                                                                                                                                  |
| Zhang, 2019        | NR                                                                                                                                                                                                                                                                                                                                                                                                                                                                                  |
| Patel, 2018        | NR                                                                                                                                                                                                                                                                                                                                                                                                                                                                                  |
| Robinson, 2018     | "multi-component, personalised implementation intention intervention"; "intervention condition received instructions to plan how, where, and when they would add steps to their daily routine to meet their step goal, using personalised schedules and maps"                                                                                                                                                                                                                       |
| Fanning, 2017      | "Feedback was highly individualized to encourage adherence while supporting self-efficacy"; "Emails contained an opening paragraph that was tailored by position within the program, weekly educational content, and progress toward the previous weekly goal"                                                                                                                                                                                                                      |
| Patel, 2017        | NR                                                                                                                                                                                                                                                                                                                                                                                                                                                                                  |
| John, 2016         | NR                                                                                                                                                                                                                                                                                                                                                                                                                                                                                  |
| King, 2016         | "personalised and quantified goal-setting and behavioural feedback"                                                                                                                                                                                                                                                                                                                                                                                                                 |
| Melton, 2016       | NR                                                                                                                                                                                                                                                                                                                                                                                                                                                                                  |
| Patel, 2016 I      | NR                                                                                                                                                                                                                                                                                                                                                                                                                                                                                  |
| Patel, 2016 II     | NR                                                                                                                                                                                                                                                                                                                                                                                                                                                                                  |
| Walsh, 2016        | NR                                                                                                                                                                                                                                                                                                                                                                                                                                                                                  |
| Cowdery, 2015      | NR                                                                                                                                                                                                                                                                                                                                                                                                                                                                                  |

|             |    |
|-------------|----|
| Wang, 2015  | NR |
| Glynn, 2014 | NR |

Abbreviations: NR: not reported.



**Supplement 21: eFigure 1. Funnel plot of standard error by standardised difference in means**

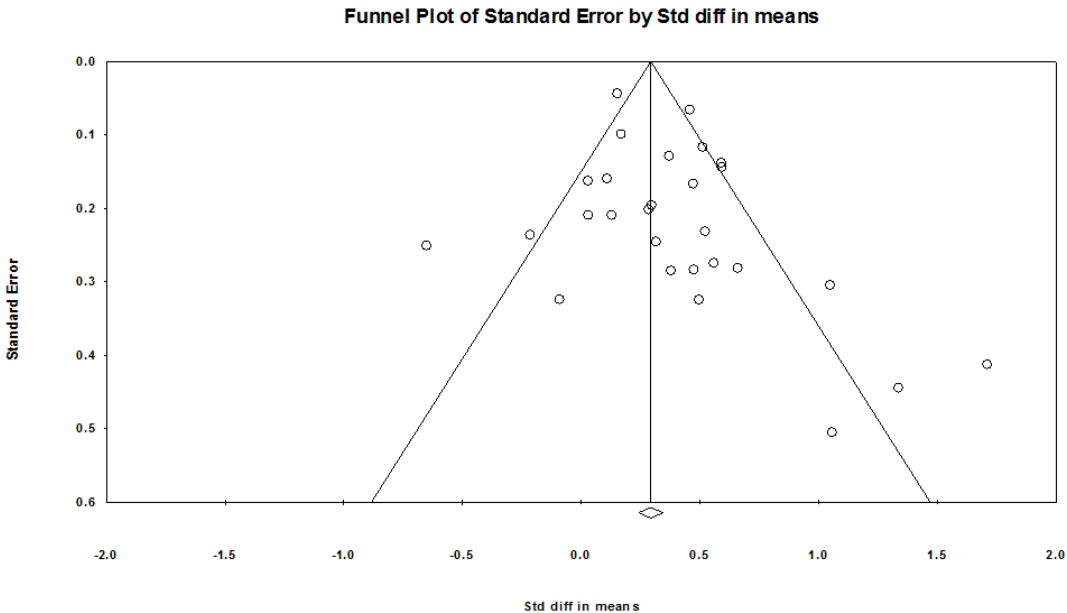

The funnel plot indicates the presence of publication bias, with small studies showing inflated SDMs; Trimming 5 of those studies using Duval and Tweedie’s trim and fill method adjusts the estimate, which remained significant (SDM 0.275; 95% CI 0.16 to 0.39).

**Duval and Tweedie's trim and fill**

|                 | Fixed Effects   |                |             |             | Random Effects |             |             | Q Value   |
|-----------------|-----------------|----------------|-------------|-------------|----------------|-------------|-------------|-----------|
|                 | Studies Trimmed | Point Estimate | Lower Limit | Upper Limit | Point Estimate | Lower Limit | Upper Limit |           |
| Observed values |                 | 0.29218        | 0.24062     | 0.34374     | 0.35037        | 0.23591     | 0.46483     | 88.09486  |
| Adjusted values | 5               | 0.27182        | 0.22092     | 0.32271     | 0.27524        | 0.15567     | 0.39481     | 116.26799 |

**Look for missing studies where?**

- ☐ Not specified
- ☒ To left of mean
- ☐ To right of mean

**Look for missing studies using which model?**

- ☐ Not specified
- ☐ Fixed effect model
- ☒ Random effects model

**Supplement 22: eTable 14. Sensitivity analyses**

| Moderator                                                                  | Description                                                                                             | Number of studies | SDM (95% confidence interval)                                           | I <sup>2</sup> (%) | P     |
|----------------------------------------------------------------------------|---------------------------------------------------------------------------------------------------------|-------------------|-------------------------------------------------------------------------|--------------------|-------|
| <b>1.Sample size above the median</b>                                      | Studies with a sample size above the median (99 participants)                                           | 16                | 0.303 (0.192 to 0.413)                                                  | 65.7               | 0.19  |
|                                                                            | Remaining studies                                                                                       | 12                | 0.539 (0.203 to 0.876)                                                  | 73.3               |       |
| <b>2.Low risk of bias</b>                                                  | Studies with 4 or more categories assessed as low risk of bias, from a total of 6 possible <sup>a</sup> | 17                | 0.387 (0.259 to 0.515)                                                  | 60.2               | 0.455 |
|                                                                            | Remaining studies                                                                                       | 11                | 0.289 (0.066 to 0.512)                                                  | 69.6               |       |
| <b>3.Primary outcome</b>                                                   | Studies where the outcome included in the analysis was the primary outcome                              | 20                | 0.397 (0.257 to 0.537)                                                  | 72.9               | 0.239 |
|                                                                            | Remaining studies                                                                                       | 8                 | 0.244 (0.03 to 0.458)                                                   | 60.1               |       |
| <b>4a.Outcome type (as per main analysis)</b>                              | Daily step count                                                                                        | 21                | 0.346 (0.211 to 0.481)<br>Difference in means: 753.2 (460.1 to 1046.2)  | 72.6               | 0.555 |
|                                                                            | MVPA                                                                                                    | 4                 | 0.53 (0.122 to 0.938)                                                   | 69.3               |       |
|                                                                            | Other                                                                                                   | 3                 | 0.214 (-0.193 to 0.621)                                                 | 62.1               |       |
| <b>4b.Outcome type (all studies reporting a given outcome)<sup>b</sup></b> | Daily step count                                                                                        | 23                | 0.331 (0.208 to 0.454)<br>Difference in means: 705.531 (440.4 to 970.7) | 70.6               | N/A   |
|                                                                            | MVPA                                                                                                    | 8                 | 0.396 (0.165 to 0.626)                                                  | 57.7               |       |
| <b>5.Outcome measurement*</b>                                              | Accelerometer                                                                                           | 11                | 0.225 (0.025 to 0.426)                                                  | 67.6               | 0.14  |
|                                                                            | Self-reported                                                                                           | 3                 | 0.214 (-0.193 to 0.621)                                                 | 62.1               |       |
|                                                                            | Tracker or mobile app                                                                                   | 14                | 0.476 (0.303 to 0.65)                                                   | 74.9               |       |
| <b>6.Longest follow-up available</b>                                       | Mean duration: 18 weeks (8 studies contributing new data for longest follow-up)                         | 28                | 0.322 (0.218 to 0.426)                                                  | N/A                | N/A   |
| <b>7.Control group</b>                                                     | True control                                                                                            | 12                | 0.345 (0.170 to 0.52)                                                   | 67.1               | 0.92  |
|                                                                            | Active control                                                                                          | 16                | 0.358 (0.196 to 0.520)                                                  | 70.3               |       |

<sup>a</sup>Assessed based on the Cochrane risk of bias tool; <sup>b</sup>Outcome assessed in at least 5 studies

Abbreviations: MVPA, moderate-to-vigorous physical activity (min/week); NA, not applicable; SDM, standardised difference in means

**Supplement 23: eFigure 2. Forest plot of effect sizes and 95% confidence intervals by ascending order of retention rate representing the effect of interventions involving mobile applications or activity trackers in increasing physical activity (random effects model)**

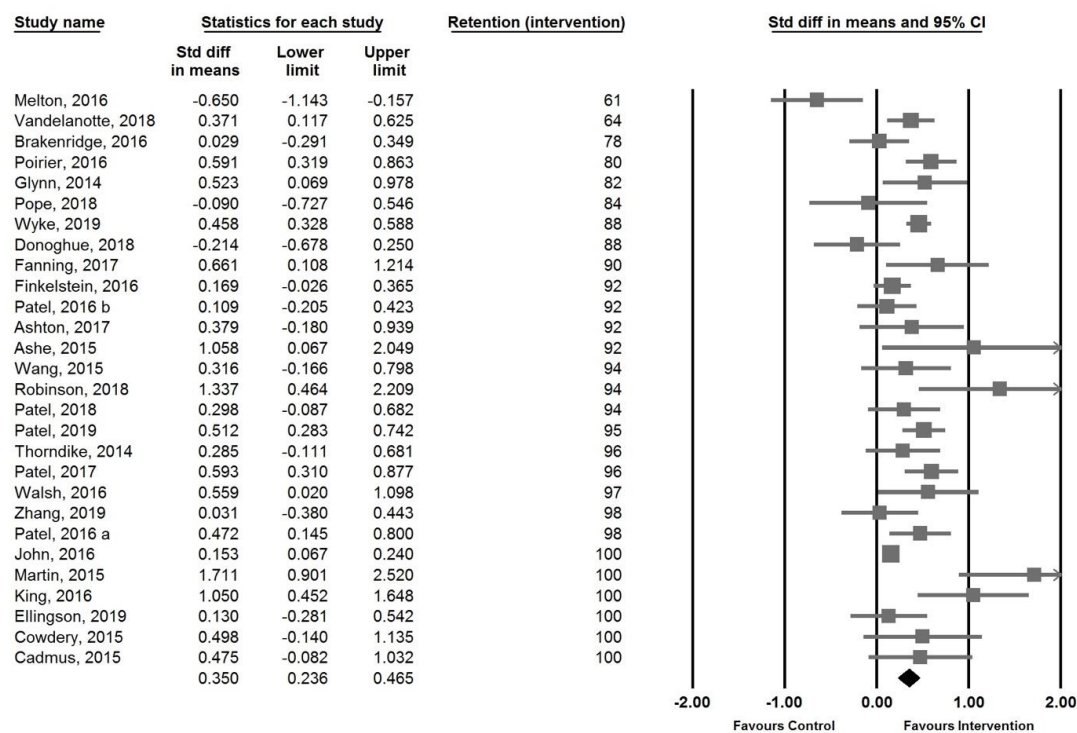

**Supplement 24: eFigure 3: Forest plot of effect sizes and 95 % confidence intervals by ascending order of study duration representing the effect of interventions involving mobile applications or activity trackers in increasing physical activity (random effects model)**

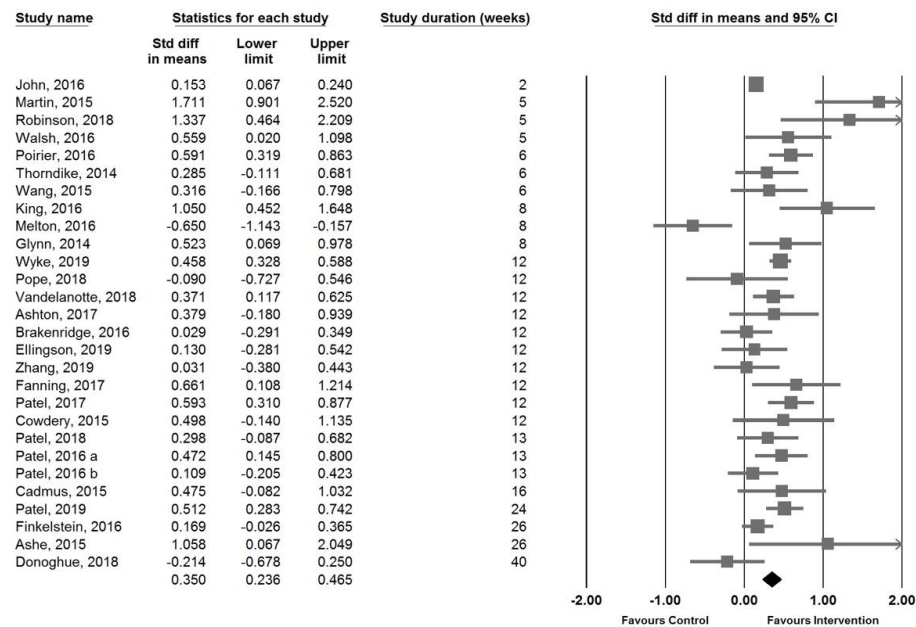

**Supplement 25: eFigure 4: Forest plot of effect sizes and 95% confidence intervals by decreasing order of number of low risk of bias categories (out of 6 categories in the Cochrane risk of bias tool) representing the effect of interventions involving mobile applications or activity trackers in increasing physical activity (random effects model)**

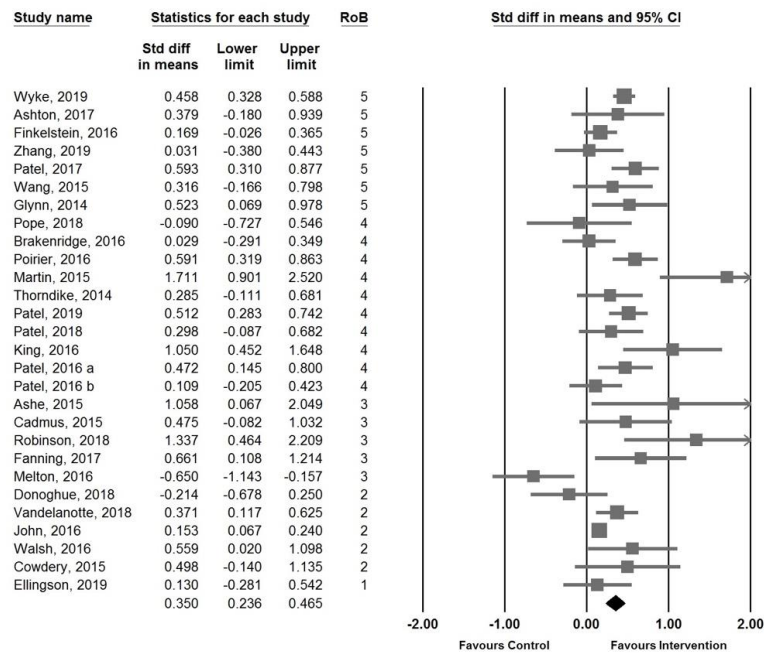

**Supplement 26: eFigure 5. Forest plot of effect sizes and 95% confidence intervals by subgroup of studies where the intervention included behaviour change techniques in the ‘goals and planning’ category, representing the effect of interventions involving mobile applications or activity trackers in increasing physical activity (random effects model)**

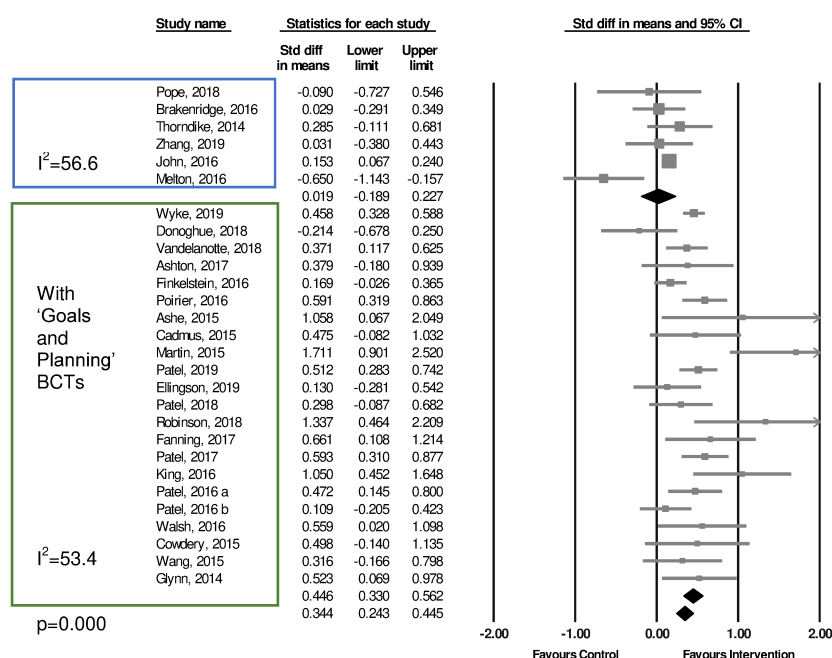

**Supplement 27: eFigure 6. Forest plot of effect sizes and 95% confidence intervals by subgroup of studies where the intervention included text-messaging, representing the effect of interventions involving mobile applications or activity trackers in increasing physical activity (random effects model)**

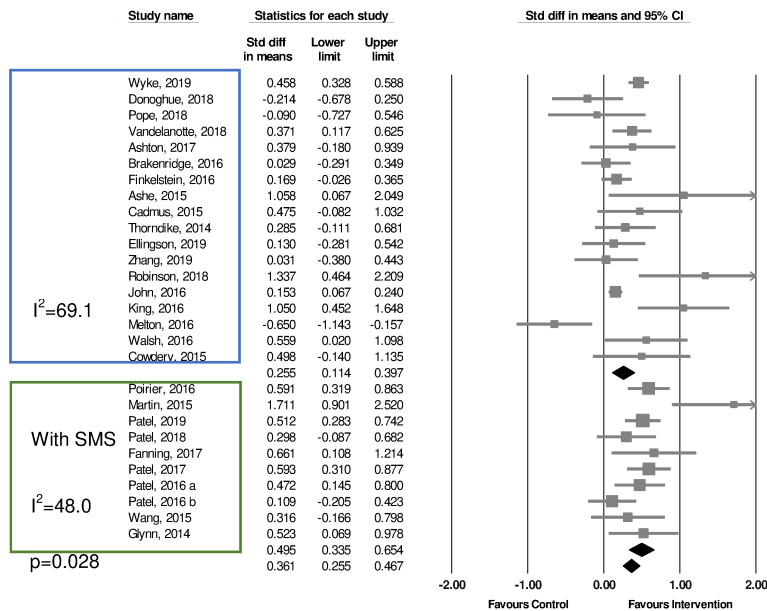

**Supplement 28: eFigure 7. Forest plot of effect sizes and 95% confidence intervals by subgroup of studies mentioning personalisation features, representing the effect of interventions involving mobile applications or activity trackers in increasing physical activity (random effects model)**

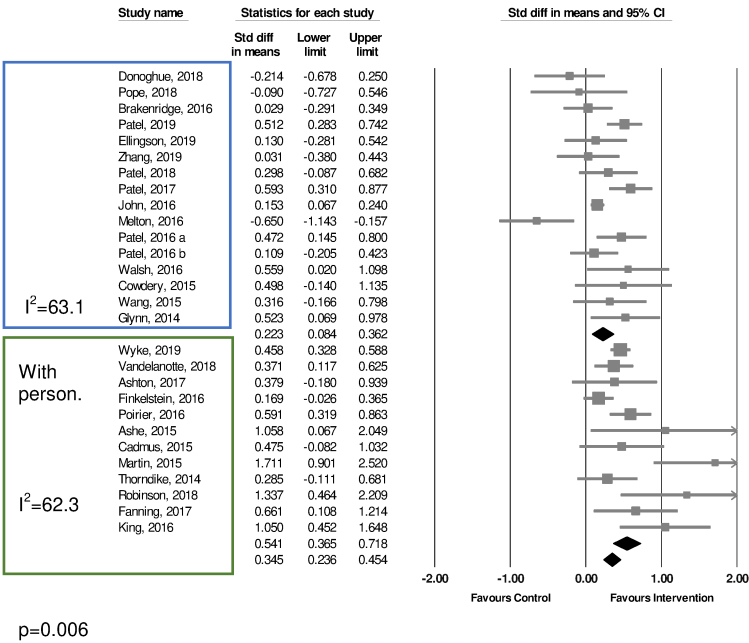



**Supplement 29: eFigure 8. Forest plot of effect sizes and 95% confidence intervals by subgroup of studies where authors mentioned conflicts of interest, representing the effect of interventions involving mobile applications or activity trackers in increasing physical activity (random effects model)**

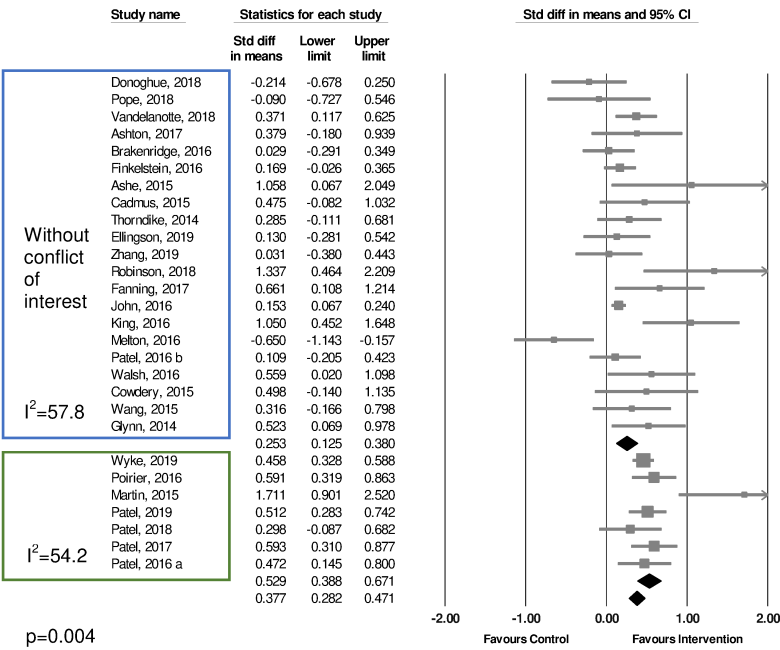

**Supplement 30: eFigure 9. Forest plot of effect sizes and 95% confidence intervals by subgroup of studies where the intervention included the behaviour change technique ‘graded tasks’, representing the effect of interventions involving mobile applications or activity trackers in increasing physical activity (random effects model)**

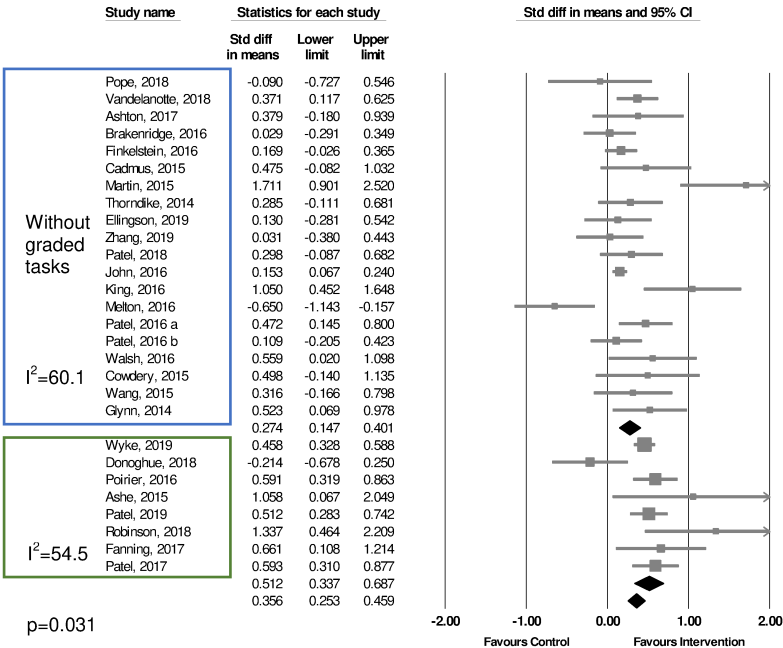

**Supplement 31: eFigure 10. Forest plot of effect sizes and 95% confidence intervals by subgroup of studies mentioning a behaviour change theory, representing the effect of interventions involving mobile applications or activity trackers in increasing physical activity (random effects model)**

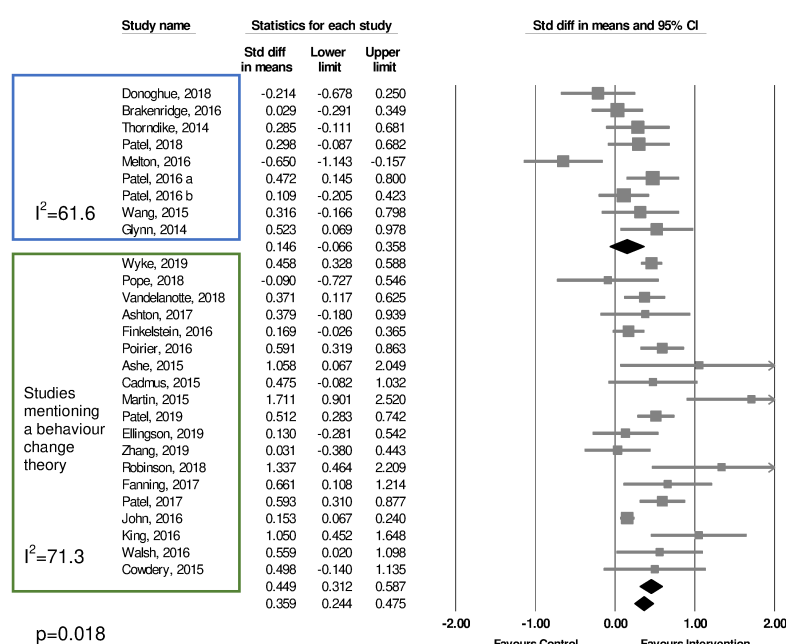

**Supplement 32: eTable 15. Subgroup analyses**

| Moderator                                                      | Description                                                                    | Number of studies | SDM (95% confidence interval) | I <sup>2</sup> (%) | P                        |
|----------------------------------------------------------------|--------------------------------------------------------------------------------|-------------------|-------------------------------|--------------------|--------------------------|
| <b>Goals and planning*</b>                                     | Studies where the intervention includes BCTs in this category                  | 22                | 0.446 (0.33 to 0.562)         | 53.4               | <b>0.000</b>             |
|                                                                | Remaining studies                                                              | 6                 | 0.019 (-0.189 to 0.227)       | 56.6               |                          |
| <b>Text-messaging*</b>                                         | Studies where the intervention includes text-messaging                         | 10                | 0.495 (0.335 to 0.654)        | 48                 | <b>0.028<sup>a</sup></b> |
|                                                                | Remaining studies                                                              | 18                | 0.255 (0.114 to 0.397)        | 69.1               |                          |
| <b>Personalisation</b>                                         | Studies mentioning personalisation in the intervention                         | 12                | 0.541 (0.365 to 0.718)        | 62.3               | <b>0.006</b>             |
|                                                                | Remaining studies                                                              | 16                | 0.223 (0.084 to 0.362)        | 63.1               |                          |
| <b>Conflicts of interest</b>                                   | Studies where the authors mention conflicts of interest                        | 7                 | 0.529 (0.388 to 0.671)        | 45.1               | <b>0.004</b>             |
|                                                                | Remaining studies                                                              | 21                | 0.253 (0.125 to 0.380)        | 56.9               |                          |
| <b>Graded tasks*</b>                                           | Studies where the intervention includes this BCT                               | 8                 | 0.512 (0.337 to 0.687)        | 54.5               | <b>0.031</b>             |
|                                                                | Remaining studies                                                              | 20                | 0.274 (0.147 to 0.401)        | 60.1               |                          |
| <b>Studies mentioning behaviour change theories</b>            | Studies mentioning behaviour change theories, models, frameworks or constructs | 19                | 0.449 (0.312 to 0.587)        | 71.3               | <b>0.018</b>             |
|                                                                | Remaining studies                                                              | 9                 | 0.146 (-0.066 to 0.358)       | 61.6               |                          |
| <b>Tracker or app are the only difference between I and C*</b> | Studies where the tracker or app are the only difference between I and C       | 5                 | 0.136 (-0.31 to 0.582)        | 82.4               | 0.284                    |
|                                                                | Remaining studies                                                              | 23                | 0.388 (0.272 to 0.504)        | 65.3               |                          |
| <b>Tracker*</b>                                                | Studies where the intervention includes an activity tracker                    | 20                | 0.308 (0.172 to 0.445)        | 74.7               | 0.22                     |
|                                                                | Remaining studies                                                              | 8                 | 0.453 (0.267 to 0.639)        | 28.1               |                          |
| <b>App*</b>                                                    | Studies where the intervention includes a mobile application                   | 21                | 0.354 (0.215 to 0.492)        | 71.9               | 0.957                    |
|                                                                | Remaining studies                                                              | 7                 | 0.347 (0.122 to 0.572)        | 64.5               |                          |
| <b>Social BCTs*</b>                                            | Studies where the intervention includes social BCTs <sup>b</sup>               | 16                | 0.351 (0.226 to 0.476)        | 59                 | 0.846                    |
|                                                                | Remaining studies                                                              | 12                | 0.379 (0.141 to 0.616)        | 73.3               |                          |
| <b>Shaping knowledge*</b>                                      | Studies where the intervention includes BCTs from this category                | 14                | 0.478 (0.285 to 0.672)        | 65.3               | 0.093                    |
|                                                                | Remaining studies                                                              | 14                | 0.271 (0.126 to 0.416)        | 70                 |                          |
| <b>Prompts/ cues*</b>                                          | Studies where the intervention includes this BCT                               | 16                | 0.396 (0.21 to 0.583)         | 76.1               | 0.541                    |
|                                                                | Remaining studies                                                              | 12                | 0.325 (0.193 to 0.457)        | 48.4               |                          |

| Moderator                                     | Description                                                                                                      | Number of studies | SDM (95% confidence interval) | I <sup>2</sup> (%) | P     |
|-----------------------------------------------|------------------------------------------------------------------------------------------------------------------|-------------------|-------------------------------|--------------------|-------|
| <b>Reward and threat*</b>                     | Studies where the intervention includes BCTs in this category                                                    | 11                | 0.442 (0.274 to 0.611)        | 74.2               | 0.187 |
|                                               | Remaining studies                                                                                                | 17                | 0.279 (0.105 to 0.453)        | 67.1               |       |
| <b>Problem solving*</b>                       | Studies where the intervention includes this BCT                                                                 | 8                 | 0.509 (0.262 to 0.756)        | 43.4               | 0.155 |
|                                               | Remaining studies                                                                                                | 20                | 0.307 (0.178 to 0.437)        | 73.7               |       |
| <b>Action planning*</b>                       | Studies where the intervention includes this BCT                                                                 | 5                 | 0.492 (0.303 to 0.681)        | 30.4               | 0.123 |
|                                               | Remaining studies                                                                                                | 23                | 0.313 (0.184 to 0.441)        | 68.9               |       |
| <b>Information about health consequences*</b> | Studies where the intervention includes this BCT                                                                 | 7                 | 0.345 (0.182 to 0.509)        | 53.5               | 0.947 |
|                                               | Remaining studies                                                                                                | 21                | 0.353 (0.201 to 0.505)        | 72.3               |       |
| <b>Credible source*</b>                       | Studies where the intervention includes this BCT                                                                 | 6                 | 0.505 (0.248 to 0.761)        | 71.1               | 0.186 |
|                                               | Remaining studies                                                                                                | 22                | 0.31 (0.178 to 0.442)         | 67.2               |       |
| <b>Review behaviour goals*</b>                | Studies where the intervention includes this BCT                                                                 | 5                 | 0.473 (0.354 to 0.593)        | 0                  | 0.089 |
|                                               | Remaining studies                                                                                                | 23                | 0.321 (0.192 to 0.45)         | 70.8               |       |
| <b>Study duration ≥12 weeks*</b>              | Studies with duration equal or above 12 weeks                                                                    | 18                | 0.314 (0.203 to 0.424)        | 46.8               | 0.253 |
|                                               | Remaining studies                                                                                                | 10                | 0.494 (0.205 to 0.783)        | 82.5               |       |
| <b>Physically inactive/ sedentary</b>         | Studies recruiting only physically inactive or sedentary people                                                  | 12                | 0.505 (0.274 to 0.736)        | 70.9               | 0.116 |
|                                               | Remaining studies                                                                                                | 16                | 0.289 (0.152 to 0.427)        | 67.2               |       |
| <b>Overweight/ obese</b>                      | Studies recruiting only overweight/ obese individuals                                                            | 6                 | 0.368 (0.252 to 0.484)        | 11.5               | 0.802 |
|                                               | Remaining studies                                                                                                | 24                | 0.345 (0.201 to 0.488)        | 71.7               |       |
| <b>Face-to-face or telephone</b>              | Studies where the intervention includes human contact for face-to-face and/or phone call components <sup>c</sup> | 11                | 0.383 (0.263 to 0.50)         | 11.1               | 0.65  |
|                                               | Remaining studies                                                                                                | 17                | 0.337 (0.177 to 0.497)        | 76.3               |       |
| <b>Gamification</b>                           | Studies where the intervention includes gamification features                                                    | 14                | 0.405 (0.267 to 0.544)        | 71.9               | 0.396 |
|                                               | Remaining studies                                                                                                | 14                | 0.294 (0.078 to 0.51)         | 68.1               |       |
| <b>Website</b>                                | Studies where the intervention includes website                                                                  | 9                 | 0.456 (0.248 to 0.663)        | 58.6               | 0.24  |
|                                               | Remaining studies                                                                                                | 19                | 0.305 (0.164 to 0.446)        | 73                 |       |
| <b>Email</b>                                  | Studies where the intervention includes email                                                                    | 15                | 0.347 (0.168 to 0.527)        | 78                 | 0.936 |
|                                               | Remaining studies                                                                                                | 13                | 0.357 (0.223 to 0.49)         | 38.9               |       |
| <b>Online Social Network</b>                  | Studies where the intervention includes Online Social Network                                                    | 5                 | 0.397 (0.04 to 0.754)         | 65.8               | 0.768 |
|                                               | Remaining studies                                                                                                | 23                | 0.34 (0.217 to 0.463)         | 70.3               |       |
| <b>Study</b>                                  | Studies where there were                                                                                         | 15                | 0.378 (0.229 to               | 67.5               | 0.561 |

| Moderator  | Description                                   | Number of studies | SDM (95% confidence interval) | I <sup>2</sup> (%) | P |
|------------|-----------------------------------------------|-------------------|-------------------------------|--------------------|---|
| incentives | incentives for study compliance or completion |                   | 0.526)                        |                    |   |
|            | Remaining studies                             | 13                | 0.31 (0.138 to 0.483)         | 59.2               |   |

\* Pre-specified in the protocol; <sup>a</sup>In 5 studies out of the 10 where SMS is included, participants could should to received SMS, email, or both—a sensitivity analysis considering these 5 studies as not including SMS was still statistically significant (p=0.035); <sup>b</sup>Social BCTs are: social support, social comparison, social reward, social incentive; <sup>c</sup>Automated phone calls excluded. Abbreviations: BCT: Behaviour Change Technique; C: Control group; I: Intervention group; MVPA: Moderate-to-vigorous physical activity; SDM: Standardized difference in means.
